# Supplementary material for: Old and New Stories: Revelations from Functional Analysis of the Bovine Mammary Transcriptome during the Lactation Cycle
Source: PLoS One. 2012 Mar 12;7(3):e33268. doi: 10.1371/journal.pone.0033268 (PMC3299771; doi:10.1371/journal.pone.0033268)
Supplement: File S4 — Tabulated results from the REVIGO analysis of Gene Ontology terms using output from the DIA as described in Additional file S3. (XLSX) [file pone.0033268.s014.xlsx]

## Sheet: REVIGO table results GO BP
BIOLOGICAL PROCESS
ACTIVATED DURING LACTATION											Total unique	ACTIVATED DURING LACTATION											Total unique	INHIBITED DURING LACTATION											Total unique	INHIBITED DURING LACTATION											Total unique
ONLY IMPACT RESULTS											167	DIRECTION OF THE IMPACT RESULTS											171	ONLY IMPACT RESULTS											182	DIRECTION OF THE IMPACT RESULTS											194
term ID	description	frequency	plot_X	plot_Y	plot_size	value	uniqueness	dispensability	representative	eliminated		term ID	description	frequency	plot_X	plot_Y	plot_size	value	uniqueness	dispensability	representative	eliminated		term ID	description	frequency	plot_X	plot_Y	plot_size	value	uniqueness	dispensability	representative	eliminated		term ID	description	frequency	plot_X	plot_Y	plot_size	value	uniqueness	dispensability	representative	eliminated
GO:0002862	negative regulation of inflammatory response to antigenic stimulus	0.00036	-1.076	1.233	0.699	1762.57	0.695	0	2862	0		GO:0005984	disaccharide metabolic process	0.00072	0.596	1.278	1	4937.69	0.924	0	5984	0		GO:0042117	monocyte activation	0.00014	3.419	1.985	0.301	893.594	0.912	0	42117	0		GO:0030321	transepithelial chloride transport	0.00022	-1.96	3.42	0.477	-496.376	0.945	0	30321	0
GO:0001798	positive regulation of type IIa hypersensitivity	0.00051	null	null	0.845	1220.54	0.642	0.921	2862	1		GO:0046351	disaccharide biosynthetic process	0.00065	null	null	0.954	4937.69	0.902	0.968	5984	1		GO:0043616	keratinocyte proliferation	0.00065	1.582	-0.725	0.954	218.544	0.983	0	43616	0		GO:0070634	transepithelial ammonium transport	0.00022	null	null	0.477	-419.114	0.942	0.899	30321	1
GO:0002894	positive regulation of type II hypersensitivity	0.00051	null	null	0.845	1220.54	0.642	0.999	2862	1		GO:0009312	oligosaccharide biosynthetic process	0.00101	null	null	1.146	3232.42	0.908	0.932	5984	1		GO:0070634	transepithelial ammonium transport	0.00022	-1.793	-3.871	0.477	573.638	0.946	0	70634	0		GO:0042117	monocyte activation	0.00014	3.947	-1.332	0.301	-893.594	0.888	0	42117	0
GO:0002892	regulation of type II hypersensitivity	0.00051	null	null	0.845	1220.54	0.675	0.999	2862	1		GO:0005989	lactose biosynthetic process	0.00051	null	null	0.845	4937.69	0.903	0.888	5984	1		GO:0030321	transepithelial chloride transport	0.00022	null	null	0.477	496.376	0.949	0.899	70634	1		GO:0006659	phosphatidylserine biosynthetic process	7e-05	-1.646	-2.355	0	-641.605	0.911	0.006	6659	0
GO:0002891	positive regulation of immunoglobulin mediated immune response	0.00115	null	null	1.204	610.269	0.688	0.941	2862	1		GO:0005988	lactose metabolic process	0.00051	null	null	0.845	4937.69	0.924	0.952	5984	1		GO:0015696	ammonium transport	0.00065	null	null	0.954	425.845	0.946	0.856	70634	1		GO:0007042	lysosomal lumen acidification	0.00022	-1.122	6.439	0.477	-532.073	0.818	0.006	7042	0
GO:0002885	positive regulation of hypersensitivity	0.00065	null	null	0.954	1220.54	0.665	0.983	2862	1		GO:0007341	penetration of zona pellucida	7e-05	-6.85	-0.12	0	988.171	0.879	0	7341	0		GO:0006659	phosphatidylserine biosynthetic process	7e-05	-1.414	2.37	0	641.605	0.909	0.006	6659	0		GO:0045851	pH reduction	0.00087	null	null	1.079	-354.716	0.871	0.804	7042	1
GO:0002888	positive regulation of myeloid leukocyte mediated immunity	0.00051	null	null	0.845	1220.54	0.747	0.952	2862	1		GO:0033194	response to hydroperoxide	7e-05	1.696	-0.687	0	1586.12	0.902	0	33194	0		GO:0019835	cytolysis	0.00166	0.918	-0.453	1.362	366.458	0.971	0.007	19835	0		GO:0051453	regulation of intracellular pH	0.00094	null	null	1.114	-266.037	0.864	0.987	7042	1
GO:0050777	negative regulation of immune response	0.00144	null	null	1.301	617.966	0.734	0.738	2862	1		GO:0051702	interaction with symbiont	0.00144	-1.225	0.176	1.301	624.497	0.933	0	51702	0		GO:0051014	actin filament severing	0.00029	0.177	-0.63	0.602	275.137	0.973	0.007	51014	0		GO:0051452	intracellular pH reduction	0.00079	null	null	1.041	-354.716	0.865	0.905	7042	1
GO:0002883	regulation of hypersensitivity	0.00072	null	null	1	929.101	0.699	0.992	2862	1		GO:0051825	adhesion to other organism involved in symbiotic interaction	0.00051	null	null	0.845	276.628	0.918	0.777	51702	1		GO:0016338	calcium-independent cell-cell adhesion	0.00043	-0.149	-0.957	0.778	294.225	0.983	0.008	16338	0		GO:0007040	lysosome organization	0.00108	null	null	1.176	-124.901	0.903	0.793	7042	1
GO:0001796	regulation of type IIa hypersensitivity	0.00051	null	null	0.845	1220.54	0.675	0.999	2862	1		GO:0051856	adhesion to symbiont	0.00051	null	null	0.845	276.628	0.918	0.777	51702	1		GO:0010507	negative regulation of autophagy	0.00036	-3.151	3.576	0.699	622.557	0.812	0.044	10507	0		GO:0030004	cellular monovalent inorganic cation homeostasis	0.00094	null	null	1.114	-212.829	0.866	0.878	7042	1
GO:0050728	negative regulation of inflammatory response	0.00289	null	null	1.602	469.991	0.712	0.826	2862	1		GO:0052192	movement in environment of other organism involved in symbiotic interaction	0.00051	null	null	0.845	276.628	0.922	0.777	51702	1		GO:0031330	negative regulation of cellular catabolic process	0.00202	null	null	1.447	193.213	0.798	0.796	10507	1		GO:0030641	regulation of cellular pH	0.00094	null	null	1.114	-266.037	0.864	0.999	7042	1
GO:0002864	regulation of acute inflammatory response to antigenic stimulus	0.00072	null	null	1	929.101	0.699	0.999	2862	1		GO:0022614	membrane to membrane docking	0.00036	-0.862	0.652	0.699	184.419	0.987	0.007	22614	0		GO:0042177	negative regulation of protein catabolic process	0.00231	null	null	1.505	181.104	0.778	0.916	10507	1		GO:0021877	forebrain neuron fate commitment	0.00036	7.504	1.28	0.699	-460.916	0.82	0.007	21877	0
GO:0002863	positive regulation of inflammatory response to antigenic stimulus	0.00087	null	null	1.079	1220.54	0.664	0.957	2862	1		GO:0042119	neutrophil activation	0.00043	-1.238	-3.705	0.778	197.593	0.93	0.007	42119	0		GO:0010506	regulation of autophagy	0.00072	null	null	1	415.038	0.844	0.766	10507	1		GO:0021879	forebrain neuron differentiation	0.00072	null	null	1	-307.278	0.817	0.883	21877	1
GO:0002861	regulation of inflammatory response to antigenic stimulus	0.00123	null	null	1.23	1484.11	0.694	0.9	2862	1		GO:0007030	Golgi organization	0.00058	1.745	-1.774	0.903	1260.03	0.959	0.007	7030	0		GO:0016236	macroautophagy	0.00137	null	null	1.279	265.191	0.792	0.84	10507	1		GO:0051014	actin filament severing	0.00029	-0.013	0.436	0.602	-275.137	0.985	0.007	51014	0
GO:0002866	positive regulation of acute inflammatory response to antigenic stimulus	0.00065	null	null	0.954	1220.54	0.665	0.985	2862	1		GO:0050872	white fat cell differentiation	0.00058	-6.069	2.701	0.903	782.876	0.926	0.007	50872	0		GO:0016242	negative regulation of macroautophagy	0.00022	null	null	0.477	622.557	0.709	0.883	10507	1		GO:0019835	cytolysis	0.00166	-0.156	-0.367	1.362	-366.458	0.975	0.008	19835	0
GO:0005984	disaccharide metabolic process	0.00072	0.923	-2.454	1	4937.69	0.926	0	5984	0		GO:0048103	somatic stem cell division	0.00072	-0.865	0.571	1	176.582	0.986	0.008	48103	0		GO:0016241	regulation of macroautophagy	0.00029	null	null	0.602	415.038	0.732	0.899	10507	1		GO:0016338	calcium-independent cell-cell adhesion	0.00043	-0.182	0.546	0.778	-200.165	0.975	0.008	16338	0
GO:0046351	disaccharide biosynthetic process	0.00065	null	null	0.954	4937.69	0.909	0.968	5984	1		GO:0033627	cell adhesion mediated by integrin	0.00108	0.064	-0.823	1.176	276.628	0.963	0.008	33627	0		GO:0009267	cellular response to starvation	0.00289	null	null	1.602	194.306	0.838	0.929	10507	1		GO:0030010	establishment of cell polarity	0.00123	-0.052	0.355	1.23	-149.318	0.984	0.008	30010	0
GO:0009312	oligosaccharide biosynthetic process	0.00101	null	null	1.146	3351.16	0.915	0.932	5984	1		GO:0000086	G2/M transition of mitotic cell cycle	0.0013	-0.276	0.269	1.255	194.483	0.991	0.008	86	0		GO:0032108	negative regulation of response to nutrient levels	0.00101	null	null	1.146	414.641	0.773	0.899	10507	1		GO:0016180	snRNA processing	0.00058	-1.506	-4.009	0.903	-419.707	0.909	0.045	16180	0
GO:0005989	lactose biosynthetic process	0.00051	null	null	0.845	4937.69	0.91	0.888	5984	1		GO:0032429	regulation of phospholipase A2 activity	0.00036	2.405	3.484	0.699	557.548	0.872	0.028	32429	0		GO:0032099	negative regulation of appetite	0.00079	null	null	1.041	237.597	0.749	0.982	10507	1		GO:0035235	ionotropic glutamate receptor signaling pathway	0.00036	-0.423	-1.471	0.699	-402.904	0.899	0.058	35235	0
GO:0005988	lactose metabolic process	0.00051	null	null	0.845	4937.69	0.927	0.952	5984	1		GO:0007202	activation of phospholipase C activity	0.00123	null	null	1.23	273.363	0.857	0.851	32429	1		GO:0032096	negative regulation of response to food	0.00079	null	null	1.041	237.597	0.775	0.982	10507	1		GO:0051000	positive regulation of nitric-oxide synthase activity	0.00036	-1.94	-2.9	0.699	-179.881	0.878	0.066	51000	0
GO:0051702	interaction with symbiont	0.00144	-1.399	0.288	1.301	624.497	0.931	0	51702	0		GO:0010518	positive regulation of phospholipase activity	0.00152	null	null	1.322	239.193	0.856	0.944	32429	1		GO:0031669	cellular response to nutrient levels	0.00375	null	null	1.716	184.364	0.845	0.871	10507	1		GO:0032465	regulation of cytokinesis	0.00029	0.707	0.492	0.602	-264.576	0.916	0.073	32465	0
GO:0051825	adhesion to other organism involved in symbiotic interaction	0.00051	null	null	0.845	276.628	0.918	0.777	51702	1		GO:0060193	positive regulation of lipase activity	0.00224	null	null	1.491	173.958	0.853	0.888	32429	1		GO:0042982	amyloid precursor protein metabolic process	0.00051	-0.385	-0.179	0.845	458.597	0.936	0.049	42982	0		GO:0008214	protein dealkylation	0.00065	-2.365	-0.073	0.954	-252.421	0.927	0.101	8214	0
GO:0051856	adhesion to symbiont	0.00051	null	null	0.845	276.628	0.918	0.777	51702	1		GO:0010863	positive regulation of phospholipase C activity	0.0013	null	null	1.255	273.363	0.857	0.971	32429	1		GO:0007042	lysosomal lumen acidification	0.00022	-0.19	-6.626	0.477	532.073	0.823	0.058	7042	0		GO:0019344	cysteine biosynthetic process	0.00014	-2.695	-5.039	0.301	-415.97	0.873	0.123	19344	0
GO:0052192	movement in environment of other organism involved in symbiotic interaction	0.00051	null	null	0.845	276.628	0.925	0.777	51702	1		GO:0018106	peptidyl-histidine phosphorylation	0.00043	1.713	2.935	0.778	238.323	0.949	0.051	18106	0		GO:0045851	pH reduction	0.00087	null	null	1.079	354.716	0.877	0.804	7042	1		GO:0015012	heparan sulfate proteoglycan biosynthetic process	0.00058	null	null	0.903	-131.412	0.907	0.706	19344	1
GO:0007030	Golgi organization	0.00058	1.768	2.67	0.903	1260.03	0.951	0.007	7030	0		GO:0006656	phosphatidylcholine biosynthetic process	0.00094	3.191	6.573	1.114	1184.88	0.847	0.054	6656	0		GO:0051453	regulation of intracellular pH	0.00094	null	null	1.114	266.037	0.87	0.987	7042	1		GO:0009070	serine family amino acid biosynthetic process	0.00051	null	null	0.845	-171.189	0.875	0.767	19344	1
GO:0000086	G2/M transition of mitotic cell cycle	0.0013	-0.163	-0.555	1.255	402.513	0.992	0.008	86	0		GO:0045017	glycerolipid biosynthetic process	0.00498	null	null	1.839	277.888	0.872	0.75	6656	1		GO:0051452	intracellular pH reduction	0.00079	null	null	1.041	354.716	0.871	0.905	7042	1		GO:0030201	heparan sulfate proteoglycan metabolic process	0.00058	null	null	0.903	-131.412	0.921	0.817	19344	1
GO:0006656	phosphatidylcholine biosynthetic process	0.00094	2.747	-6.924	1.114	1522.41	0.863	0.054	6656	0		GO:0046470	phosphatidylcholine metabolic process	0.00159	null	null	1.342	552.696	0.853	0.923	6656	1		GO:0007040	lysosome organization	0.00108	null	null	1.176	350.361	0.896	0.793	7042	1		GO:0006534	cysteine metabolic process	0.00036	null	null	0.699	-166.388	0.882	0.813	19344	1
GO:0045017	glycerolipid biosynthetic process	0.00498	null	null	1.839	454.768	0.881	0.75	6656	1		GO:0008654	phospholipid biosynthetic process	0.0052	null	null	1.857	180.415	0.876	0.729	6656	1		GO:0030004	cellular monovalent inorganic cation homeostasis	0.00094	null	null	1.114	212.829	0.872	0.878	7042	1		GO:0006563	L-serine metabolic process	0.00058	null	null	0.903	-163.635	0.89	0.838	19344	1
GO:0046470	phosphatidylcholine metabolic process	0.00159	null	null	1.342	763.652	0.87	0.923	6656	1		GO:0042415	norepinephrine metabolic process	0.00065	null	null	0.954	192.449	0.908	0.711	6656	1		GO:0030641	regulation of cellular pH	0.00094	null	null	1.114	266.037	0.87	0.999	7042	1		GO:0030166	proteoglycan biosynthetic process	0.00137	null	null	1.279	-123.28	0.918	0.867	19344	1
GO:0008654	phospholipid biosynthetic process	0.0052	null	null	1.857	347.271	0.886	0.729	6656	1		GO:0042439	ethanolamine-containing compound metabolic process	0.00202	null	null	1.447	355.932	0.901	0.772	6656	1		GO:0032465	regulation of cytokinesis	0.00029	0.201	-0.731	0.602	264.576	0.928	0.073	32465	0		GO:0000097	sulfur amino acid biosynthetic process	0.00087	null	null	1.079	-160.288	0.867	0.842	19344	1
GO:0042439	ethanolamine-containing compound metabolic process	0.00202	null	null	1.447	601.412	0.916	0.772	6656	1		GO:0006099	tricarboxylic acid cycle	0.00274	1.513	1.43	1.58	275.991	0.921	0.06	6099	0		GO:0035235	ionotropic glutamate receptor signaling pathway	0.00036	-0.452	1.108	0.699	402.904	0.902	0.077	35235	0		GO:0017000	antibiotic biosynthetic process	0.00014	-0.502	-0.751	0.301	-127.11	0.943	0.126	17000	0
GO:0006084	acetyl-CoA metabolic process	0.00383	-0.265	-0.602	1.724	287.905	0.95	0.061	6084	0		GO:0046356	acetyl-CoA catabolic process	0.00281	null	null	1.591	275.991	0.93	0.982	6099	1		GO:0045685	regulation of glial cell differentiation	0.00065	7.361	-0.435	0.954	534.391	0.77	0.077	45685	0		GO:0016999	antibiotic metabolic process	0.00014	null	null	0.301	-127.11	0.957	0.797	17000	1
GO:0046356	acetyl-CoA catabolic process	0.00281	null	null	1.591	289.887	0.926	0.982	6084	1		GO:0009109	coenzyme catabolic process	0.00303	null	null	1.623	245.891	0.93	0.973	6099	1		GO:0014013	regulation of gliogenesis	0.00072	null	null	1	534.391	0.769	0.766	45685	1		GO:0031503	protein complex localization	0.00022	-1.741	3.603	0.477	-297.498	0.938	0.141	31503	0
GO:0009109	coenzyme catabolic process	0.00303	null	null	1.623	258.323	0.926	0.973	6084	1		GO:0006084	acetyl-CoA metabolic process	0.00383	null	null	1.724	246.536	0.943	0.783	6099	1		GO:0006509	membrane protein ectodomain proteolysis	0.00209	-1.551	0.491	1.462	351.056	0.94	0.087	6509	0		GO:0032488	Cdc42 protein signal transduction	0.00079	-0.576	-1.787	1.041	-201.408	0.888	0.153	32488	0
GO:0006099	tricarboxylic acid cycle	0.00274	null	null	1.58	289.887	0.925	0.783	6084	1		GO:0051187	cofactor catabolic process	0.00332	null	null	1.663	211.219	0.932	0.725	6099	1		GO:0051606	detection of stimulus	0.00484	0.036	-0.224	1.826	186.967	0.958	0.09	51606	0		GO:0070633	transepithelial transport	0.00051	-1.847	3.471	0.845	-279.409	0.949	0.166	70633	0
GO:0032429	regulation of phospholipase A2 activity	0.00036	2.224	-4.916	0.699	875.418	0.874	0.066	32429	0		GO:0007262	STAT protein import into nucleus	7e-05	1.555	-6.823	0	1187.53	0.825	0.062	7262	0		GO:0016180	snRNA processing	0.00058	-1.404	3.502	0.903	419.707	0.916	0.1	16180	0		GO:0032922	circadian regulation of gene expression	0.00036	-2.057	-4.048	0.699	-237.597	0.875	0.173	32922	0
GO:0007202	activation of phospholipase C activity	0.00123	null	null	1.23	273.363	0.862	0.851	32429	1		GO:0046425	regulation of JAK-STAT cascade	0.00274	null	null	1.58	198.959	0.813	0.953	7262	1		GO:0031503	protein complex localization	0.00022	-1.753	-4.168	0.477	297.498	0.946	0.141	31503	0		GO:0000720	pyrimidine dimer repair by nucleotide-excision repair	0.00014	-0.877	-3.3	0.301	-411.359	0.883	0.173	720	0
GO:0010863	positive regulation of phospholipase C activity	0.0013	null	null	1.255	273.363	0.862	0.971	32429	1		GO:0046427	positive regulation of JAK-STAT cascade	0.0026	null	null	1.556	232.119	0.761	0.729	7262	1		GO:0006166	purine ribonucleoside salvage	0.00058	-2.952	5.554	0.903	293.5	0.873	0.149	6166	0		GO:0006283	transcription-coupled nucleotide-excision repair	0.00043	null	null	0.778	-205.679	0.875	0.742	720	1
GO:0033599	regulation of mammary gland epithelial cell proliferation	0.00043	-7.225	-1.734	0.778	1391.06	0.777	0.067	33599	0		GO:0006518	peptide metabolic process	0.00361	-0.572	0.361	1.699	199.25	0.959	0.066	6518	0		GO:0043174	nucleoside salvage	0.00058	null	null	0.903	293.5	0.873	0.915	6166	1		GO:0006509	membrane protein ectodomain proteolysis	0.00209	-1.81	0.128	1.462	-244.673	0.942	0.174	6509	0
GO:0007595	lactation	0.00152	null	null	1.322	1021.89	0.732	0.735	33599	1		GO:0009650	UV protection	0.00036	0.062	0.167	0.699	479.348	0.941	0.068	9650	0		GO:0043101	purine-containing compound salvage	0.00072	null	null	1	206.883	0.879	0.929	6166	1		GO:0034104	negative regulation of tissue remodeling	0.00036	5.777	0.33	0.699	-368.144	0.771	0.186	34104	0
GO:0007262	STAT protein import into nucleus	7e-05	2.425	4.771	0	1187.53	0.83	0.068	7262	0		GO:0014823	response to activity	0.00036	-0.498	0.358	0.699	221.013	0.956	0.075	14823	0		GO:0009163	nucleoside biosynthetic process	0.00115	null	null	1.204	207.241	0.875	0.748	6166	1		GO:0046850	regulation of bone remodeling	0.00087	null	null	1.079	-263.943	0.802	0.946	34104	1
GO:0046427	positive regulation of JAK-STAT cascade	0.0026	null	null	1.556	292.308	0.735	0.729	7262	1		GO:0006378	mRNA polyadenylation	0.00058	2.61	5.227	0.903	597.138	0.931	0.139	6378	0		GO:0046129	purine ribonucleoside biosynthetic process	0.00115	null	null	1.204	207.241	0.869	0.95	6166	1		GO:0045124	regulation of bone resorption	0.00072	null	null	1	-263.943	0.768	0.891	34104	1
GO:0009650	UV protection	0.00036	0.101	-0.505	0.699	578.066	0.932	0.075	9650	0		GO:0043631	RNA polyadenylation	0.00087	null	null	1.079	259.818	0.929	0.897	6378	1		GO:0042455	ribonucleoside biosynthetic process	0.00115	null	null	1.204	207.241	0.87	0.999	6166	1		GO:0060135	maternal process involved in female pregnancy	0.00051	6.442	1.378	0.845	-382.918	0.886	0.186	60135	0
GO:0022407	regulation of cell-cell adhesion	0.00173	-0.118	0.089	1.38	280.274	0.884	0.083	22407	0		GO:0031124	mRNA 3'-end processing	0.00108	null	null	1.176	358.283	0.928	0.872	6378	1		GO:0042451	purine nucleoside biosynthetic process	0.00115	null	null	1.204	207.241	0.869	0.999	6166	1		GO:0003009	skeletal muscle contraction	0.00065	6.997	1.231	0.954	-121.998	0.881	0.193	3009	0
GO:0006378	mRNA polyadenylation	0.00058	1.866	-4.436	0.903	597.138	0.936	0.139	6378	0		GO:0030512	negative regulation of transforming growth factor beta receptor signaling pathway	0.00108	-0.772	-3.65	1.176	791.501	0.803	0.14	30512	0		GO:0032488	Cdc42 protein signal transduction	0.00079	-0.729	1.626	1.041	201.408	0.891	0.153	32488	0		GO:0046174	polyol catabolic process	0.00022	-2.59	-3.588	0.477	-343.191	0.914	0.205	46174	0
GO:0043631	RNA polyadenylation	0.00087	null	null	1.079	337.32	0.935	0.897	6378	1		GO:0030514	negative regulation of BMP signaling pathway	0.00144	null	null	1.301	649.467	0.799	0.893	30512	1		GO:0051000	positive regulation of nitric-oxide synthase activity	0.00036	-2.163	2.137	0.699	179.881	0.889	0.165	51000	0		GO:0007215	glutamate signaling pathway	0.00036	-0.417	-1.64	0.699	-402.904	0.899	0.216	7215	0
GO:0031124	mRNA 3'-end processing	0.00108	null	null	1.176	358.283	0.933	0.872	6378	1		GO:0030510	regulation of BMP signaling pathway	0.0018	null	null	1.398	392.075	0.823	0.807	30512	1		GO:0015802	basic amino acid transport	0.00079	-2.025	-4.436	1.041	520.509	0.935	0.171	15802	0		GO:0006383	transcription from RNA polymerase III promoter	0.00079	-1.676	-4.899	1.041	-372.231	0.911	0.218	6383	0
GO:0030521	androgen receptor signaling pathway	0.00159	0.87	0.691	1.342	629.106	0.875	0.144	30521	0		GO:0043534	blood vessel endothelial cell migration	0.00159	1.621	-6.6	1.342	1057.41	0.907	0.149	43534	0		GO:0032922	circadian regulation of gene expression	0.00036	-2.352	3.139	0.699	237.597	0.887	0.173	32922	0		GO:0034380	high-density lipoprotein particle assembly	0.00072	4.077	6.44	1	-337.667	0.755	0.221	34380	0
GO:0048013	ephrin receptor signaling pathway	0.00022	1.157	1.034	0.477	491.193	0.879	0.154	48013	0		GO:0043129	surfactant homeostasis	0.00014	-7.154	0.202	0.301	861.262	0.868	0.157	43129	0		GO:0000720	pyrimidine dimer repair by nucleotide-excision repair	0.00014	-0.726	2.819	0.301	411.359	0.883	0.173	720	0		GO:0034375	high-density lipoprotein particle remodeling	0.00058	null	null	0.903	-287.9	0.759	0.864	34380	1
GO:0006817	phosphate transport	0.00051	1.468	5.184	0.845	1180.35	0.936	0.156	6817	0		GO:0032800	receptor biosynthetic process	0.00137	2.661	5.468	1.279	432.498	0.933	0.159	32800	0		GO:0006283	transcription-coupled nucleotide-excision repair	0.00043	null	null	0.778	205.679	0.875	0.742	720	1		GO:0034377	plasma lipoprotein particle assembly	0.00115	null	null	1.204	-281.389	0.748	0.957	34380	1
GO:0032800	receptor biosynthetic process	0.00137	2.161	-5.296	1.279	512.943	0.939	0.159	32800	0		GO:0006817	phosphate transport	0.00051	1.672	-7.018	0.845	1049.13	0.931	0.17	6817	0		GO:0008214	protein dealkylation	0.00065	-2.048	0.746	0.954	252.421	0.93	0.174	8214	0		GO:0034384	high-density lipoprotein particle clearance	0.00058	null	null	0.903	-305.335	0.816	0.812	34380	1
GO:0007341	penetration of zona pellucida	7e-05	-6.546	-0.207	0	988.171	0.889	0.167	7341	0		GO:0030521	androgen receptor signaling pathway	0.00159	0.024	-1.532	1.342	479.777	0.884	0.173	30521	0		GO:0070633	transepithelial transport	0.00051	-1.796	-4.008	0.845	382.425	0.954	0.181	70633	0		GO:0034382	chylomicron remnant clearance	0.00051	null	null	0.845	-119.921	0.817	0.89	34380	1
GO:0043534	blood vessel endothelial cell migration	0.00159	1.008	4.467	1.342	1057.41	0.916	0.17	43534	0		GO:0043092	L-amino acid import	0.00072	1.742	-7.169	1	836.458	0.905	0.18	43092	0		GO:0060135	maternal process involved in female pregnancy	0.00051	6.415	-0.305	0.845	382.918	0.892	0.193	60135	0		GO:0034381	plasma lipoprotein particle clearance	0.00123	null	null	1.23	-152.668	0.807	0.856	34380	1
GO:0060263	regulation of respiratory burst	0.00072	1.814	-4.227	1	293.097	0.892	0.173	60263	0		GO:0043090	amino acid import	0.00072	null	null	1	836.458	0.909	0.703	43092	1		GO:0046697	decidualization	0.00166	null	null	1.362	190.966	0.832	0.779	60135	1		GO:0034368	protein-lipid complex remodeling	0.00094	null	null	1.114	-151.647	0.892	0.999	34380	1
GO:0043129	surfactant homeostasis	0.00014	-7.026	-0.207	0.301	861.262	0.867	0.174	43129	0		GO:0051938	L-glutamate import	0.00043	null	null	0.778	836.458	0.901	0.965	43092	1		GO:0003016	respiratory system process	0.00123	6.886	-0.063	1.23	177.24	0.894	0.205	3016	0		GO:0034369	plasma lipoprotein particle remodeling	0.00094	null	null	1.114	-151.647	0.752	0.981	34380	1
GO:0043092	L-amino acid import	0.00072	1.436	5.146	1	836.458	0.914	0.18	43092	0		GO:0070779	D-aspartate import	0.00036	null	null	0.699	836.458	0.901	0.954	43092	1		GO:0007215	glutamate signaling pathway	0.00036	-0.523	1.289	0.699	402.904	0.902	0.216	7215	0		GO:0034370	triglyceride-rich lipoprotein particle remodeling	0.00072	null	null	1	-159.436	0.756	0.948	34380	1
GO:0043090	amino acid import	0.00072	null	null	1	836.458	0.917	0.703	43092	1		GO:0070777	D-aspartate transport	0.00036	null	null	0.699	836.458	0.903	1	43092	1		GO:0006383	transcription from RNA polymerase III promoter	0.00079	-1.603	4.487	1.041	372.231	0.917	0.218	6383	0		GO:0065005	protein-lipid complex assembly	0.00123	null	null	1.23	-241.191	0.889	0.911	34380	1
GO:0051938	L-glutamate import	0.00043	null	null	0.778	836.458	0.909	0.965	43092	1		GO:0015800	acidic amino acid transport	0.00094	null	null	1.114	285.783	0.907	0.716	43092	1		GO:0034380	high-density lipoprotein particle assembly	0.00072	4.97	-5.752	1	337.667	0.763	0.221	34380	0		GO:0010903	negative regulation of very-low-density lipoprotein particle remodeling	0.00014	null	null	0.301	-201.182	0.702	0.79	34380	1
GO:0070779	D-aspartate import	0.00036	null	null	0.699	836.458	0.91	0.954	43092	1		GO:0015807	L-amino acid transport	0.00123	null	null	1.23	234.752	0.906	0.744	43092	1		GO:0034375	high-density lipoprotein particle remodeling	0.00058	null	null	0.903	287.9	0.767	0.864	34380	1		GO:0010901	regulation of very-low-density lipoprotein particle remodeling	0.00022	null	null	0.477	-201.182	0.733	0.876	34380	1
GO:0070777	D-aspartate transport	0.00036	null	null	0.699	836.458	0.912	1	43092	1		GO:0008037	cell recognition	0.00217	-7.913	0.733	1.477	279.932	0.9	0.193	8037	0		GO:0034377	plasma lipoprotein particle assembly	0.00115	null	null	1.204	281.389	0.756	0.957	34380	1		GO:0043206	fibril organization	0.00014	-1.975	7.24	0.301	-173.784	0.922	0.234	43206	0
GO:0015800	acidic amino acid transport	0.00094	null	null	1.114	285.783	0.916	0.716	43092	1		GO:0009303	rRNA transcription	0.00051	2.013	4.512	0.845	257.621	0.927	0.211	9303	0		GO:0034384	high-density lipoprotein particle clearance	0.00058	null	null	0.903	305.335	0.832	0.812	34380	1		GO:0008340	determination of adult lifespan	0.00072	6.768	1.108	1	-263.943	0.865	0.24	8340	0
GO:0051181	cofactor transport	0.00051	0.535	3.344	0.845	293.031	0.949	0.18	51181	0		GO:0051290	protein heterotetramerization	0.00036	2.46	-2.401	0.699	499.181	0.965	0.225	51290	0		GO:0034368	protein-lipid complex remodeling	0.00094	null	null	1.114	208.228	0.877	0.999	34380	1		GO:0001302	replicative cell aging	0.00022	null	null	0.477	-210.476	0.906	0.723	8340	1
GO:0008037	cell recognition	0.00217	-7.576	-0.692	1.477	338.565	0.902	0.208	8037	0		GO:0060055	angiogenesis involved in wound healing	0.00014	-7.055	1.533	0.301	1437.08	0.807	0.233	60055	0		GO:0034372	very-low-density lipoprotein particle remodeling	0.00072	null	null	1	202.36	0.763	0.963	34380	1		GO:0002690	positive regulation of leukocyte chemotaxis	0.00115	1.588	0.414	1.204	-893.594	0.654	0.243	2690	0
GO:0006308	DNA catabolic process	0.00245	3.084	-5.419	1.531	406.618	0.917	0.21	6308	0		GO:0006102	isocitrate metabolic process	0.00029	2.061	5.578	0.602	278.249	0.926	0.234	6102	0		GO:0034369	plasma lipoprotein particle remodeling	0.00094	null	null	1.114	208.228	0.759	0.981	34380	1		GO:0002688	regulation of leukocyte chemotaxis	0.00144	null	null	1.301	-893.594	0.68	0.888	2690	1
GO:0009303	rRNA transcription	0.00051	2.028	-4.687	0.845	315.566	0.933	0.211	9303	0		GO:0030656	regulation of vitamin metabolic process	0.00036	2.422	5.559	0.699	709.081	0.861	0.237	30656	0		GO:0034370	triglyceride-rich lipoprotein particle remodeling	0.00072	null	null	1	234.878	0.763	0.948	34380	1		GO:0002687	positive regulation of leukocyte migration	0.00209	null	null	1.462	-308.483	0.714	0.93	2690	1
GO:0051290	protein heterotetramerization	0.00036	2.294	2.864	0.699	499.181	0.959	0.225	51290	0		GO:0006513	protein monoubiquitination	0.00051	1.401	2.577	0.845	197.437	0.947	0.244	6513	0		GO:0065005	protein-lipid complex assembly	0.00123	null	null	1.23	241.191	0.876	0.911	34380	1		GO:0002685	regulation of leukocyte migration	0.00267	null	null	1.568	-176.173	0.748	0.81	2690	1
GO:0006102	isocitrate metabolic process	0.00029	1.47	-4.44	0.602	278.249	0.938	0.234	6102	0		GO:0033599	regulation of mammary gland epithelial cell proliferation	0.00043	-7.541	1.143	0.778	1391.06	0.782	0.245	33599	0		GO:0010903	negative regulation of very-low-density lipoprotein particle remodeling	0.00014	null	null	0.301	201.182	0.727	0.79	34380	1		GO:0032109	positive regulation of response to nutrient levels	0.0013	null	null	1.255	-251.284	0.777	0.994	2690	1
GO:0030656	regulation of vitamin metabolic process	0.00036	2.201	-5.645	0.699	709.081	0.868	0.237	30656	0		GO:0007595	lactation	0.00152	null	null	1.322	981.759	0.724	0.735	33599	1		GO:0010901	regulation of very-low-density lipoprotein particle remodeling	0.00022	null	null	0.477	201.182	0.752	0.876	34380	1		GO:0032105	negative regulation of response to extracellular stimulus	0.00101	null	null	1.146	-194.988	0.771	0.887	2690	1
GO:0033194	response to hydroperoxide	7e-05	0.409	4.378	0	1586.12	0.887	0.245	33194	0		GO:0050766	positive regulation of phagocytosis	0.00173	2.129	-6.231	1.38	820.023	0.756	0.25	50766	0		GO:0018126	protein hydroxylation	0.00014	-2.075	0.614	0.301	223.909	0.936	0.231	18126	0		GO:0032106	positive regulation of response to extracellular stimulus	0.0013	null	null	1.255	-251.284	0.779	0.943	2690	1
GO:0050766	positive regulation of phagocytosis	0.00173	4.243	4.084	1.38	840.487	0.743	0.25	50766	0		GO:0050764	regulation of phagocytosis	0.00202	null	null	1.447	702.877	0.807	0.865	50766	1		GO:0006090	pyruvate metabolic process	0.00043	-2.083	2.904	0.778	278.858	0.924	0.233	6090	0		GO:0032107	regulation of response to nutrient levels	0.00231	null	null	1.505	-216.445	0.81	0.987	2690	1
GO:0050764	regulation of phagocytosis	0.00202	null	null	1.447	720.418	0.804	0.865	50766	1		GO:0030100	regulation of endocytosis	0.00462	null	null	1.806	258.633	0.798	0.843	50766	1		GO:0002690	positive regulation of leukocyte chemotaxis	0.00115	1.038	-1.554	1.204	893.594	0.667	0.243	2690	0		GO:0032108	negative regulation of response to nutrient levels	0.00101	null	null	1.146	-194.988	0.769	0.982	2690	1
GO:0030100	regulation of endocytosis	0.00462	null	null	1.806	303.176	0.795	0.843	50766	1		GO:0045807	positive regulation of endocytosis	0.00281	null	null	1.591	511.435	0.75	0.886	50766	1		GO:0050921	positive regulation of chemotaxis	0.00267	null	null	1.568	286.935	0.748	0.92	2690	1		GO:0032097	positive regulation of response to food	0.00123	null	null	1.23	-376.925	0.778	0.986	2690	1
GO:0045807	positive regulation of endocytosis	0.00281	null	null	1.591	595.571	0.737	0.886	50766	1		GO:0006910	phagocytosis, recognition	0.00065	null	null	0.954	597.093	0.818	0.794	50766	1		GO:0048520	positive regulation of behavior	0.00289	null	null	1.602	286.935	0.817	0.942	2690	1		GO:0032100	positive regulation of appetite	0.00115	null	null	1.204	-376.925	0.753	0.743	2690	1
GO:0006910	phagocytosis, recognition	0.00065	null	null	0.954	773.817	0.821	0.794	50766	1		GO:0006911	phagocytosis, engulfment	0.00072	null	null	1	438.594	0.898	0.8	50766	1		GO:0050920	regulation of chemotaxis	0.00318	null	null	1.643	286.935	0.774	0.956	2690	1		GO:0032099	negative regulation of appetite	0.00079	null	null	1.041	-237.597	0.747	0.891	2690	1
GO:0006911	phagocytosis, engulfment	0.00072	null	null	1	644.796	0.901	0.8	50766	1		GO:0003084	positive regulation of systemic arterial blood pressure	0.00014	-6.191	0.152	0.301	386.792	0.853	0.251	3084	0		GO:0002688	regulation of leukocyte chemotaxis	0.00144	null	null	1.301	893.594	0.684	0.888	2690	1		GO:0032096	negative regulation of response to food	0.00079	null	null	1.041	-237.597	0.772	0.965	2690	1
GO:0014902	myotube differentiation	0.00101	-5.864	-2.842	1.146	839.597	0.899	0.262	14902	0		GO:0001993	regulation of systemic arterial blood pressure by norepinephrine-epinephrine	0.00051	null	null	0.845	181.653	0.842	0.789	3084	1		GO:0002687	positive regulation of leukocyte migration	0.00209	null	null	1.462	585.111	0.744	0.93	2690	1		GO:0032095	regulation of response to food	0.00202	null	null	1.447	-304.015	0.811	0.934	2690	1
GO:0030101	natural killer cell activation	0.00152	-2.074	1.12	1.322	286.33	0.9	0.263	30101	0		GO:0043620	regulation of transcription in response to stress	0.00036	3.963	4.507	0.699	297.189	0.801	0.255	43620	0		GO:0002685	regulation of leukocyte migration	0.00267	null	null	1.568	370.556	0.769	0.81	2690	1		GO:0043487	regulation of RNA stability	0.0018	-2.57	-5.283	1.398	-153.48	0.832	0.248	43487	0
GO:0043620	regulation of transcription in response to stress	0.00036	3.802	-5.249	0.699	297.189	0.793	0.27	43620	0		GO:0030070	insulin processing	0.00029	-1.077	3.558	0.602	211.59	0.885	0.262	30070	0		GO:0007219	Notch signaling pathway	0.00245	-0.69	1.607	1.531	190.618	0.889	0.245	7219	0		GO:0009948	anterior/posterior axis specification	0.00079	6.787	1.107	1.041	-241.095	0.865	0.253	9948	0
GO:0035095	behavioral response to nicotine	0.00058	-5.551	3.165	0.903	701.021	0.837	0.275	35095	0		GO:0034405	response to fluid shear stress	0.00043	0.861	0.864	0.778	190.141	0.918	0.273	34405	0		GO:0009954	proximal/distal pattern formation	0.00123	6.959	-0.393	1.23	325.467	0.865	0.259	9954	0		GO:0018210	peptidyl-threonine modification	0.00101	-3.578	-0.109	1.146	-121.767	0.921	0.263	18210	0
GO:0035094	response to nicotine	0.00072	null	null	1	584.184	0.91	0.876	35095	1		GO:0035095	behavioral response to nicotine	0.00058	-5.442	-0.365	0.903	701.021	0.845	0.275	35095	0		GO:0008340	determination of adult lifespan	0.00072	6.876	-0.44	1	263.943	0.867	0.261	8340	0		GO:0042159	lipoprotein catabolic process	0.00036	-1.514	-1.412	0.699	-230.727	0.921	0.265	42159	0
GO:0031099	regeneration	0.00123	-5.326	-2.428	1.23	518.075	0.913	0.282	31099	0		GO:0035094	response to nicotine	0.00072	null	null	1	584.184	0.923	0.876	35095	1		GO:0001302	replicative cell aging	0.00022	null	null	0.477	210.476	0.901	0.723	8340	1		GO:0060155	platelet dense granule organization	0.00022	-1.654	6.942	0.477	-227.851	0.914	0.284	60155	0
GO:0035020	regulation of Rac protein signal transduction	0.00022	1.353	1.067	0.477	499.028	0.821	0.286	35020	0		GO:0018904	organic ether metabolic process	0.00476	2.328	5.874	1.82	197.772	0.932	0.287	18904	0		GO:0007569	cell aging	0.00231	null	null	1.505	251.429	0.885	0.852	8340	1		GO:0070664	negative regulation of leukocyte proliferation	0.00144	1.23	-1.049	1.301	-138.27	0.835	0.296	70664	0
GO:0035022	positive regulation of Rac protein signal transduction	0.00018	null	null	0.301	311.567	0.775	0.86	35020	1		GO:0008631	induction of apoptosis by oxidative stress	0.00036	0.464	0.676	0.699	770.465	0.842	0.29	8631	0		GO:0048597	post-embryonic camera-type eye morphogenesis	0.00029	8.009	-0.495	0.602	524.844	0.84	0.262	48597	0		GO:0031060	regulation of histone methylation	0.00065	-5.065	2.001	0.954	-495.453	0.739	0.303	31060	0
GO:0018904	organic ether metabolic process	0.00476	1.574	-4.698	1.82	270.784	0.942	0.287	18904	0		GO:0030330	DNA damage response, signal transduction by p53 class mediator	0.00217	null	null	1.477	255.551	0.826	0.855	8631	1		GO:0048050	post-embryonic eye morphogenesis	0.00029	null	null	0.602	524.844	0.84	0.972	48597	1		GO:0031058	positive regulation of histone modification	0.00123	null	null	1.23	-265.269	0.714	0.877	31060	1
GO:0008631	induction of apoptosis by oxidative stress	0.00036	3.395	-1.565	0.699	815.655	0.815	0.29	8631	0		GO:0042771	DNA damage response, signal transduction by p53 class mediator resulting in induction of apoptosis	0.00065	null	null	0.954	383.327	0.771	0.816	8631	1		GO:0048563	post-embryonic organ morphogenesis	0.00036	null	null	0.699	349.896	0.841	0.944	48597	1		GO:0031056	regulation of histone modification	0.00209	null	null	1.462	-159.161	0.744	0.898	31060	1
GO:0030330	DNA damage response, signal transduction by p53 class mediator	0.00217	null	null	1.477	352.126	0.81	0.855	8631	1		GO:0045948	positive regulation of translational initiation	0.00058	2.756	4.86	0.903	709.081	0.799	0.3	45948	0		GO:0031077	post-embryonic camera-type eye development	0.00036	null	null	0.699	349.896	0.847	0.957	48597	1		GO:0031062	positive regulation of histone methylation	0.00043	null	null	0.778	-495.453	0.711	0.816	31060	1
GO:0042771	DNA damage response, signal transduction by p53 class mediator resulting in induction of apoptosis	0.00065	null	null	0.954	528.189	0.74	0.816	8631	1		GO:0045727	positive regulation of translation	0.00166	null	null	1.362	275.024	0.784	0.727	45948	1		GO:0046174	polyol catabolic process	0.00022	-2.9	4.032	0.477	343.191	0.901	0.265	46174	0		GO:0032204	regulation of telomere maintenance	0.00065	null	null	0.954	-254.645	0.721	0.788	31060	1
GO:0022411	cellular component disassembly	0.00469	1.622	2.56	1.813	357.003	0.958	0.295	22411	0		GO:0030730	sequestering of triglyceride	0.00123	-1.037	-6.817	1.23	709.081	0.856	0.31	30730	0		GO:0006020	inositol metabolic process	0.00058	null	null	0.903	209.57	0.899	0.758	46174	1		GO:0043586	tongue development	0.00072	7.803	1.144	1	-316.202	0.845	0.306	43586	0
GO:0045948	positive regulation of translational initiation	0.00058	3.621	-5.802	0.903	709.081	0.794	0.3	45948	0		GO:0019915	lipid storage	0.00325	null	null	1.653	468.017	0.922	0.715	30730	1		GO:0007568	aging	0.00339	6.64	-0.486	1.672	219.055	0.896	0.275	7568	0		GO:0048569	post-embryonic organ development	0.00051	7.807	1.143	0.845	-119.149	0.853	0.313	48569	0
GO:0045727	positive regulation of translation	0.00166	null	null	1.362	275.024	0.779	0.727	45948	1		GO:0051650	establishment of vesicle localization	0.00058	1.182	-6.185	0.903	225.635	0.912	0.319	51650	0		GO:0006032	chitin catabolic process	0.00058	-2.533	4.584	0.903	450.961	0.885	0.281	6032	0		GO:0040001	establishment of mitotic spindle localization	0.00058	-2.294	6.795	0.903	-223.978	0.849	0.323	40001	0
GO:0030730	sequestering of triglyceride	0.00123	-2.041	4.612	1.23	709.081	0.863	0.31	30730	0		GO:0006903	vesicle targeting	0.00029	null	null	0.602	225.635	0.905	0.874	51650	1		GO:0000272	polysaccharide catabolic process	0.00152	null	null	1.322	334.191	0.9	0.724	6032	1		GO:0051293	establishment of spindle localization	0.00065	null	null	0.954	-149.318	0.848	0.991	40001	1
GO:0019915	lipid storage	0.00325	null	null	1.653	468.017	0.93	0.715	30730	1		GO:0051648	vesicle localization	0.00108	null	null	1.176	189.359	0.913	0.749	51650	1		GO:0006030	chitin metabolic process	0.00065	null	null	0.954	450.961	0.913	0.772	6032	1		GO:0051653	spindle localization	0.00065	null	null	0.954	-149.318	0.923	0.724	40001	1
GO:0006959	humoral immune response	0.00354	-1.629	1.249	1.69	262.744	0.871	0.316	6959	0		GO:0014902	myotube differentiation	0.00101	-6.166	2.653	1.146	723.572	0.916	0.322	14902	0		GO:0006026	aminoglycan catabolic process	0.00108	null	null	1.176	274.864	0.88	0.908	6032	1		GO:0002474	antigen processing and presentation of peptide antigen via MHC class I	0.01227	4.065	-1.349	2.23	-693.949	0.891	0.34	2474	0
GO:0050872	white fat cell differentiation	0.00058	-5.736	-2.864	0.903	818.659	0.916	0.322	50872	0		GO:0002076	osteoblast development	0.00072	-7.293	1.496	1	344.754	0.871	0.327	2076	0		GO:0060155	platelet dense granule organization	0.00022	-0.678	-7.063	0.477	227.851	0.905	0.284	60155	0		GO:0002478	antigen processing and presentation of exogenous peptide antigen	0.00274	null	null	1.58	-325.58	0.901	0.958	2474	1
GO:0045777	positive regulation of blood pressure	0.00094	-6.655	-0.173	1.114	445.825	0.844	0.325	45777	0		GO:0009410	response to xenobiotic stimulus	0.00144	1.476	-0.846	1.301	444.477	0.926	0.334	9410	0		GO:0033363	secretory granule organization	0.00065	null	null	0.954	191.24	0.899	0.716	60155	1		GO:0002495	antigen processing and presentation of peptide antigen via MHC class II	0.00217	null	null	1.477	-411.832	0.904	0.79	2474	1
GO:0008217	regulation of blood pressure	0.00426	null	null	1.771	293.365	0.827	0.743	45777	1		GO:0031099	regeneration	0.00123	-5.549	2.312	1.23	388.279	0.922	0.342	31099	0		GO:0048569	post-embryonic organ development	0.00051	7.963	-0.257	0.845	209.938	0.86	0.295	48569	0		GO:0019886	antigen processing and presentation of exogenous peptide antigen via MHC class II	0.00209	null	null	1.462	-411.832	0.903	0.787	2474	1
GO:0002076	osteoblast development	0.00072	-7.076	-1.673	1	640.608	0.869	0.327	2076	0		GO:0035020	regulation of Rac protein signal transduction	0.00022	0.082	-4.31	0.477	499.028	0.844	0.348	35020	0		GO:0031060	regulation of histone methylation	0.00065	-4.454	-2.326	0.954	495.453	0.738	0.303	31060	0		GO:0044091	membrane biogenesis	0.00022	-1.758	7.063	0.477	-201.192	0.916	0.34	44091	0
GO:0009410	response to xenobiotic stimulus	0.00144	0.189	4.679	1.301	461.878	0.914	0.334	9410	0		GO:0035022	positive regulation of Rac protein signal transduction	0.00018	null	null	0.301	311.567	0.8	0.86	35020	1		GO:0031058	positive regulation of histone modification	0.00123	null	null	1.23	395.335	0.722	0.877	31060	1		GO:0032510	endosome to lysosome transport via multivesicular body sorting pathway	0.00022	-2.174	4.284	0.477	-202.726	0.92	0.341	32510	0
GO:0006997	nucleus organization	0.0018	1.732	2.702	1.398	352.372	0.947	0.347	6997	0		GO:0060559	positive regulation of calcidiol 1-monooxygenase activity	0.00051	2.41	3.572	0.845	472.721	0.87	0.353	60559	0		GO:0031056	regulation of histone modification	0.00209	null	null	1.462	237.201	0.745	0.898	31060	1		GO:0035050	embryonic heart tube development	0.00173	8.071	1.2	1.38	-151.48	0.84	0.342	35050	0
GO:0060559	positive regulation of calcidiol 1-monooxygenase activity	0.00051	2.339	-5.134	0.845	472.721	0.871	0.353	60559	0		GO:0032770	positive regulation of monooxygenase activity	0.00115	null	null	1.204	211.68	0.863	0.9	60559	1		GO:0031062	positive regulation of histone methylation	0.00043	null	null	0.778	495.453	0.716	0.816	31060	1		GO:0048284	organelle fusion	0.00144	-1.736	7.235	1.301	-123.314	0.904	0.345	48284	0
GO:0032770	positive regulation of monooxygenase activity	0.00115	null	null	1.204	355.585	0.864	0.9	60559	1		GO:0060558	regulation of calcidiol 1-monooxygenase activity	0.00065	null	null	0.954	341.722	0.873	0.85	60559	1		GO:0016571	histone methylation	0.00289	null	null	1.602	209.107	0.793	0.832	31060	1		GO:0042535	positive regulation of tumor necrosis factor biosynthetic process	0.00108	5.484	-2.902	1.176	-282.284	0.698	0.347	42535	0
GO:0060558	regulation of calcidiol 1-monooxygenase activity	0.00065	null	null	0.954	367.359	0.871	0.85	60559	1		GO:0006927	transformed cell apoptosis	0.00036	0.08	0.457	0.699	496.159	0.957	0.354	6927	0		GO:0032204	regulation of telomere maintenance	0.00065	null	null	0.954	254.645	0.726	0.788	31060	1		GO:0042534	regulation of tumor necrosis factor biosynthetic process	0.00238	null	null	1.519	-188.189	0.717	0.936	42535	1
GO:0006927	transformed cell apoptosis	0.00036	0.934	-0.039	0.699	496.159	0.94	0.354	6927	0		GO:0030316	osteoclast differentiation	0.00224	-7.556	0.013	1.491	709.081	0.809	0.356	30316	0		GO:0000266	mitochondrial fission	0.00036	-1.01	-7.867	0.699	329.469	0.897	0.313	266	0		GO:0045409	negative regulation of interleukin-6 biosynthetic process	0.00123	null	null	1.23	-263.943	0.688	0.73	42535	1
GO:0030316	osteoclast differentiation	0.00224	-7.378	-0.746	1.491	709.081	0.787	0.356	30316	0		GO:0006825	copper ion transport	0.00058	1.715	-7.005	0.903	439.771	0.937	0.364	6825	0		GO:0040001	establishment of mitotic spindle localization	0.00058	-1.624	-7.131	0.903	223.978	0.852	0.323	40001	0		GO:0042036	negative regulation of cytokine biosynthetic process	0.00224	null	null	1.491	-149.132	0.676	0.771	42535	1
GO:0006825	copper ion transport	0.00058	1.462	5.137	0.903	439.771	0.942	0.364	6825	0		GO:0009636	response to toxin	0.00202	2.275	-1.177	1.447	269.677	0.924	0.366	9636	0		GO:0034104	negative regulation of tissue remodeling	0.00036	5.726	0.079	0.699	368.144	0.799	0.335	34104	0		GO:0045414	regulation of interleukin-8 biosynthetic process	0.00123	null	null	1.23	-212.496	0.727	0.994	42535	1
GO:0009636	response to toxin	0.00202	0.711	6.243	1.447	331.029	0.912	0.366	9636	0		GO:0045071	negative regulation of viral genome replication	0.00022	-2.931	-2.215	0.477	954.307	0.85	0.371	45071	0		GO:0046850	regulation of bone remodeling	0.00087	null	null	1.079	263.943	0.824	0.946	34104	1		GO:0045416	positive regulation of interleukin-8 biosynthetic process	0.00115	null	null	1.204	-212.496	0.695	0.792	42535	1
GO:0045071	negative regulation of viral genome replication	0.00022	-2.361	-0.403	0.477	954.307	0.85	0.371	45071	0		GO:0048525	negative regulation of viral reproduction	0.00022	null	null	0.477	954.307	0.887	0.763	45071	1		GO:0034103	regulation of tissue remodeling	0.00115	null	null	1.204	223.745	0.823	0.733	34104	1		GO:0032677	regulation of interleukin-8 production	0.0031	null	null	1.633	-169.997	0.779	0.918	42535	1
GO:0048525	negative regulation of viral reproduction	0.00022	null	null	0.477	954.307	0.88	0.763	45071	1		GO:0051806	entry into cell of other organism involved in symbiotic interaction	0.00051	null	null	0.845	276.628	0.913	0.999	45071	1		GO:0045124	regulation of bone resorption	0.00072	null	null	1	263.943	0.787	0.891	34104	1		GO:0015696	ammonium transport	0.00065	-1.888	3.524	0.954	-242.995	0.942	0.347	15696	0
GO:0051806	entry into cell of other organism involved in symbiotic interaction	0.00051	null	null	0.845	276.628	0.916	0.999	45071	1		GO:0051828	entry into other organism involved in symbiotic interaction	0.00051	null	null	0.845	276.628	0.913	0.999	45071	1		GO:0002474	antigen processing and presentation of peptide antigen via MHC class I	0.01227	3.607	2.192	2.23	693.949	0.898	0.34	2474	0		GO:0045604	regulation of epidermal cell differentiation	0.00043	7.455	1.039	0.778	-224.699	0.764	0.351	45604	0
GO:0051828	entry into other organism involved in symbiotic interaction	0.00051	null	null	0.845	276.628	0.916	0.999	45071	1		GO:0030260	entry into host cell	0.00051	null	null	0.845	276.628	0.913	0.999	45071	1		GO:0002478	antigen processing and presentation of exogenous peptide antigen	0.00274	null	null	1.58	340.37	0.907	0.958	2474	1		GO:0035315	hair cell differentiation	0.00014	null	null	0.301	-148.077	0.849	0.716	45604	1
GO:0030260	entry into host cell	0.00051	null	null	0.845	276.628	0.916	0.999	45071	1		GO:0044409	entry into host	0.00051	null	null	0.845	276.628	0.913	0.999	45071	1		GO:0002495	antigen processing and presentation of peptide antigen via MHC class II	0.00217	null	null	1.477	434.017	0.91	0.79	2474	1		GO:0014066	regulation of phosphatidylinositol 3-kinase cascade	0.00159	-0.175	-2.212	1.342	-299.254	0.854	0.355	14066	0
GO:0044409	entry into host	0.00051	null	null	0.845	276.628	0.916	0.999	45071	1		GO:0019058	viral infectious cycle	0.00224	null	null	1.491	184.419	0.924	0.856	45071	1		GO:0019886	antigen processing and presentation of exogenous peptide antigen via MHC class II	0.00209	null	null	1.462	434.017	0.909	0.787	2474	1		GO:0014068	positive regulation of phosphatidylinositol 3-kinase cascade	0.00108	null	null	1.176	-299.254	0.811	0.917	14066	1
GO:0019059	initiation of viral infection	0.00058	null	null	0.903	276.628	0.938	0.766	45071	1		GO:0019059	initiation of viral infection	0.00058	null	null	0.903	276.628	0.929	0.766	45071	1		GO:0044091	membrane biogenesis	0.00022	-0.801	-7.268	0.477	201.192	0.911	0.34	44091	0		GO:0019374	galactolipid metabolic process	0.00029	-1.215	-1.12	0.602	-339.106	0.915	0.368	19374	0
GO:0045069	regulation of viral genome replication	0.00079	null	null	1.041	304.832	0.866	0.916	45071	1		GO:0045069	regulation of viral genome replication	0.00079	null	null	1.041	241.165	0.863	0.916	45071	1		GO:0035115	embryonic forelimb morphogenesis	0.00058	7.219	-0.61	0.903	245.707	0.858	0.341	35115	0		GO:0006681	galactosylceramide metabolic process	0.00022	null	null	0.477	-339.106	0.916	0.822	19374	1
GO:0046718	entry of virus into host cell	0.00051	null	null	0.845	276.628	0.873	0.989	45071	1		GO:0046718	entry of virus into host cell	0.00051	null	null	0.845	276.628	0.862	0.989	45071	1		GO:0032510	endosome to lysosome transport via multivesicular body sorting pathway	0.00022	-2.16	-4.822	0.477	202.726	0.931	0.341	32510	0		GO:0006684	sphingomyelin metabolic process	0.00051	null	null	0.845	-119.317	0.913	0.702	19374	1
GO:0019062	virion attachment to host cell surface receptor	0.00043	null	null	0.778	276.628	0.874	0.801	45071	1		GO:0019062	virion attachment to host cell surface receptor	0.00043	null	null	0.778	276.628	0.863	0.801	45071	1		GO:0014066	regulation of phosphatidylinositol 3-kinase cascade	0.00159	-0.686	2.217	1.342	299.254	0.847	0.355	14066	0		GO:0006677	glycosylceramide metabolic process	0.00029	null	null	0.602	-339.106	0.915	0.837	19374	1
GO:0052126	movement in host environment	0.00051	null	null	0.845	276.628	0.916	0.999	45071	1		GO:0052126	movement in host environment	0.00051	null	null	0.845	276.628	0.913	0.999	45071	1		GO:0014068	positive regulation of phosphatidylinositol 3-kinase cascade	0.00108	null	null	1.176	299.254	0.812	0.917	14066	1		GO:0060620	regulation of cholesterol import	0.00022	-2.55	4.173	0.477	-301.773	0.833	0.379	60620	0
GO:0007031	peroxisome organization	0.00144	1.827	2.747	1.301	274.119	0.948	0.372	7031	0		GO:0032722	positive regulation of chemokine production	0.00289	-6.125	0.287	1.602	709.081	0.756	0.376	32722	0		GO:0007033	vacuole organization	0.00231	-0.512	-7.08	1.505	255.458	0.893	0.357	7033	0		GO:0043691	reverse cholesterol transport	0.00065	null	null	0.954	-271.347	0.907	0.716	60620	1
GO:0032722	positive regulation of chemokine production	0.00289	-5.343	-1.65	1.602	709.081	0.743	0.376	32722	0		GO:0001818	negative regulation of cytokine production	0.00628	null	null	1.94	202.429	0.78	0.729	32722	1		GO:0034612	response to tumor necrosis factor	0.00188	0.024	-0.394	1.415	282.704	0.947	0.358	34612	0		GO:0032372	negative regulation of sterol transport	0.00043	null	null	0.778	-150.886	0.786	0.753	60620	1
GO:0045080	positive regulation of chemokine biosynthetic process	0.00123	null	null	1.23	290.55	0.703	0.9	32722	1		GO:0045080	positive regulation of chemokine biosynthetic process	0.00123	null	null	1.23	276.715	0.713	0.9	32722	1		GO:0042535	positive regulation of tumor necrosis factor biosynthetic process	0.00108	5.549	2.799	1.176	282.284	0.731	0.361	42535	0		GO:0032367	intracellular cholesterol transport	0.00036	null	null	0.699	-138.4	0.891	0.74	60620	1
GO:0048286	lung alveolus development	0.00195	-7.56	-1.671	1.431	289.224	0.867	0.376	48286	0		GO:0045073	regulation of chemokine biosynthetic process	0.00137	null	null	1.279	197.653	0.757	0.99	32722	1		GO:0042534	regulation of tumor necrosis factor biosynthetic process	0.00238	null	null	1.519	188.189	0.745	0.936	42535	1		GO:0032366	intracellular sterol transport	0.00036	null	null	0.699	-138.4	0.891	1	60620	1
GO:0043433	negative regulation of sequence-specific DNA binding transcription factor activity	0.00455	2.852	-6.581	1.799	346.154	0.816	0.383	43433	0		GO:0048286	lung alveolus development	0.00195	-7.744	1.49	1.431	248.851	0.87	0.376	48286	0		GO:0045409	negative regulation of interleukin-6 biosynthetic process	0.00123	null	null	1.23	263.943	0.722	0.73	42535	1		GO:0032375	negative regulation of cholesterol transport	0.00043	null	null	0.778	-150.886	0.786	0.933	60620	1
GO:0043154	negative regulation of caspase activity	0.00202	null	null	1.447	357.677	0.81	0.803	43433	1		GO:0051450	myoblast proliferation	0.00058	-1.047	-0.061	0.903	735.047	0.978	0.384	51450	0		GO:0045414	regulation of interleukin-8 biosynthetic process	0.00123	null	null	1.23	212.496	0.755	0.994	42535	1		GO:0060621	negative regulation of cholesterol import	0.00014	null	null	0.301	-301.773	0.789	0.917	60620	1
GO:0010466	negative regulation of peptidase activity	0.00953	null	null	2.121	344.799	0.844	0.71	43433	1		GO:0010939	regulation of necrotic cell death	0.00051	0.014	0.788	0.845	721.511	0.879	0.387	10939	0		GO:0045416	positive regulation of interleukin-8 biosynthetic process	0.00115	null	null	1.204	212.496	0.73	0.792	42535	1		GO:0032845	negative regulation of homeostatic process	0.00087	-0.196	0.843	1.079	-141.269	0.824	0.382	32845	0
GO:0051450	myoblast proliferation	0.00058	-0.56	-1.02	0.903	851.073	0.976	0.384	51450	0		GO:0060545	positive regulation of necroptosis	0.00022	null	null	0.477	721.511	0.835	1	10939	1		GO:0019374	galactolipid metabolic process	0.00029	-0.87	0.588	0.602	466.702	0.911	0.368	19374	0		GO:0002011	morphogenesis of an epithelial sheet	0.00029	6.567	1.276	0.602	-146.277	0.897	0.383	2011	0
GO:0010939	regulation of necrotic cell death	0.00051	1.359	-0.19	0.845	721.511	0.859	0.387	10939	0		GO:0060544	regulation of necroptosis	0.00022	null	null	0.477	721.511	0.883	1	10939	1		GO:0006664	glycolipid metabolic process	0.00108	null	null	1.176	229.827	0.907	0.766	19374	1		GO:0009263	deoxyribonucleotide biosynthetic process	0.00043	-2.552	-4.899	0.778	-279.651	0.879	0.391	9263	0
GO:0060545	positive regulation of necroptosis	0.00022	null	null	0.477	721.511	0.81	1	10939	1		GO:0060553	induction of necroptosis	0.00022	null	null	0.477	721.511	0.835	1	10939	1		GO:0006681	galactosylceramide metabolic process	0.00022	null	null	0.477	466.702	0.912	0.822	19374	1		GO:0009211	pyrimidine deoxyribonucleoside triphosphate metabolic process	0.00058	null	null	0.903	-135.236	0.891	0.866	9263	1
GO:0060544	regulation of necroptosis	0.00022	null	null	0.477	721.511	0.864	1	10939	1		GO:0060555	induction of necroptosis by extracellular signals	0.00022	null	null	0.477	721.511	0.835	0.93	10939	1		GO:0006684	sphingomyelin metabolic process	0.00051	null	null	0.845	417.889	0.908	0.702	19374	1		GO:0046080	dUTP metabolic process	0.00036	null	null	0.699	-144.861	0.894	0.94	9263	1
GO:0060553	induction of necroptosis	0.00022	null	null	0.477	721.511	0.81	1	10939	1		GO:0010940	positive regulation of necrotic cell death	0.00036	null	null	0.699	721.511	0.831	0.961	10939	1		GO:0006677	glycosylceramide metabolic process	0.00029	null	null	0.602	466.702	0.911	0.837	19374	1		GO:0009132	nucleoside diphosphate metabolic process	0.0018	-2.911	-5.397	1.398	-203.045	0.891	0.392	9132	0
GO:0060555	induction of necroptosis by extracellular signals	0.00022	null	null	0.477	721.511	0.81	0.93	10939	1		GO:0006921	cellular component disassembly involved in apoptosis	0.00137	1.427	-0.821	1.279	286.545	0.925	0.387	6921	0		GO:0006687	glycosphingolipid metabolic process	0.00079	null	null	1.041	229.827	0.906	0.892	19374	1		GO:0008634	negative regulation of survival gene product expression	0.00051	-0.492	-4.498	0.845	-268.483	0.772	0.392	8634	0
GO:0010940	positive regulation of necrotic cell death	0.00036	null	null	0.699	721.511	0.806	0.961	10939	1		GO:0007044	cell-substrate junction assembly	0.00152	1.792	-1.74	1.322	176.139	0.955	0.388	7044	0		GO:0048284	organelle fusion	0.00144	-0.693	-7.318	1.301	188.163	0.896	0.379	48284	0		GO:0010507	negative regulation of autophagy	0.00036	-1.316	-4.48	0.699	-183.251	0.797	0.396	10507	0
GO:0006921	cellular component disassembly involved in apoptosis	0.00137	2.348	2.314	1.279	541.073	0.903	0.387	6921	0		GO:0050995	negative regulation of lipid catabolic process	0.00065	2.527	3.262	0.954	878.002	0.805	0.4	50995	0		GO:0009132	nucleoside diphosphate metabolic process	0.0018	-3.05	5.324	1.398	203.045	0.895	0.395	9132	0		GO:0010506	regulation of autophagy	0.00072	null	null	1	-122.167	0.845	0.84	10507	1
GO:0006309	DNA fragmentation involved in apoptotic nuclear change	0.00101	null	null	1.146	541.073	0.838	0.803	6921	1		GO:0045833	negative regulation of lipid metabolic process	0.00224	null	null	1.491	273.191	0.803	0.774	50995	1		GO:0008634	negative regulation of survival gene product expression	0.00051	-0.763	2.43	0.845	495.453	0.8	0.396	8634	0		GO:0016236	macroautophagy	0.00137	null	null	1.279	-174.006	0.818	0.8	10507	1
GO:0006379	mRNA cleavage	0.00072	null	null	1	410.141	0.935	0.844	6921	1		GO:0050994	regulation of lipid catabolic process	0.00144	null	null	1.301	412.403	0.82	0.705	50995	1		GO:0006265	DNA topological change	0.00058	-1.358	3.852	0.903	305.16	0.911	0.396	6265	0		GO:0016242	negative regulation of macroautophagy	0.00022	null	null	0.477	-183.251	0.714	0.883	10507	1
GO:0030262	apoptotic nuclear change	0.00123	null	null	1.23	486.966	0.903	0.968	6921	1		GO:0006308	DNA catabolic process	0.00245	3.481	5.261	1.531	208.326	0.92	0.402	6308	0		GO:0046825	regulation of protein export from nucleus	0.00051	-2.022	-4.498	0.845	312.894	0.855	0.402	46825	0		GO:0016241	regulation of macroautophagy	0.00029	null	null	0.602	-122.167	0.753	0.899	10507	1
GO:0000737	DNA catabolic process, endonucleolytic	0.00101	null	null	1.146	368.121	0.92	0.869	6921	1		GO:0032225	regulation of synaptic transmission, dopaminergic	0.00051	-6.224	-0.544	0.845	386.792	0.799	0.408	32225	0		GO:0015695	organic cation transport	0.00115	-1.868	-4.108	1.204	302.959	0.947	0.403	15695	0		GO:0009267	cellular response to starvation	0.00289	null	null	1.602	-141.114	0.854	0.929	10507	1
GO:0007044	cell-substrate junction assembly	0.00152	1.77	2.728	1.322	286.826	0.948	0.388	7044	0		GO:0032228	regulation of synaptic transmission, GABAergic	0.00022	null	null	0.477	207.711	0.809	0.741	32225	1		GO:0001783	B cell apoptosis	0.00079	1.087	-0.626	1.041	247.726	0.969	0.406	1783	0		GO:0006266	DNA ligation	0.00065	-1.549	-4.097	0.954	-127.795	0.915	0.399	6266	0
GO:0050995	negative regulation of lipid catabolic process	0.00065	2.033	-5.3	0.954	1119.42	0.795	0.4	50995	0		GO:0033209	tumor necrosis factor-mediated signaling pathway	0.0013	1.413	-1.951	1.255	320.418	0.853	0.416	33209	0		GO:0070227	lymphocyte apoptosis	0.00188	null	null	1.415	221.774	0.968	0.934	1783	1		GO:0046825	regulation of protein export from nucleus	0.00051	-2.13	3.958	0.845	-312.894	0.837	0.402	46825	0
GO:0045833	negative regulation of lipid metabolic process	0.00224	null	null	1.491	476.748	0.799	0.774	50995	1		GO:0060068	vagina development	0.00058	-6.091	1.773	0.903	285.515	0.886	0.42	60068	0		GO:0002250	adaptive immune response	0.00816	2.87	1.973	2.053	205.762	0.878	0.412	2250	0		GO:0001783	B cell apoptosis	0.00079	-0.158	-0.283	1.041	-134.241	0.976	0.406	1783	0
GO:0050994	regulation of lipid catabolic process	0.00144	null	null	1.301	533.112	0.811	0.705	50995	1		GO:0000768	syncytium formation by plasma membrane fusion	0.00029	-6.204	2.821	0.602	260.693	0.918	0.42	768	0		GO:0019344	cysteine biosynthetic process	0.00014	-2.665	4.925	0.301	415.97	0.886	0.416	19344	0		GO:0048549	positive regulation of pinocytosis	0.00014	-2.792	6.186	0.301	-158.935	0.763	0.412	48549	0
GO:0045444	fat cell differentiation	0.00455	-5.721	-2.765	1.799	276.51	0.903	0.402	45444	0		GO:0007520	myoblast fusion	0.00022	null	null	0.477	260.693	0.912	0.955	768	1		GO:0015012	heparan sulfate proteoglycan biosynthetic process	0.00058	null	null	0.903	202.689	0.916	0.706	19344	1		GO:0010873	positive regulation of cholesterol esterification	0.00058	-1.593	-3.827	0.903	-237.289	0.776	0.417	10873	0
GO:0032225	regulation of synaptic transmission, dopaminergic	0.00051	-5.857	-0.035	0.845	386.792	0.801	0.413	32225	0		GO:0070231	T cell apoptosis	0.00123	-0.046	1.343	1.23	176.582	0.951	0.422	70231	0		GO:0030201	heparan sulfate proteoglycan metabolic process	0.00058	null	null	0.903	202.689	0.931	0.817	19344	1		GO:0045540	regulation of cholesterol biosynthetic process	0.00058	null	null	0.903	-153.181	0.795	0.76	10873	1
GO:0060055	angiogenesis involved in wound healing	0.00014	-6.744	-1.362	0.301	1437.08	0.789	0.42	60055	0		GO:0006924	activation-induced cell death of T cells	0.00043	null	null	0.778	176.582	0.843	0.867	70231	1		GO:0010873	positive regulation of cholesterol esterification	0.00058	-1.512	2.23	0.903	237.289	0.804	0.417	10873	0		GO:0045541	negative regulation of cholesterol biosynthetic process	0.00029	null	null	0.602	-153.181	0.753	0.914	10873	1
GO:0000768	syncytium formation by plasma membrane fusion	0.00029	-5.773	-2.901	0.602	260.693	0.91	0.42	768	0		GO:0032331	negative regulation of chondrocyte differentiation	0.00072	-7.994	0.565	1	882.328	0.77	0.426	32331	0		GO:0045834	positive regulation of lipid metabolic process	0.00303	null	null	1.623	182.356	0.798	0.739	10873	1		GO:0043551	regulation of phosphatidylinositol 3-kinase activity	0.00022	null	null	0.477	-224.454	0.828	0.966	10873	1
GO:0007520	myoblast fusion	0.00022	null	null	0.477	260.693	0.899	0.955	768	1		GO:0032330	regulation of chondrocyte differentiation	0.00137	null	null	1.279	499.72	0.776	0.912	32331	1		GO:0045540	regulation of cholesterol biosynthetic process	0.00058	null	null	0.903	206.581	0.806	0.76	10873	1		GO:0043552	positive regulation of phosphatidylinositol 3-kinase activity	0.00022	null	null	0.477	-224.454	0.792	0.727	10873	1
GO:0043279	response to alkaloid	0.00159	0.181	4.721	1.342	338.873	0.908	0.422	43279	0		GO:0048871	multicellular organismal homeostasis	0.00635	-7.054	0.198	1.944	265.503	0.835	0.426	48871	0		GO:0045541	negative regulation of cholesterol biosynthetic process	0.00029	null	null	0.602	206.581	0.778	0.914	10873	1		GO:0034435	cholesterol esterification	0.00087	null	null	1.079	-119.146	0.9	0.979	10873	1
GO:0032331	negative regulation of chondrocyte differentiation	0.00072	-7.416	-1.951	1	964.466	0.758	0.426	32331	0		GO:0051797	regulation of hair follicle development	0.00051	-8.314	1.462	0.845	678.628	0.798	0.43	51797	0		GO:0043551	regulation of phosphatidylinositol 3-kinase activity	0.00022	null	null	0.477	224.454	0.838	0.966	10873	1		GO:0034434	sterol esterification	0.00087	null	null	1.079	-119.146	0.9	0.999	10873	1
GO:0032330	regulation of chondrocyte differentiation	0.00137	null	null	1.279	561.324	0.769	0.912	32331	1		GO:0051798	positive regulation of hair follicle development	0.00036	null	null	0.699	678.628	0.757	0.978	51797	1		GO:0043552	positive regulation of phosphatidylinositol 3-kinase activity	0.00022	null	null	0.477	224.454	0.809	0.727	10873	1		GO:0034433	steroid esterification	0.00087	null	null	1.079	-119.146	0.904	0.719	10873	1
GO:0048871	multicellular organismal homeostasis	0.00635	-6.897	-0.228	1.944	305.863	0.833	0.426	48871	0		GO:0042634	regulation of hair cycle	0.00051	null	null	0.845	678.628	0.84	0.752	51797	1		GO:0010872	regulation of cholesterol esterification	0.00065	null	null	0.954	237.289	0.835	0.952	10873	1		GO:0010872	regulation of cholesterol esterification	0.00065	null	null	0.954	-237.289	0.815	0.952	10873	1
GO:0051797	regulation of hair follicle development	0.00051	-8.022	-1.814	0.845	739.534	0.791	0.43	51797	0		GO:0045684	positive regulation of epidermis development	0.00051	null	null	0.845	452.419	0.757	0.899	51797	1		GO:0060045	positive regulation of cardiac muscle cell proliferation	0.00036	7.028	-0.64	0.699	261.603	0.746	0.418	60045	0		GO:0006067	ethanol metabolic process	0.00022	-2.438	-3.444	0.477	-131.78	0.926	0.419	6067	0
GO:0051798	positive regulation of hair follicle development	0.00036	null	null	0.699	739.534	0.739	0.978	51797	1		GO:0050917	sensory perception of umami taste	0.00022	-7.581	0.567	0.477	218.464	0.902	0.432	50917	0		GO:0060415	muscle tissue morphogenesis	0.00195	null	null	1.431	202.792	0.825	0.973	60045	1		GO:0034308	primary alcohol metabolic process	0.00022	-2.878	-3.811	0.477	-131.78	0.926	0.419	34308	0
GO:0042634	regulation of hair cycle	0.00051	null	null	0.845	739.534	0.837	0.752	51797	1		GO:0048662	negative regulation of smooth muscle cell proliferation	0.00101	-1.946	-1.831	1.146	397.954	0.871	0.439	48662	0		GO:0055010	ventricular cardiac muscle tissue morphogenesis	0.00137	null	null	1.279	255.041	0.828	0.766	60045	1		GO:0043616	keratinocyte proliferation	0.00065	0.685	0.359	0.954	-131.424	0.978	0.42	43616	0
GO:0045684	positive regulation of epidermis development	0.00051	null	null	0.845	493.023	0.737	0.899	51797	1		GO:0060044	negative regulation of cardiac muscle cell proliferation	0.00022	null	null	0.477	309.64	0.762	0.748	48662	1		GO:0055008	cardiac muscle tissue morphogenesis	0.00188	null	null	1.415	202.792	0.825	0.968	60045	1		GO:0055091	phospholipid homeostasis	0.00029	-0.131	2.419	0.602	-227.851	0.89	0.421	55091	0
GO:0001836	release of cytochrome c from mitochondria	0.00166	3.294	2.829	1.362	391.903	0.902	0.432	1836	0		GO:0046622	positive regulation of organ growth	0.00065	null	null	0.954	197.577	0.861	0.79	48662	1		GO:0046621	negative regulation of organ growth	0.00036	null	null	0.699	184.909	0.883	0.786	60045	1		GO:0033619	membrane protein proteolysis	0.00209	-2.047	0.159	1.462	-244.673	0.942	0.425	33619	0
GO:0008637	apoptotic mitochondrial changes	0.00231	null	null	1.505	316.763	0.9	0.759	1836	1		GO:0048660	regulation of smooth muscle cell proliferation	0.00217	null	null	1.477	324.072	0.891	0.934	48662	1		GO:0048639	positive regulation of developmental growth	0.00087	null	null	1.079	210.875	0.796	0.772	60045	1		GO:0030513	positive regulation of BMP signaling pathway	0.00036	0.293	-2.513	0.699	-256.537	0.828	0.425	30513	0
GO:0050917	sensory perception of umami taste	0.00022	-7.23	-0.583	0.477	294.781	0.908	0.432	50917	0		GO:0048661	positive regulation of smooth muscle cell proliferation	0.00115	null	null	1.204	228.559	0.838	0.944	48662	1		GO:0055091	phospholipid homeostasis	0.00029	-0.017	-2.866	0.602	227.851	0.896	0.421	55091	0		GO:0000185	activation of MAPKKK activity	0.00029	-2.821	-3.133	0.602	-232.65	0.817	0.426	185	0
GO:0048662	negative regulation of smooth muscle cell proliferation	0.00101	-1.147	-0.717	1.146	494.375	0.858	0.439	48662	0		GO:0006097	glyoxylate cycle	0.00014	2.176	5.526	0.301	417.374	0.898	0.44	6097	0		GO:0006907	pinocytosis	0.00072	-1.482	-7.12	1	182.657	0.868	0.423	6907	0		GO:0032410	negative regulation of transporter activity	0.00065	-2.765	2.1	0.954	-233.344	0.794	0.426	32410	0
GO:0060420	regulation of heart growth	0.00072	null	null	1	277.553	0.787	0.946	48662	1		GO:0042574	retinal metabolic process	0.00043	null	null	0.778	195.707	0.876	0.822	6097	1		GO:0033619	membrane protein proteolysis	0.00209	-1.872	0.419	1.462	351.056	0.94	0.425	33619	0		GO:0045843	negative regulation of striated muscle tissue development	0.00072	7.138	0.172	1	-171.59	0.723	0.426	45843	0
GO:0060043	regulation of cardiac muscle cell proliferation	0.00065	null	null	0.954	277.553	0.757	0.93	48662	1		GO:0046487	glyoxylate metabolic process	0.00029	null	null	0.602	278.249	0.92	0.769	6097	1		GO:0030513	positive regulation of BMP signaling pathway	0.00036	0.178	1.262	0.699	256.537	0.829	0.425	30513	0		GO:0048635	negative regulation of muscle organ development	0.00072	null	null	1	-171.59	0.725	0.842	45843	1
GO:0060044	negative regulation of cardiac muscle cell proliferation	0.00022	null	null	0.477	309.64	0.751	0.748	48662	1		GO:0043288	apocarotenoid metabolic process	0.00043	1.484	2.82	0.778	195.707	0.914	0.442	43288	0		GO:0032410	negative regulation of transporter activity	0.00065	-3.445	-2.885	0.954	233.344	0.825	0.426	32410	0		GO:0051131	chaperone-mediated protein complex assembly	0.00051	-1.368	6.832	0.845	-264.308	0.9	0.427	51131	0
GO:0055021	regulation of cardiac muscle tissue growth	0.00065	null	null	0.954	277.553	0.78	0.985	48662	1		GO:0007492	endoderm development	0.00152	-5.64	2.367	1.322	419.242	0.917	0.444	7492	0		GO:0051131	chaperone-mediated protein complex assembly	0.00051	-0.281	-6.821	0.845	288.372	0.888	0.427	51131	0		GO:0009262	deoxyribonucleotide metabolic process	0.00137	-2.645	-4.821	1.279	-149.404	0.893	0.427	9262	0
GO:0055024	regulation of cardiac muscle tissue development	0.00072	null	null	1	277.553	0.784	0.777	48662	1		GO:0060347	heart trabecula formation	0.00036	-7.242	1.607	0.699	174.365	0.872	0.444	60347	0		GO:0034367	macromolecular complex remodeling	0.00094	-0.949	-7.51	1.114	208.228	0.902	0.43	34367	0		GO:0034367	macromolecular complex remodeling	0.00094	-1.984	7.339	1.114	-151.647	0.914	0.43	34367	0
GO:0048660	regulation of smooth muscle cell proliferation	0.00217	null	null	1.477	421.581	0.881	0.934	48662	1		GO:0002861	regulation of inflammatory response to antigenic stimulus	0.00123	-0.188	-3.796	1.23	1280.3	0.749	0.453	2861	0		GO:0050910	detection of mechanical stimulus involved in sensory perception of sound	0.00036	6.318	0.218	0.699	577.701	0.803	0.431	50910	0		GO:0050910	detection of mechanical stimulus involved in sensory perception of sound	0.00036	6.587	0.967	0.699	-577.701	0.81	0.431	50910	0
GO:0048661	positive regulation of smooth muscle cell proliferation	0.00115	null	null	1.204	331.815	0.818	0.944	48662	1		GO:0050930	induction of positive chemotaxis	0.00137	null	null	1.279	188.913	0.717	0.803	2861	1		GO:0050906	detection of stimulus involved in sensory perception	0.00144	null	null	1.301	279.515	0.841	0.82	50910	1		GO:0016045	detection of bacterium	0.00087	null	null	1.079	-209.161	0.907	0.748	50910	1
GO:0006097	glyoxylate cycle	0.00014	1.823	-5.036	0.301	417.374	0.913	0.44	6097	0		GO:0001798	positive regulation of type IIa hypersensitivity	0.00051	null	null	0.845	1159.14	0.701	0.921	2861	1		GO:0016045	detection of bacterium	0.00087	null	null	1.079	225.558	0.878	0.789	50910	1		GO:0050982	detection of mechanical stimulus	0.00094	null	null	1.114	-346.62	0.906	0.87	50910	1
GO:0046487	glyoxylate metabolic process	0.00029	null	null	0.602	278.249	0.936	0.769	6097	1		GO:0002894	positive regulation of type II hypersensitivity	0.00051	null	null	0.845	1159.14	0.701	0.999	2861	1		GO:0009582	detection of abiotic stimulus	0.00267	null	null	1.568	189.216	0.922	0.919	50910	1		GO:0050974	detection of mechanical stimulus involved in sensory perception	0.00079	null	null	1.041	-433.276	0.801	0.925	50910	1
GO:0051897	positive regulation of protein kinase B signaling cascade	0.00238	3.36	-0.505	1.519	680.321	0.736	0.443	51897	0		GO:0002892	regulation of type II hypersensitivity	0.00051	null	null	0.845	1159.14	0.736	0.999	2861	1		GO:0009581	detection of external stimulus	0.00361	null	null	1.699	192.259	0.874	0.882	50910	1		GO:0006268	DNA unwinding involved in replication	0.00051	-1.361	-4.72	0.845	-122.569	0.908	0.433	6268	0
GO:0051896	regulation of protein kinase B signaling cascade	0.00281	null	null	1.591	484.419	0.789	0.975	51897	1		GO:0002891	positive regulation of immunoglobulin mediated immune response	0.00115	null	null	1.204	579.572	0.743	0.941	2861	1		GO:0009595	detection of biotic stimulus	0.00166	null	null	1.362	297.061	0.931	0.741	50910	1		GO:0002475	antigen processing and presentation via MHC class Ib	0.00058	3.924	-1.247	0.903	-176.841	0.916	0.435	2475	0
GO:0007492	endoderm development	0.00152	-5.452	-2.556	1.322	429.333	0.902	0.444	7492	0		GO:0002885	positive regulation of hypersensitivity	0.00065	null	null	0.954	1159.14	0.717	0.983	2861	1		GO:0050982	detection of mechanical stimulus	0.00094	null	null	1.114	346.62	0.878	0.87	50910	1		GO:0042053	regulation of dopamine metabolic process	0.00058	-3.295	-6.127	0.903	-186.91	0.809	0.445	42053	0
GO:0033209	tumor necrosis factor-mediated signaling pathway	0.0013	0.644	4.582	1.255	320.418	0.84	0.449	33209	0		GO:0002888	positive regulation of myeloid leukocyte mediated immunity	0.00051	null	null	0.845	1159.14	0.79	0.952	2861	1		GO:0050974	detection of mechanical stimulus involved in sensory perception	0.00079	null	null	1.041	433.276	0.793	0.925	50910	1		GO:0042069	regulation of catecholamine metabolic process	0.00058	null	null	0.903	-186.91	0.809	0.969	42053	1
GO:0002886	regulation of myeloid leukocyte mediated immunity	0.00072	-2.31	1.2	1	813.692	0.787	0.451	2886	0		GO:0002883	regulation of hypersensitivity	0.00072	null	null	1	657.354	0.752	0.992	2861	1		GO:0002475	antigen processing and presentation via MHC class Ib	0.00058	3.451	2.058	0.903	231.271	0.922	0.435	2475	0		GO:0045745	positive regulation of G-protein coupled receptor protein signaling pathway	0.00036	0.263	-2.331	0.699	-126.422	0.828	0.452	45745	0
GO:0001914	regulation of T cell mediated cytotoxicity	0.00115	null	null	1.204	410.035	0.659	0.99	2886	1		GO:0001796	regulation of type IIa hypersensitivity	0.00051	null	null	0.845	1159.14	0.736	0.999	2861	1		GO:0010623	developmental programmed cell death	0.00115	7.149	-0.242	1.204	183.953	0.862	0.447	10623	0		GO:0001562	response to protozoan	0.00094	0.281	0.408	1.114	-176.446	0.963	0.456	1562	0
GO:0001916	positive regulation of T cell mediated cytotoxicity	0.00115	null	null	1.204	410.035	0.652	0.844	2886	1		GO:0050727	regulation of inflammatory response	0.00779	null	null	2.033	264.176	0.772	0.73	2861	1		GO:0009306	protein secretion	0.00484	-2.092	-4.727	1.826	228.07	0.917	0.448	9306	0		GO:0031579	membrane raft organization	0.00029	-1.61	6.833	0.602	-158.935	0.911	0.458	31579	0
GO:0002821	positive regulation of adaptive immune response	0.00325	null	null	1.653	336.887	0.692	0.929	2886	1		GO:0050729	positive regulation of inflammatory response	0.00267	null	null	1.568	586.824	0.737	0.796	2861	1		GO:0042159	lipoprotein catabolic process	0.00036	-1.776	2.055	0.699	230.727	0.915	0.451	42159	0		GO:0045742	positive regulation of epidermal growth factor receptor signaling pathway	0.00051	0.264	-2.33	0.845	-126.422	0.825	0.461	45742	0
GO:0002824	positive regulation of adaptive immune response based on somatic recombination of immune receptors built from immunoglobulin superfamily domains	0.00325	null	null	1.653	336.887	0.69	0.914	2886	1		GO:0002864	regulation of acute inflammatory response to antigenic stimulus	0.00072	null	null	1	657.354	0.752	0.999	2861	1		GO:0001562	response to protozoan	0.00094	0.538	-0.428	1.114	176.446	0.952	0.456	1562	0		GO:0045059	positive thymic T cell selection	0.00065	7.235	0.081	0.954	-315.44	0.749	0.462	45059	0
GO:0002855	regulation of natural killer cell mediated immune response to tumor cell	0.00043	null	null	0.778	286.33	0.711	1	2886	1		GO:0002863	positive regulation of inflammatory response to antigenic stimulus	0.00087	null	null	1.079	1159.14	0.715	0.957	2861	1		GO:0048585	negative regulation of response to stimulus	0.02295	-1.382	1.251	2.502	287.691	0.803	0.458	48585	0		GO:0045061	thymic T cell selection	0.00108	null	null	1.176	-164.448	0.741	0.935	45059	1
GO:0002860	positive regulation of natural killer cell mediated cytotoxicity directed against tumor cell target	0.00043	null	null	0.778	286.33	0.639	0.859	2886	1		GO:0002862	negative regulation of inflammatory response to antigenic stimulus	0.00036	null	null	0.699	1409.67	0.744	0.9	2861	1		GO:0045604	regulation of epidermal cell differentiation	0.00043	7.578	-0.386	0.778	224.699	0.779	0.461	45604	0		GO:0043383	negative T cell selection	0.00072	null	null	1	-265.086	0.747	0.896	45059	1
GO:0002858	regulation of natural killer cell mediated cytotoxicity directed against tumor cell target	0.00043	null	null	0.778	286.33	0.645	1	2886	1		GO:0002866	positive regulation of acute inflammatory response to antigenic stimulus	0.00065	null	null	0.954	1159.14	0.717	0.985	2861	1		GO:0033238	regulation of cellular amine metabolic process	0.00072	-2.172	3.999	1	186.91	0.857	0.462	33238	0		GO:0045060	negative thymic T cell selection	0.00065	null	null	0.954	-265.086	0.749	0.929	45059	1
GO:0002857	positive regulation of natural killer cell mediated immune response to tumor cell	0.00043	null	null	0.778	286.33	0.675	1	2886	1		GO:0002673	regulation of acute inflammatory response	0.00173	null	null	1.38	493.016	0.784	0.852	2861	1		GO:0045059	positive thymic T cell selection	0.00065	7.199	0.746	0.954	359.809	0.772	0.462	45059	0		GO:0043368	positive T cell selection	0.00079	null	null	1.041	-255.676	0.746	0.909	45059	1
GO:0002714	positive regulation of B cell mediated immunity	0.00115	null	null	1.204	610.269	0.689	0.769	2886	1		GO:0002675	positive regulation of acute inflammatory response	0.00123	null	null	1.23	1159.14	0.741	0.719	2861	1		GO:0033089	positive regulation of T cell differentiation in thymus	0.00036	null	null	0.699	248.741	0.698	0.74	45059	1		GO:0006003	fructose 2,6-bisphosphate metabolic process	0.00043	-2.249	-3.119	0.778	-136.237	0.901	0.465	6003	0
GO:0002708	positive regulation of lymphocyte mediated immunity	0.00346	null	null	1.681	280.272	0.718	0.908	2886	1		GO:0010470	regulation of gastrulation	0.00115	-7.775	1.367	1.204	709.081	0.796	0.456	10470	0		GO:0045061	thymic T cell selection	0.00108	null	null	1.176	181.086	0.765	0.935	45059	1		GO:0015802	basic amino acid transport	0.00079	-2.117	3.853	1.041	-285.299	0.922	0.47	15802	0
GO:0002705	positive regulation of leukocyte mediated immunity	0.00346	null	null	1.681	280.272	0.72	0.951	2886	1		GO:0034114	regulation of heterotypic cell-cell adhesion	0.00029	null	null	0.602	709.081	0.897	0.779	10470	1		GO:0043383	negative T cell selection	0.00072	null	null	1	265.086	0.771	0.909	45059	1		GO:0060192	negative regulation of lipase activity	0.00043	-1.991	-3.035	0.778	-150.886	0.874	0.473	60192	0
GO:0010470	regulation of gastrulation	0.00115	-7.558	-1.671	1.204	709.081	0.79	0.456	10470	0		GO:0022409	positive regulation of cell-cell adhesion	0.00072	null	null	1	623.354	0.834	0.825	10470	1		GO:0045060	negative thymic T cell selection	0.00065	null	null	0.954	265.086	0.772	0.929	45059	1		GO:0007162	negative regulation of cell adhesion	0.00267	0.663	-0.937	1.568	-155.249	0.833	0.474	7162	0
GO:0034114	regulation of heterotypic cell-cell adhesion	0.00029	null	null	0.602	709.081	0.894	0.779	10470	1		GO:0070587	regulation of cell-cell adhesion involved in gastrulation	0.00029	null	null	0.602	709.081	0.783	0.772	10470	1		GO:0043368	positive T cell selection	0.00079	null	null	1.041	288.953	0.77	0.902	45059	1		GO:0001953	negative regulation of cell-matrix adhesion	0.00065	null	null	0.954	-164.08	0.846	0.716	7162	1
GO:0022409	positive regulation of cell-cell adhesion	0.00072	null	null	1	623.354	0.823	0.825	10470	1		GO:0048013	ephrin receptor signaling pathway	0.00022	0.148	-2.118	0.477	491.193	0.89	0.456	48013	0		GO:0000186	activation of MAPKK activity	0.00101	-2.869	2.94	1.146	253.604	0.803	0.463	186	0		GO:0051893	regulation of focal adhesion assembly	0.00036	null	null	0.699	-132.024	0.828	0.837	7162	1
GO:0070587	regulation of cell-cell adhesion involved in gastrulation	0.00029	null	null	0.602	709.081	0.781	0.772	10470	1		GO:0051897	positive regulation of protein kinase B signaling cascade	0.00238	-0.433	-3.473	1.519	625.503	0.763	0.457	51897	0		GO:0060620	regulation of cholesterol import	0.00022	-2.473	-4.815	0.477	301.773	0.857	0.47	60620	0		GO:0010812	negative regulation of cell-substrate adhesion	0.00123	null	null	1.23	-123.06	0.84	0.842	7162	1
GO:0009311	oligosaccharide metabolic process	0.00137	0.939	-2.6	1.279	2513.37	0.943	0.459	9311	0		GO:0051896	regulation of protein kinase B signaling cascade	0.00281	null	null	1.591	386.13	0.814	0.975	51897	1		GO:0043691	reverse cholesterol transport	0.00065	null	null	0.954	271.347	0.925	0.716	60620	1		GO:0006290	pyrimidine dimer repair	0.00029	-1.106	-4.952	0.602	-205.679	0.88	0.474	6290	0
GO:0045429	positive regulation of nitric oxide biosynthetic process	0.00202	3.647	-5.991	1.447	292	0.776	0.463	45429	0		GO:0009311	oligosaccharide metabolic process	0.00137	0.671	1.389	1.279	2424.32	0.941	0.459	9311	0		GO:0033344	cholesterol efflux	0.00224	null	null	1.491	193.422	0.919	0.84	60620	1		GO:0045685	regulation of glial cell differentiation	0.00065	7.209	1.022	0.954	-387.442	0.752	0.476	45685	0
GO:0032094	response to food	0.00318	0.789	5.084	1.643	287.3	0.856	0.463	32094	0		GO:0007190	activation of adenylate cyclase activity	0.00152	3.285	6.45	1.322	229.089	0.799	0.47	7190	0		GO:0060621	negative regulation of cholesterol import	0.00014	null	null	0.301	301.773	0.827	0.917	60620	1		GO:0014013	regulation of gliogenesis	0.00072	null	null	1	-387.442	0.751	0.766	45685	1
GO:0033280	response to vitamin D	0.00065	null	null	0.954	278.371	0.871	0.708	32094	1		GO:0031281	positive regulation of cyclase activity	0.00173	null	null	1.38	208.263	0.859	0.9	7190	1		GO:0007162	negative regulation of cell adhesion	0.00267	-0.759	-0.026	1.568	191.549	0.869	0.474	7162	0		GO:0000272	polysaccharide catabolic process	0.00152	-1.653	-1.458	1.322	-181.948	0.923	0.482	272	0
GO:0009082	branched chain family amino acid biosynthetic process	0.00029	2.567	-6.759	0.602	273.591	0.91	0.471	9082	0		GO:0051349	positive regulation of lyase activity	0.00188	null	null	1.415	190.908	0.858	0.898	7190	1		GO:0001825	blastocyst formation	0.0013	7.884	-0.616	1.255	199.376	0.849	0.474	1825	0		GO:0008653	lipopolysaccharide metabolic process	0.00051	null	null	0.845	-157.197	0.894	0.717	272	1
GO:0060136	embryonic process involved in female pregnancy	0.00058	-7.474	-0.778	0.903	360.097	0.821	0.475	60136	0		GO:0007191	activation of adenylate cyclase activity by dopamine receptor signaling pathway	0.00022	null	null	0.477	181.541	0.786	0.856	7190	1		GO:0001829	trophectodermal cell differentiation	0.00094	null	null	1.114	203.709	0.837	0.856	1825	1		GO:0006030	chitin metabolic process	0.00065	null	null	0.954	-160.766	0.91	0.772	272	1
GO:0006414	translational elongation	0.0039	2.093	-4.677	1.732	450.131	0.925	0.481	6414	0		GO:0045762	positive regulation of adenylate cyclase activity	0.00166	null	null	1.362	229.089	0.798	0.985	7190	1		GO:0006290	pyrimidine dimer repair	0.00029	-1.283	4.392	0.602	205.679	0.879	0.474	6290	0		GO:0006032	chitin catabolic process	0.00058	null	null	0.903	-160.766	0.894	0.724	272	1
GO:0015904	tetracycline transport	0.00043	1.375	7.134	0.778	327.055	0.857	0.489	15904	0		GO:0006419	alanyl-tRNA aminoacylation	0.00029	3.001	6.328	0.602	248.752	0.888	0.471	6419	0		GO:0021877	forebrain neuron fate commitment	0.00036	7.73	-0.541	0.699	460.916	0.825	0.476	21877	0		GO:0046340	diacylglycerol catabolic process	7e-05	-3.83	-5.401	0	-301.773	0.882	0.483	46340	0
GO:0050433	regulation of catecholamine secretion	0.00058	null	null	0.903	260.13	0.813	0.797	15904	1		GO:0009082	branched chain family amino acid biosynthetic process	0.00029	3.064	6.76	0.602	273.591	0.898	0.471	9082	0		GO:0021879	forebrain neuron differentiation	0.00072	null	null	1	307.278	0.826	0.883	21877	1		GO:0033238	regulation of cellular amine metabolic process	0.00072	-2.081	-4.476	1	-186.91	0.837	0.485	33238	0
GO:0014070	response to organic cyclic compound	0.00397	0.161	4.605	1.74	265.353	0.902	0.49	14070	0		GO:0043154	negative regulation of caspase activity	0.00202	2.502	3.6	1.447	262.595	0.83	0.474	43154	0		GO:0008544	epidermis development	0.00693	8.543	-0.363	1.982	175.45	0.827	0.479	8544	0		GO:0030307	positive regulation of cell growth	0.00166	-1.553	5.251	1.362	-215.063	0.761	0.485	30307	0
GO:0033627	cell adhesion mediated by integrin	0.00108	-0.12	0.048	1.176	276.628	0.966	0.491	33627	0		GO:0010466	negative regulation of peptidase activity	0.00953	null	null	2.121	213.446	0.849	0.803	43154	1		GO:0046340	diacylglycerol catabolic process	7e-05	-4.083	5.672	0	301.773	0.871	0.483	46340	0		GO:0045793	positive regulation of cell size	0.00173	null	null	1.38	-193.557	0.833	0.712	30307	1
GO:0045924	regulation of female receptivity	0.00022	-7.052	0.86	0.477	272.311	0.786	0.496	45924	0		GO:0014070	response to organic cyclic compound	0.00397	1.434	-0.933	1.74	265.353	0.916	0.482	14070	0		GO:0046464	acylglycerol catabolic process	0.00094	null	null	1.114	207.468	0.85	0.844	46340	1		GO:0032098	regulation of appetite	0.00217	0.149	1.367	1.477	-304.015	0.811	0.491	32098	0
GO:0060180	female mating behavior	0.00022	null	null	0.477	272.311	0.816	0.966	45924	1		GO:0043279	response to alkaloid	0.00159	1.429	-0.884	1.342	229.739	0.921	0.49	43279	0		GO:0006094	gluconeogenesis	0.00238	-2.325	4.001	1.519	278.858	0.868	0.489	6094	0		GO:0042594	response to starvation	0.00303	null	null	1.623	-141.114	0.884	0.776	32098	1
GO:0046325	negative regulation of glucose import	0.00058	0.867	4.941	0.903	341.152	0.816	0.498	46325	0		GO:0002886	regulation of myeloid leukocyte mediated immunity	0.00072	-1.188	-3.772	1	772.763	0.831	0.491	2886	0		GO:0046364	monosaccharide biosynthetic process	0.00281	null	null	1.591	199.681	0.867	0.913	6094	1		GO:0032104	regulation of response to extracellular stimulus	0.00231	null	null	1.505	-216.445	0.823	0.739	32098	1
GO:0010829	negative regulation of glucose transport	0.00072	null	null	1	272.921	0.813	0.829	46325	1		GO:0002889	regulation of immunoglobulin mediated immune response	0.00202	null	null	1.447	234.538	0.777	0.955	2886	1		GO:0019319	hexose biosynthetic process	0.00253	null	null	1.544	232.961	0.867	0.974	6094	1		GO:0007095	mitotic cell cycle G2/M transition DNA damage checkpoint	0.00022	-0.147	-1.45	0.477	-151.848	0.83	0.491	7095	0
GO:0010661	positive regulation of muscle cell apoptosis	0.00043	3.665	-1.661	0.778	286.33	0.809	0.499	10661	0		GO:0002821	positive regulation of adaptive immune response	0.00325	null	null	1.653	188.143	0.743	0.929	2886	1		GO:0001678	cellular glucose homeostasis	0.00065	-0.16	-1.957	0.954	294.651	0.884	0.494	1678	0		GO:0050885	neuromuscular process controlling balance	0.00209	7.197	1.261	1.462	-169.727	0.87	0.491	50885	0
GO:0034391	regulation of smooth muscle cell apoptosis	0.00079	null	null	1.041	269.692	0.861	0.936	10661	1		GO:0002824	positive regulation of adaptive immune response based on somatic recombination of immune receptors built from immunoglobulin superfamily domains	0.00325	null	null	1.653	188.143	0.742	0.914	2886	1		GO:0032803	regulation of low-density lipoprotein particle receptor catabolic process	0.00043	-4.401	4.731	0.778	179.881	0.828	0.499	32803	0		GO:0001678	cellular glucose homeostasis	0.00065	-0.217	1.456	0.954	-294.651	0.878	0.494	1678	0
GO:0034393	positive regulation of smooth muscle cell apoptosis	0.00043	null	null	0.778	286.33	0.809	0.959	10661	1		GO:0002714	positive regulation of B cell mediated immunity	0.00115	null	null	1.204	579.572	0.744	0.769	2886	1		GO:0030162	regulation of proteolysis	0.00808	-3.061	2.689	2.049	209.785	0.838	0.502	30162	0		GO:0002347	response to tumor cell	0.00087	-0.156	0.606	1.079	-170.872	0.966	0.494	2347	0
GO:0010660	regulation of muscle cell apoptosis	0.00094	null	null	1.114	269.692	0.859	0.987	10661	1		GO:0002712	regulation of B cell mediated immunity	0.00202	null	null	1.447	234.538	0.78	0.836	2886	1		GO:0009263	deoxyribonucleotide biosynthetic process	0.00043	-2.539	4.858	0.778	279.651	0.887	0.502	9263	0		GO:0032803	regulation of low-density lipoprotein particle receptor catabolic process	0.00043	-4.379	-4.343	0.778	-179.881	0.829	0.499	32803	0
GO:0030512	negative regulation of transforming growth factor beta receptor signaling pathway	0.00108	0.638	0.715	1.176	813.281	0.771	0.5	30512	0		GO:0022407	regulation of cell-cell adhesion	0.00173	0.081	-0.732	1.38	248.128	0.887	0.491	22407	0		GO:0060216	definitive hemopoiesis	0.00029	7.185	0.845	0.602	219.079	0.807	0.502	60216	0		GO:0040016	embryonic cleavage	0.00022	6.583	1.094	0.477	-136.278	0.865	0.502	40016	0
GO:0017015	regulation of transforming growth factor beta receptor signaling pathway	0.00202	null	null	1.447	461.503	0.791	0.847	30512	1		GO:0000038	very long-chain fatty acid metabolic process	0.00094	2.617	6.001	1.114	253.554	0.885	0.495	38	0		GO:0045598	regulation of fat cell differentiation	0.00152	6.769	-0.569	1.322	271.187	0.809	0.503	45598	0		GO:0045598	regulation of fat cell differentiation	0.00152	6.187	1.092	1.322	-220.502	0.798	0.503	45598	0
GO:0030514	negative regulation of BMP signaling pathway	0.00144	null	null	1.301	649.467	0.768	0.893	30512	1		GO:0045924	regulation of female receptivity	0.00022	-7.153	-0.486	0.477	272.311	0.782	0.496	45924	0		GO:0033151	V(D)J recombination	0.00058	6.157	2.187	0.903	229.739	0.742	0.503	33151	0		GO:0033151	V(D)J recombination	0.00058	6.243	-1.802	0.903	-229.739	0.73	0.503	33151	0
GO:0030510	regulation of BMP signaling pathway	0.0018	null	null	1.398	535.735	0.793	0.807	30512	1		GO:0060180	female mating behavior	0.00022	null	null	0.477	272.311	0.814	0.966	45924	1		GO:0019884	antigen processing and presentation of exogenous antigen	0.00303	3.196	1.982	1.623	256.025	0.913	0.506	19884	0		GO:0002639	positive regulation of immunoglobulin production	0.00029	2.832	-1.914	0.602	-129.725	0.805	0.505	2639	0
GO:0030511	positive regulation of transforming growth factor beta receptor signaling pathway	0.00079	null	null	1.041	331.094	0.751	0.887	30512	1		GO:0007617	mating behavior	0.00051	null	null	0.845	181.541	0.867	0.89	45924	1		GO:0055081	anion homeostasis	0.0013	-0.01	-2.894	1.255	277.609	0.883	0.508	55081	0		GO:0002645	positive regulation of tolerance induction	0.00029	6.394	-0.517	0.602	-130.833	0.689	0.505	2645	0
GO:0001885	endothelial cell development	0.00065	-5.713	-2.764	0.954	1135.23	0.889	0.51	1885	0		GO:0046325	negative regulation of glucose import	0.00058	0.702	-7.892	0.903	341.152	0.817	0.498	46325	0		GO:0008090	retrograde axon cargo transport	0.00022	-2.122	-4.704	0.477	223.978	0.931	0.511	8090	0		GO:0002913	positive regulation of lymphocyte anergy	7e-05	null	null	0	-130.833	0.71	1	2645	1
GO:0045446	endothelial cell differentiation	0.00087	null	null	1.079	851.425	0.889	0.93	1885	1		GO:0010829	negative regulation of glucose transport	0.00072	null	null	1	272.921	0.814	0.829	46325	1		GO:0030307	positive regulation of cell growth	0.00166	0.232	-6.59	1.362	233.759	0.769	0.52	30307	0		GO:0002911	regulation of lymphocyte anergy	7e-05	null	null	0	-130.833	0.734	1	2645	1
GO:0030856	regulation of epithelial cell differentiation	0.00166	null	null	1.362	295.329	0.773	0.764	1885	1		GO:0032094	response to food	0.00318	2.165	-1.608	1.643	228.423	0.88	0.508	32094	0		GO:0045793	positive regulation of cell size	0.00173	null	null	1.38	210.383	0.834	0.712	30307	1		GO:0002664	regulation of T cell tolerance induction	0.00014	null	null	0.301	-130.833	0.724	1	2645	1
GO:0002064	epithelial cell development	0.00238	null	null	1.519	345.29	0.881	0.71	1885	1		GO:0001885	endothelial cell development	0.00065	-5.956	2.557	0.954	979.594	0.904	0.51	1885	0		GO:0048821	erythrocyte development	0.00051	6.823	-0.705	0.845	316.627	0.717	0.521	48821	0		GO:0002666	positive regulation of T cell tolerance induction	0.00014	null	null	0.301	-130.833	0.7	0.959	2645	1
GO:0006638	neutral lipid metabolic process	0.00346	1.077	-2.986	1.681	293.349	0.911	0.514	6638	0		GO:0045446	endothelial cell differentiation	0.00087	null	null	1.079	734.696	0.903	0.93	1885	1		GO:0045648	positive regulation of erythrocyte differentiation	0.00072	null	null	1	201.705	0.66	0.753	48821	1		GO:0002667	regulation of T cell anergy	7e-05	null	null	0	-130.833	0.733	1	2645	1
GO:0030041	actin filament polymerization	0.00289	1.728	2.682	1.602	477.656	0.936	0.515	30041	0		GO:0030856	regulation of epithelial cell differentiation	0.00166	null	null	1.362	260.639	0.78	0.764	1885	1		GO:0006658	phosphatidylserine metabolic process	7e-05	-1.035	0.616	0	641.605	0.922	0.521	6658	0		GO:0002669	positive regulation of T cell anergy	7e-05	null	null	0	-130.833	0.709	0.962	2645	1
GO:0008154	actin polymerization or depolymerization	0.00433	null	null	1.778	286.593	0.936	0.869	30041	1		GO:0002064	epithelial cell development	0.00238	null	null	1.519	293.411	0.897	0.71	1885	1		GO:0043242	negative regulation of protein complex disassembly	0.00173	-1.405	-6.947	1.38	187.998	0.784	0.523	43242	0		GO:0002643	regulation of tolerance induction	0.00029	null	null	0.602	-130.833	0.716	0.95	2645	1
GO:0031122	cytoplasmic microtubule organization	0.00036	1.645	2.555	0.699	441.747	0.948	0.522	31122	0		GO:0006638	neutral lipid metabolic process	0.00346	1.779	3.191	1.681	214.253	0.904	0.514	6638	0		GO:0030835	negative regulation of actin filament depolymerization	0.00072	null	null	1	198.238	0.748	0.986	43242	1		GO:0019884	antigen processing and presentation of exogenous antigen	0.00303	3.634	-1.224	1.623	-231.238	0.907	0.506	19884	0
GO:0016601	Rac protein signal transduction	0.00065	1.074	0.576	0.954	258.977	0.869	0.526	16601	0		GO:0030041	actin filament polymerization	0.00289	1.5	-1.407	1.602	477.656	0.944	0.515	30041	0		GO:0030834	regulation of actin filament depolymerization	0.00079	null	null	1.041	205.316	0.778	0.993	43242	1		GO:0055081	anion homeostasis	0.0013	-0.122	2.452	1.255	-277.609	0.877	0.508	55081	0
GO:0045123	cellular extravasation	0.00072	-0.75	4.371	1	709.081	0.854	0.526	45123	0		GO:0008154	actin polymerization or depolymerization	0.00433	null	null	1.778	286.593	0.945	0.869	30041	1		GO:0043244	regulation of protein complex disassembly	0.00202	null	null	1.447	180.869	0.819	0.941	43242	1		GO:0008090	retrograde axon cargo transport	0.00022	-2.191	4.321	0.477	-223.978	0.917	0.511	8090	0
GO:0009566	fertilization	0.00375	-2.691	-0.504	1.716	413.669	0.945	0.532	9566	0		GO:0031122	cytoplasmic microtubule organization	0.00036	1.611	-1.472	0.699	441.747	0.956	0.522	31122	0		GO:0030837	negative regulation of actin filament polymerization	0.00115	null	null	1.204	176.9	0.744	0.919	43242	1		GO:0010225	response to UV-C	0.00036	0.733	0.92	0.699	-205.679	0.958	0.511	10225	0
GO:0045995	regulation of embryonic development	0.0031	-7.973	-1.646	1.633	312.462	0.786	0.533	45995	0		GO:0016601	Rac protein signal transduction	0.00065	0.294	-1.959	0.954	247.329	0.878	0.526	16601	0		GO:0007026	negative regulation of microtubule depolymerization	0.00087	null	null	1.079	179.57	0.767	0.923	43242	1		GO:0010224	response to UV-B	0.00058	null	null	0.903	-134.683	0.957	0.734	10225	1
GO:0006957	complement activation, alternative pathway	0.00051	1.331	-0.725	0.845	594.92	0.691	0.536	6957	0		GO:0045123	cellular extravasation	0.00072	0.74	-6.779	1	709.081	0.865	0.526	45123	0		GO:0031114	regulation of microtubule depolymerization	0.00087	null	null	1.079	179.57	0.802	0.977	43242	1		GO:0051971	positive regulation of transmission of nerve impulse	0.00072	5.771	-0.749	1	-158.398	0.739	0.517	51971	0
GO:0002455	humoral immune response mediated by circulating immunoglobulin	0.00144	null	null	1.301	321.328	0.816	0.796	6957	1		GO:0030317	sperm motility	0.00094	1.638	-6.466	1.114	223.554	0.91	0.528	30317	0		GO:0051693	actin filament capping	0.00072	null	null	1	198.238	0.745	0.911	43242	1		GO:0031646	positive regulation of neurological system process	0.00079	null	null	1.041	-158.398	0.764	0.713	51971	1
GO:0006958	complement activation, classical pathway	0.00101	null	null	1.146	321.328	0.688	0.924	6957	1		GO:0009566	fertilization	0.00375	-3.228	-0.355	1.716	360.494	0.932	0.532	9566	0		GO:0001675	acrosome assembly	0.00058	5.598	-4.673	0.903	261.529	0.772	0.523	1675	0		GO:0046621	negative regulation of organ growth	0.00036	0.417	-0.491	0.699	-184.909	0.868	0.52	46621	0
GO:0006956	complement activation	0.00245	null	null	1.531	292.116	0.679	0.896	6957	1		GO:0045995	regulation of embryonic development	0.0031	-8.15	1.357	1.633	210.067	0.794	0.533	45995	0		GO:0042053	regulation of dopamine metabolic process	0.00058	-3.639	5.813	0.903	186.91	0.822	0.524	42053	0		GO:0006658	phosphatidylserine metabolic process	7e-05	-1.333	-1.159	0	-641.605	0.925	0.521	6658	0
GO:0006749	glutathione metabolic process	0.00188	2.104	-5.954	1.415	412.782	0.917	0.538	6749	0		GO:0006749	glutathione metabolic process	0.00188	2.619	6.363	1.415	366.494	0.898	0.538	6749	0		GO:0042069	regulation of catecholamine metabolic process	0.00058	null	null	0.903	186.91	0.822	0.969	42053	1		GO:0051155	positive regulation of striated muscle cell differentiation	0.00022	5.613	-0.188	0.477	-165.571	0.78	0.523	51155	0
GO:0030865	cortical cytoskeleton organization	0.00058	2.191	2.895	0.903	459.413	0.947	0.541	30865	0		GO:0006465	signal peptide processing	0.00065	null	null	0.954	250.076	0.934	0.823	6749	1		GO:0010224	response to UV-B	0.00058	0.761	-0.766	0.903	443.652	0.946	0.526	10224	0		GO:0051149	positive regulation of muscle cell differentiation	0.00043	null	null	0.778	-149.607	0.771	0.807	51155	1
GO:0002437	inflammatory response to antigenic stimulus	0.00137	-1.863	1.641	1.279	739.778	0.817	0.552	2437	0		GO:0030865	cortical cytoskeleton organization	0.00058	2.167	-2.147	0.903	459.413	0.955	0.541	30865	0		GO:0010225	response to UV-C	0.00036	null	null	0.699	205.679	0.948	0.734	10224	1		GO:0001675	acrosome assembly	0.00058	4.687	5.427	0.903	-261.529	0.779	0.523	1675	0
GO:0043392	negative regulation of DNA binding	0.00058	1.109	-2.969	0.903	346.154	0.901	0.555	43392	0		GO:0051443	positive regulation of ubiquitin-protein ligase activity	0.00058	2.198	3.841	0.903	184.587	0.791	0.546	51443	0		GO:0019882	antigen processing and presentation	0.06358	3.315	2.054	2.945	348.312	0.893	0.53	19882	0		GO:0019882	antigen processing and presentation	0.06358	3.76	-1.277	2.945	-293.3	0.887	0.53	19882	0
GO:0051100	negative regulation of binding	0.00144	null	null	1.301	275.926	0.895	0.784	43392	1		GO:0051351	positive regulation of ligase activity	0.00072	null	null	1	184.587	0.87	0.959	51443	1		GO:0002320	lymphoid progenitor cell differentiation	0.00072	7.635	0.816	1	267.111	0.786	0.534	2320	0		GO:0017004	cytochrome complex assembly	0.00022	-1.352	6.78	0.477	-143.989	0.904	0.532	17004	0
GO:0043403	skeletal muscle tissue regeneration	0.00065	-4.928	-1.987	0.954	1134.76	0.79	0.556	43403	0		GO:0051044	positive regulation of membrane protein ectodomain proteolysis	0.00094	2.331	3.425	1.114	211.68	0.792	0.552	51044	0		GO:0016557	peroxisome membrane biogenesis	0.00014	-0.601	-7.062	0.301	201.192	0.902	0.537	16557	0		GO:0007193	inhibition of adenylate cyclase activity by G-protein signaling pathway	0.00108	-2.858	-5.926	1.176	-185.603	0.755	0.532	7193	0
GO:0042246	tissue regeneration	0.00094	null	null	1.114	680.859	0.785	0.936	43403	1		GO:0043403	skeletal muscle tissue regeneration	0.00065	-5.329	2.153	0.954	980.063	0.817	0.556	43403	0		GO:0055062	phosphate ion homeostasis	0.00051	0.006	-2.812	0.845	278.312	0.888	0.538	55062	0		GO:0030810	positive regulation of nucleotide biosynthetic process	0.00166	null	null	1.362	-145.123	0.747	0.998	7193	1
GO:0008286	insulin receptor signaling pathway	0.0031	1.17	5.16	1.633	301.436	0.82	0.561	8286	0		GO:0042246	tissue regeneration	0.00094	null	null	1.114	588.038	0.813	0.936	43403	1		GO:0030002	cellular anion homeostasis	0.00108	null	null	1.176	263.111	0.877	0.921	55062	1		GO:0030816	positive regulation of cAMP metabolic process	0.00137	null	null	1.279	-129.249	0.756	0.984	7193	1
GO:0034637	cellular carbohydrate biosynthetic process	0.00599	1.947	-4.788	1.919	334.202	0.904	0.572	34637	0		GO:0045026	plasma membrane fusion	0.00051	2.301	-2.617	0.845	191.356	0.952	0.558	45026	0		GO:0045861	negative regulation of proteolysis	0.00245	-4.066	3.539	1.531	196.653	0.8	0.543	45861	0		GO:0030819	positive regulation of cAMP biosynthetic process	0.00137	null	null	1.279	-129.249	0.748	0.984	7193	1
GO:0007271	synaptic transmission, cholinergic	0.00058	-6.368	0.275	0.903	257.862	0.874	0.575	7271	0		GO:0008286	insulin receptor signaling pathway	0.0031	1.859	-2.709	1.633	219.186	0.836	0.561	8286	0		GO:0045332	phospholipid translocation	0.00022	-1.444	-7.398	0.477	227.851	0.801	0.549	45332	0		GO:0030828	positive regulation of cGMP biosynthetic process	0.00036	null	null	0.699	-179.881	0.768	0.721	7193	1
GO:0048147	negative regulation of fibroblast proliferation	0.00065	-1.118	-0.72	0.954	302.716	0.869	0.576	48147	0		GO:0007530	sex determination	0.00094	-5.592	1.554	1.114	247.528	0.889	0.563	7530	0		GO:0034204	lipid translocation	0.00022	null	null	0.477	227.851	0.802	1	45332	1		GO:0030825	positive regulation of cGMP metabolic process	0.00036	null	null	0.699	-179.881	0.775	0.912	7193	1
GO:0042744	hydrogen peroxide catabolic process	0.00094	2.112	2.483	1.114	372.047	0.81	0.577	42744	0		GO:0006957	complement activation, alternative pathway	0.00051	-0.02	-1.022	0.845	594.92	0.735	0.566	6957	0		GO:0033700	phospholipid efflux	0.00072	null	null	1	205.321	0.926	0.816	45332	1		GO:0030801	positive regulation of cyclic nucleotide metabolic process	0.00166	null	null	1.362	-145.123	0.754	0.998	7193	1
GO:0043619	regulation of transcription from RNA polymerase II promoter in response to oxidative stress	0.00036	null	null	0.699	297.189	0.764	0.732	42744	1		GO:0034637	cellular carbohydrate biosynthetic process	0.00599	1.881	3.973	1.919	206.688	0.897	0.572	34637	0		GO:0043586	tongue development	0.00072	7.972	-0.277	1	316.202	0.851	0.555	43586	0		GO:0030804	positive regulation of cyclic nucleotide biosynthetic process	0.00166	null	null	1.362	-145.123	0.746	0.892	7193	1
GO:0043618	regulation of transcription from RNA polymerase II promoter in response to stress	0.00036	null	null	0.699	297.189	0.79	1	42744	1		GO:0032881	regulation of polysaccharide metabolic process	0.00065	null	null	0.954	224.404	0.856	0.775	34637	1		GO:0007193	inhibition of adenylate cyclase activity by G-protein signaling pathway	0.00108	-3.398	5.491	1.176	185.603	0.764	0.557	7193	0		GO:0031280	negative regulation of cyclase activity	0.00108	null	null	1.176	-185.603	0.863	0.847	7193	1
GO:0070301	cellular response to hydrogen peroxide	0.00123	null	null	1.23	372.047	0.847	0.935	42744	1		GO:0032885	regulation of polysaccharide biosynthetic process	0.00065	null	null	0.954	224.404	0.837	0.999	34637	1		GO:0030823	regulation of cGMP metabolic process	0.00072	null	null	1	180.651	0.825	0.742	7193	1		GO:0006171	cAMP biosynthetic process	0.00491	null	null	1.833	-134.627	0.853	0.855	7193	1
GO:0034614	cellular response to reactive oxygen species	0.00238	null	null	1.519	257.494	0.841	0.885	42744	1		GO:0010962	regulation of glucan biosynthetic process	0.00065	null	null	0.954	224.404	0.827	0.999	34637	1		GO:0030828	positive regulation of cGMP biosynthetic process	0.00036	null	null	0.699	179.881	0.788	0.808	7193	1		GO:0051350	negative regulation of lyase activity	0.00108	null	null	1.176	-185.603	0.863	0.84	7193	1
GO:0002544	chronic inflammatory response	0.00072	0.594	-0.024	1	651.968	0.865	0.58	2544	0		GO:0005979	regulation of glycogen biosynthetic process	0.00065	null	null	0.954	224.404	0.799	0.991	34637	1		GO:0030825	positive regulation of cGMP metabolic process	0.00036	null	null	0.699	179.881	0.801	0.912	7193	1		GO:0007194	negative regulation of adenylate cyclase activity	0.00108	null	null	1.176	-185.603	0.775	0.999	7193	1
GO:0001892	embryonic placenta development	0.00318	-7.763	-1.685	1.643	254.913	0.857	0.58	1892	0		GO:0045725	positive regulation of glycogen biosynthetic process	0.00058	null	null	0.903	224.404	0.748	0.757	34637	1		GO:0031280	negative regulation of cyclase activity	0.00108	null	null	1.176	185.603	0.875	0.847	7193	1		GO:0002320	lymphoid progenitor cell differentiation	0.00072	7.704	0.177	1	-267.111	0.777	0.534	2320	0
GO:0001541	ovarian follicle development	0.00224	-7.362	-1.292	1.491	291.297	0.831	0.581	1541	0		GO:0002544	chronic inflammatory response	0.00072	0.664	0.632	1	397.516	0.888	0.575	2544	0		GO:0051350	negative regulation of lyase activity	0.00108	null	null	1.176	185.603	0.875	0.84	7193	1		GO:0016557	peroxisome membrane biogenesis	0.00014	-1.594	6.998	0.301	-201.192	0.908	0.537	16557	0
GO:0008306	associative learning	0.00224	-6.986	-0.277	1.491	306.596	0.844	0.581	8306	0		GO:0007271	synaptic transmission, cholinergic	0.00058	-6.763	-0.716	0.903	257.862	0.867	0.575	7271	0		GO:0007194	negative regulation of adenylate cyclase activity	0.00108	null	null	1.176	185.603	0.79	0.999	7193	1		GO:0055062	phosphate ion homeostasis	0.00051	-0.102	2.411	0.845	-278.312	0.882	0.538	55062	0
GO:0009895	negative regulation of catabolic process	0.00354	1.597	-4.002	1.69	531.798	0.82	0.585	9895	0		GO:0048048	embryonic eye morphogenesis	0.00072	-8.472	1.761	1	196.859	0.866	0.576	48048	0		GO:0002244	hemopoietic progenitor cell differentiation	0.00123	7.427	0.721	1.23	213.343	0.778	0.558	2244	0		GO:0030002	cellular anion homeostasis	0.00108	null	null	1.176	-263.111	0.871	0.921	55062	1
GO:0007259	JAK-STAT cascade	0.00346	1.675	0.879	1.681	314.521	0.853	0.59	7259	0		GO:0048147	negative regulation of fibroblast proliferation	0.00065	-1.948	-1.761	0.954	230.285	0.88	0.576	48147	0		GO:0022038	corpus callosum development	0.00022	7.711	-0.432	0.477	223.978	0.852	0.56	22038	0		GO:0045039	protein import into mitochondrial inner membrane	0.00043	-2.418	7.204	0.778	-207.055	0.838	0.545	45039	0
GO:0042742	defense response to bacterium	0.00917	-0.304	1.215	2.104	528.792	0.807	0.592	42742	0		GO:0042744	hydrogen peroxide catabolic process	0.00094	2.584	-0.495	1.114	353.679	0.826	0.577	42744	0		GO:0006482	protein demethylation	0.00065	-3.286	3.459	0.954	252.421	0.893	0.563	6482	0		GO:0045046	protein import into peroxisome membrane	0.00029	null	null	0.602	-201.192	0.852	0.789	45039	1
GO:0009617	response to bacterium	0.01494	null	null	2.316	398.27	0.87	0.816	42742	1		GO:0042542	response to hydrogen peroxide	0.00166	null	null	1.362	177.083	0.879	0.926	42744	1		GO:0016073	snRNA metabolic process	0.00058	-1.429	3.574	0.903	419.707	0.918	0.565	16073	0		GO:0007007	inner mitochondrial membrane organization	0.00051	null	null	0.845	-172.546	0.895	0.812	45039	1
GO:0006110	regulation of glycolysis	0.00079	2.957	-6.541	1.041	264	0.801	0.594	6110	0		GO:0043619	regulation of transcription from RNA polymerase II promoter in response to oxidative stress	0.00036	null	null	0.699	297.189	0.773	0.732	42744	1		GO:0002051	osteoblast fate commitment	0.00014	6.856	-0.56	0.301	287.794	0.861	0.57	2051	0		GO:0045332	phospholipid translocation	0.00022	-2.212	6.961	0.477	-227.851	0.781	0.549	45332	0
GO:0045821	positive regulation of glycolysis	0.00051	null	null	0.845	264	0.746	0.969	6110	1		GO:0043618	regulation of transcription from RNA polymerase II promoter in response to stress	0.00036	null	null	0.699	297.189	0.798	1	42744	1		GO:0002711	positive regulation of T cell mediated immunity	0.00173	3.025	2.102	1.38	260.169	0.751	0.574	2711	0		GO:0034204	lipid translocation	0.00022	null	null	0.477	-227.851	0.783	1	45332	1
GO:0043471	regulation of cellular carbohydrate catabolic process	0.00079	null	null	1.041	264	0.823	0.999	6110	1		GO:0070301	cellular response to hydrogen peroxide	0.00123	null	null	1.23	353.679	0.864	0.935	42744	1		GO:0002460	adaptive immune response based on somatic recombination of immune receptors built from immunoglobulin superfamily domains	0.00801	null	null	2.045	205.762	0.863	0.94	2711	1		GO:0033700	phospholipid efflux	0.00072	null	null	1	-205.321	0.91	0.816	45332	1
GO:0043470	regulation of carbohydrate catabolic process	0.00079	null	null	1.041	264	0.836	0.803	6110	1		GO:0042743	hydrogen peroxide metabolic process	0.00159	null	null	1.342	198.358	0.957	0.829	42744	1		GO:0001910	regulation of leukocyte mediated cytotoxicity	0.00195	null	null	1.431	179.086	0.831	0.961	2711	1		GO:0048597	post-embryonic camera-type eye morphogenesis	0.00029	7.808	1.335	0.602	-297.873	0.839	0.555	48597	0
GO:0043542	endothelial cell migration	0.00346	1.14	4.844	1.681	472.367	0.912	0.595	43542	0		GO:0034614	cellular response to reactive oxygen species	0.00238	null	null	1.519	181.392	0.858	0.885	42744	1		GO:0001912	positive regulation of leukocyte mediated cytotoxicity	0.00195	null	null	1.431	179.086	0.8	0.808	2711	1		GO:0048050	post-embryonic eye morphogenesis	0.00029	null	null	0.602	-297.873	0.839	0.972	48597	1
GO:0051291	protein heterooligomerization	0.00087	2.348	2.918	1.079	332.787	0.957	0.602	51291	0		GO:0006379	mRNA cleavage	0.00072	2.621	5.255	1	410.141	0.93	0.581	6379	0		GO:0002449	lymphocyte mediated immunity	0.00808	null	null	2.049	218.669	0.891	0.833	2711	1		GO:0048563	post-embryonic organ morphogenesis	0.00036	null	null	0.699	-198.582	0.839	0.944	48597	1
GO:0051044	positive regulation of membrane protein ectodomain proteolysis	0.00094	3.581	-4.361	1.114	355.585	0.776	0.602	51044	0		GO:0006309	DNA fragmentation involved in apoptotic nuclear change	0.00101	null	null	1.146	286.545	0.862	0.844	6379	1		GO:0002443	leukocyte mediated immunity	0.00909	null	null	2.1	209.859	0.893	0.835	2711	1		GO:0031077	post-embryonic camera-type eye development	0.00036	null	null	0.699	-198.582	0.841	0.957	48597	1
GO:0007603	phototransduction, visible light	0.00029	1.201	1.508	0.602	333.209	0.824	0.612	7603	0		GO:0030262	apoptotic nuclear change	0.00123	null	null	1.23	257.89	0.924	0.968	6379	1		GO:0016064	immunoglobulin mediated immune response	0.00491	null	null	1.833	229.81	0.858	0.919	2711	1		GO:0042267	natural killer cell mediated cytotoxicity	0.00159	2.841	-2.84	1.342	-135.15	0.774	0.558	42267	0
GO:0050908	detection of light stimulus involved in visual perception	0.00043	null	null	0.778	289.16	0.803	0.955	7603	1		GO:0010460	positive regulation of heart rate	0.00072	-6.577	-0.064	1	212.183	0.762	0.581	10460	0		GO:0019724	B cell mediated immunity	0.00505	null	null	1.845	221.298	0.858	0.943	2711	1		GO:0002228	natural killer cell mediated immunity	0.00159	null	null	1.342	-135.15	0.875	0.741	42267	1
GO:0009584	detection of visible light	0.00051	null	null	0.845	273.633	0.879	0.839	7603	1		GO:0045823	positive regulation of heart contraction	0.00094	null	null	1.114	228.093	0.765	0.807	10460	1		GO:0002823	negative regulation of adaptive immune response based on somatic recombination of immune receptors built from immunoglobulin superfamily domains	0.00029	null	null	0.602	196.87	0.778	0.738	2711	1		GO:0030853	negative regulation of granulocyte differentiation	0.00036	6.767	-0.5	0.699	-263.943	0.674	0.559	30853	0
GO:0050962	detection of light stimulus involved in sensory perception	0.00043	null	null	0.778	289.16	0.804	0.81	7603	1		GO:0002027	regulation of heart rate	0.00137	null	null	1.279	184.74	0.802	0.846	10460	1		GO:0002820	negative regulation of adaptive immune response	0.00029	null	null	0.602	196.87	0.778	0.801	2711	1		GO:0030852	regulation of granulocyte differentiation	0.00043	null	null	0.778	-263.943	0.703	0.988	30853	1
GO:0048875	chemical homeostasis within a tissue	0.00014	-6.175	-0.221	0.301	861.262	0.867	0.613	48875	0		GO:0007259	JAK-STAT cascade	0.00346	0.378	-2.952	1.681	279.243	0.861	0.59	7259	0		GO:0002709	regulation of T cell mediated immunity	0.00188	null	null	1.415	262.68	0.776	0.94	2711	1		GO:0045655	regulation of monocyte differentiation	0.00043	null	null	0.778	-263.943	0.705	0.735	30853	1
GO:0010332	response to gamma radiation	0.00115	0.086	-0.232	1.204	538.818	0.929	0.617	10332	0		GO:0042742	defense response to bacterium	0.00917	0.407	-0.252	2.104	307.838	0.838	0.592	42742	0		GO:0002639	positive regulation of immunoglobulin production	0.00029	null	null	0.602	176.594	0.824	0.701	2711	1		GO:0002762	negative regulation of myeloid leukocyte differentiation	0.00108	null	null	1.176	-126.22	0.653	0.849	30853	1
GO:0008629	induction of apoptosis by intracellular signals	0.00195	3.46	-1.593	1.431	298.807	0.795	0.629	8629	0		GO:0009617	response to bacterium	0.01494	null	null	2.316	208.779	0.895	0.816	42742	1		GO:0045736	negative regulation of cyclin-dependent protein kinase activity	0.00101	-2.979	1.795	1.146	180.625	0.795	0.577	45736	0		GO:0022038	corpus callosum development	0.00022	7.514	1.27	0.477	-223.978	0.841	0.56	22038	0
GO:0002740	negative regulation of cytokine secretion involved in immune response	0.00036	-4.891	2.357	0.699	505.427	0.616	0.629	2740	0		GO:0006685	sphingomyelin catabolic process	0.00029	2.736	3.642	0.602	223.929	0.9	0.594	6685	0		GO:0002274	myeloid leukocyte activation	0.00375	3.127	1.813	1.716	179.739	0.891	0.579	2274	0		GO:0009612	response to mechanical stimulus	0.00152	0.93	0.427	1.322	-216.638	0.909	0.562	9612	0
GO:0050709	negative regulation of protein secretion	0.00123	null	null	1.23	313.19	0.795	0.784	2740	1		GO:0043542	endothelial cell migration	0.00346	1.603	-6.919	1.681	472.367	0.901	0.595	43542	0		GO:0042987	amyloid precursor protein catabolic process	0.00029	-1.461	1.583	0.602	458.597	0.909	0.579	42987	0		GO:0006482	protein demethylation	0.00065	-3.523	-2.71	0.954	-252.421	0.889	0.563	6482	0
GO:0050710	negative regulation of cytokine secretion	0.00065	null	null	0.954	404.342	0.727	0.877	2740	1		GO:0051291	protein heterooligomerization	0.00087	2.558	-2.549	1.079	332.787	0.963	0.602	51291	0		GO:0009612	response to mechanical stimulus	0.00152	0.659	-0.057	1.322	216.638	0.89	0.581	9612	0		GO:0033138	positive regulation of peptidyl-serine phosphorylation	0.00159	-2.735	-3.068	1.342	-119.338	0.78	0.564	33138	0
GO:0050714	positive regulation of protein secretion	0.00289	null	null	1.602	271.307	0.748	0.872	2740	1		GO:0002437	inflammatory response to antigenic stimulus	0.00137	-1.072	-3.495	1.279	678.384	0.853	0.603	2437	0		GO:0046100	hypoxanthine metabolic process	0.00022	-2.448	4.333	0.477	181.21	0.904	0.581	46100	0		GO:0016073	snRNA metabolic process	0.00058	-1.678	-3.915	0.903	-419.707	0.911	0.565	16073	0
GO:0002718	regulation of cytokine production involved in immune response	0.0018	null	null	1.398	336.951	0.657	0.846	2740	1		GO:0050777	negative regulation of immune response	0.00144	-1.495	-4.569	1.301	292.337	0.782	0.611	50777	0		GO:0034227	tRNA thio-modification	0.00029	-2.11	2.627	0.602	315.924	0.906	0.582	34227	0		GO:0032365	intracellular lipid transport	0.00036	-2.599	4.633	0.699	-138.4	0.897	0.566	32365	0
GO:0002739	regulation of cytokine secretion involved in immune response	0.00036	null	null	0.699	505.427	0.625	1	2740	1		GO:0007603	phototransduction, visible light	0.00029	0.795	-1.96	0.602	333.209	0.843	0.612	7603	0		GO:0006400	tRNA modification	0.00137	null	null	1.279	279.315	0.899	0.769	34227	1		GO:0006772	thiamine metabolic process	0.00014	-2.484	-4.178	0.301	-134.627	0.895	0.567	6772	0
GO:0051023	regulation of immunoglobulin secretion	0.00101	null	null	1.146	269.457	0.712	0.861	2740	1		GO:0050908	detection of light stimulus involved in visual perception	0.00043	null	null	0.778	289.16	0.815	0.955	7603	1		GO:0002098	tRNA wobble uridine modification	0.00036	null	null	0.699	315.924	0.905	0.819	34227	1		GO:0042723	thiamine-containing compound metabolic process	0.00014	null	null	0.301	-134.627	0.895	0.709	6772	1
GO:0051384	response to glucocorticoid stimulus	0.00123	0.63	6.02	1.23	273.5	0.908	0.63	51384	0		GO:0009584	detection of visible light	0.00051	null	null	0.845	273.633	0.9	0.839	7603	1		GO:0002097	tRNA wobble base modification	0.00036	null	null	0.699	315.924	0.905	0.83	34227	1		GO:0002051	osteoblast fate commitment	0.00014	6.802	1.157	0.301	-287.794	0.858	0.57	2051	0
GO:0032319	regulation of Rho GTPase activity	0.00166	3.849	-5.351	1.362	348.335	0.698	0.63	32319	0		GO:0050962	detection of light stimulus involved in sensory perception	0.00043	null	null	0.778	289.16	0.815	0.81	7603	1		GO:0002326	B cell lineage commitment	0.00022	7.573	0.928	0.477	183.559	0.784	0.584	2326	0		GO:0043984	histone H4-K16 acetylation	0.00022	-2.696	5.779	0.477	-139.02	0.857	0.576	43984	0
GO:0046486	glycerolipid metabolic process	0.0096	1.192	-3.256	2.124	257.127	0.904	0.631	46486	0		GO:0048875	chemical homeostasis within a tissue	0.00014	-6.296	0.181	0.301	861.262	0.868	0.613	48875	0		GO:0043277	apoptotic cell clearance	0.00072	-1.495	-7.111	1	175.308	0.868	0.586	43277	0		GO:0034227	tRNA thio-modification	0.00029	-2.668	-2.585	0.602	-315.924	0.898	0.582	34227	0
GO:0032101	regulation of response to external stimulus	0.01436	1.226	1.172	2.299	283.917	0.767	0.633	32101	0		GO:0010332	response to gamma radiation	0.00115	0.091	0.109	1.204	256.075	0.938	0.617	10332	0		GO:0021940	positive regulation of cerebellar granule cell precursor proliferation	0.00051	6.941	-0.644	0.845	252.273	0.744	0.592	21940	0		GO:0006400	tRNA modification	0.00137	null	null	1.279	-215.877	0.889	0.769	34227	1
GO:0030866	cortical actin cytoskeleton organization	0.00058	2.199	2.91	0.903	459.413	0.946	0.638	30866	0		GO:0002740	negative regulation of cytokine secretion involved in immune response	0.00036	-4.65	-5.176	0.699	203.654	0.647	0.629	2740	0		GO:0007405	neuroblast proliferation	0.00144	null	null	1.301	232.35	0.822	0.84	21940	1		GO:0002098	tRNA wobble uridine modification	0.00036	null	null	0.699	-315.924	0.896	0.819	34227	1
GO:0048149	behavioral response to ethanol	0.00036	-5.496	3.218	0.699	317.14	0.844	0.639	48149	0		GO:0002739	regulation of cytokine secretion involved in immune response	0.00036	null	null	0.699	203.654	0.656	1	2740	1		GO:0021936	regulation of cerebellar granule cell precursor proliferation	0.00051	null	null	0.845	252.273	0.769	0.999	21940	1		GO:0002097	tRNA wobble base modification	0.00036	null	null	0.699	-315.924	0.896	0.83	34227	1
GO:0016051	carbohydrate biosynthetic process	0.00823	2.579	-6.162	2.057	292.197	0.916	0.64	16051	0		GO:0051384	response to glucocorticoid stimulus	0.00123	2.132	-1.241	1.23	199.221	0.92	0.63	51384	0		GO:0010544	negative regulation of platelet activation	0.00065	5.127	0.139	0.954	179.881	0.672	0.593	10544	0		GO:0002326	B cell lineage commitment	0.00022	7.651	0.009	0.477	-183.559	0.767	0.584	2326	0
GO:0060349	bone morphogenesis	0.00217	-7.258	-1.686	1.477	355.966	0.85	0.644	60349	0		GO:0016540	protein autoprocessing	0.00029	1.993	3.482	0.602	211.59	0.95	0.637	16540	0		GO:0030889	negative regulation of B cell proliferation	0.00036	null	null	0.699	175.962	0.793	0.742	10544	1		GO:0043409	negative regulation of MAPKKK cascade	0.0026	0.338	-2.521	1.556	-184.909	0.784	0.587	43409	0
GO:0001958	endochondral ossification	0.00079	null	null	1.041	355.966	0.858	0.864	60349	1		GO:0030866	cortical actin cytoskeleton organization	0.00058	2.181	-2.157	0.903	459.413	0.954	0.638	30866	0		GO:0030853	negative regulation of granulocyte differentiation	0.00036	6.646	1.01	0.699	263.943	0.695	0.598	30853	0		GO:0043506	regulation of JUN kinase activity	0.00137	null	null	1.279	-139.423	0.755	0.716	43409	1
GO:0001502	cartilage condensation	0.00152	null	null	1.322	278.019	0.817	0.782	60349	1		GO:0046037	GMP metabolic process	0.00051	2.566	6.163	0.845	202.658	0.918	0.644	46037	0		GO:0030852	regulation of granulocyte differentiation	0.00043	null	null	0.778	263.943	0.72	0.988	30853	1		GO:0006422	aspartyl-tRNA aminoacylation	0.00036	-3.266	-4.579	0.699	-148.072	0.859	0.59	6422	0
GO:0060350	endochondral bone morphogenesis	0.00137	null	null	1.279	355.966	0.855	0.901	60349	1		GO:0060349	bone morphogenesis	0.00217	-7.488	1.533	1.477	275.282	0.852	0.644	60349	0		GO:0045655	regulation of monocyte differentiation	0.00043	null	null	0.778	263.943	0.721	0.735	30853	1		GO:0042474	middle ear morphogenesis	0.00072	7.063	1.145	1	-152.787	0.838	0.59	42474	0
GO:0032715	negative regulation of interleukin-6 production	0.00159	-6.099	-0.676	1.342	409.403	0.792	0.648	32715	0		GO:0001958	endochondral ossification	0.00079	null	null	1.041	275.282	0.859	0.864	60349	1		GO:0048002	antigen processing and presentation of peptide antigen	0.01465	3.485	2.153	2.307	591.928	0.901	0.598	48002	0		GO:0021940	positive regulation of cerebellar granule cell precursor proliferation	0.00051	6.503	-0.021	0.845	-252.273	0.711	0.592	21940	0
GO:0032691	negative regulation of interleukin-1 beta production	0.00137	null	null	1.279	257.862	0.793	0.773	32715	1		GO:0001502	cartilage condensation	0.00152	null	null	1.322	269.254	0.817	0.782	60349	1		GO:0008343	adult feeding behavior	0.0018	6.093	-0.204	1.398	405.353	0.848	0.602	8343	0		GO:0021936	regulation of cerebellar granule cell precursor proliferation	0.00051	null	null	0.845	-252.273	0.741	0.999	21940	1
GO:0032692	negative regulation of interleukin-1 production	0.00137	null	null	1.279	257.862	0.793	0.905	32715	1		GO:0060350	endochondral bone morphogenesis	0.00137	null	null	1.279	275.282	0.856	0.901	60349	1		GO:0006612	protein targeting to membrane	0.00188	-2.181	-4.844	1.415	190.953	0.918	0.602	6612	0		GO:0010544	negative regulation of platelet activation	0.00065	5.33	0.133	0.954	-179.881	0.635	0.593	10544	0
GO:0045761	regulation of adenylate cyclase activity	0.00281	2.798	-6.888	1.591	256.354	0.804	0.649	45761	0		GO:0032715	negative regulation of interleukin-6 production	0.00159	-6.511	-0.592	1.342	409.403	0.798	0.648	32715	0		GO:0035234	germ cell programmed cell death	0.00043	6.075	-2.99	0.778	183.953	0.783	0.602	35234	0		GO:0051250	negative regulation of lymphocyte activation	0.00267	null	null	1.568	-132.599	0.726	0.973	10544	1
GO:0007190	activation of adenylate cyclase activity	0.00152	null	null	1.322	274.233	0.81	0.935	45761	1		GO:0032691	negative regulation of interleukin-1 beta production	0.00137	null	null	1.279	257.862	0.799	0.773	32715	1		GO:0046668	regulation of retinal cell programmed cell death	0.00029	null	null	0.602	181.774	0.763	0.85	35234	1		GO:0050869	negative regulation of B cell activation	0.00072	null	null	1	-131.971	0.747	0.836	10544	1
GO:0045762	positive regulation of adenylate cyclase activity	0.00166	null	null	1.362	274.233	0.809	0.985	45761	1		GO:0032692	negative regulation of interleukin-1 production	0.00137	null	null	1.279	257.862	0.799	0.905	32715	1		GO:0045039	protein import into mitochondrial inner membrane	0.00043	-1.595	-7.533	0.778	314.973	0.838	0.604	45039	0		GO:0050868	negative regulation of T cell activation	0.00209	null	null	1.462	-134.236	0.728	0.93	10544	1
GO:0042093	T-helper cell differentiation	0.00087	-7.593	-0.645	1.079	429.495	0.725	0.649	42093	0		GO:0032720	negative regulation of tumor necrosis factor production	0.00195	null	null	1.431	244.473	0.795	0.794	32715	1		GO:0045046	protein import into peroxisome membrane	0.00029	null	null	0.602	201.192	0.853	0.789	45039	1		GO:0042130	negative regulation of T cell proliferation	0.00101	null	null	1.146	-121.207	0.729	0.972	10544	1
GO:0002293	alpha-beta T cell differentiation involved in immune response	0.00094	null	null	1.114	429.495	0.724	0.993	42093	1		GO:0042093	T-helper cell differentiation	0.00087	-7.824	-0.135	1.079	188.443	0.766	0.649	42093	0		GO:0007007	inner mitochondrial membrane organization	0.00051	null	null	0.845	262.478	0.887	0.812	45039	1		GO:0032945	negative regulation of mononuclear cell proliferation	0.00144	null	null	1.301	-138.27	0.831	0.999	10544	1
GO:0002294	CD4-positive, alpha-beta T cell differentiation involved in immune response	0.00087	null	null	1.079	429.495	0.725	0.988	42093	1		GO:0002293	alpha-beta T cell differentiation involved in immune response	0.00094	null	null	1.114	188.443	0.764	0.993	42093	1		GO:0006268	DNA unwinding involved in replication	0.00051	-1.297	4.529	0.845	270.369	0.901	0.605	6268	0		GO:0010543	regulation of platelet activation	0.00101	null	null	1.146	-145.339	0.657	0.842	10544	1
GO:0002292	T cell differentiation involved in immune response	0.00094	null	null	1.114	429.495	0.726	0.899	42093	1		GO:0002294	CD4-positive, alpha-beta T cell differentiation involved in immune response	0.00087	null	null	1.079	188.443	0.766	0.988	42093	1		GO:0006270	DNA-dependent DNA replication initiation	0.00152	null	null	1.322	185.188	0.904	0.796	6268	1		GO:0030889	negative regulation of B cell proliferation	0.00036	null	null	0.699	-175.962	0.747	0.742	10544	1
GO:0002286	T cell activation involved in immune response	0.00188	null	null	1.415	290.94	0.818	0.829	42093	1		GO:0002292	T cell differentiation involved in immune response	0.00094	null	null	1.114	188.443	0.765	0.899	42093	1		GO:0032508	DNA duplex unwinding	0.00087	null	null	1.079	225.307	0.973	0.962	6268	1		GO:0050672	negative regulation of lymphocyte proliferation	0.00144	null	null	1.301	-138.27	0.725	0.903	10544	1
GO:0002287	alpha-beta T cell activation involved in immune response	0.00094	null	null	1.114	429.495	0.823	0.894	42093	1		GO:0002287	alpha-beta T cell activation involved in immune response	0.00094	null	null	1.114	188.443	0.866	0.894	42093	1		GO:0032105	negative regulation of response to extracellular stimulus	0.00101	-0.314	0.756	1.146	414.641	0.775	0.612	32105	0		GO:0002695	negative regulation of leukocyte activation	0.00274	null	null	1.58	-124.312	0.727	0.939	10544	1
GO:0043367	CD4-positive, alpha-beta T cell differentiation	0.0013	null	null	1.255	324.038	0.784	0.969	42093	1		GO:0032890	regulation of organic acid transport	0.00051	1.643	-7.282	0.845	191.785	0.835	0.65	32890	0		GO:0032109	positive regulation of response to nutrient levels	0.0013	null	null	1.255	251.284	0.773	0.994	32105	1		GO:0045581	negative regulation of T cell differentiation	0.00101	null	null	1.146	-168.812	0.636	0.797	10544	1
GO:0001659	temperature homeostasis	0.00152	-6.372	-0.192	1.322	545.05	0.846	0.656	1659	0		GO:0040018	positive regulation of multicellular organism growth	0.00498	-6.273	0.426	1.839	180.759	0.753	0.656	40018	0		GO:0032106	positive regulation of response to extracellular stimulus	0.0013	null	null	1.255	251.284	0.774	0.953	32105	1		GO:0045620	negative regulation of lymphocyte differentiation	0.00108	null	null	1.176	-168.812	0.636	0.861	10544	1
GO:0050805	negative regulation of synaptic transmission	0.00022	-6.109	-0.203	0.477	272.311	0.788	0.656	50805	0		GO:0001659	temperature homeostasis	0.00152	-6.414	0.206	1.322	503.781	0.848	0.656	1659	0		GO:0032107	regulation of response to nutrient levels	0.00231	null	null	1.505	341.961	0.794	0.934	32105	1		GO:0006898	receptor-mediated endocytosis	0.00433	-2.436	7.274	1.778	-150.798	0.849	0.594	6898	0
GO:0002675	positive regulation of acute inflammatory response	0.00123	2.653	-0.631	1.23	1220.54	0.697	0.658	2675	0		GO:0050805	negative regulation of synaptic transmission	0.00022	-6.859	-1.505	0.477	272.311	0.788	0.656	50805	0		GO:0032097	positive regulation of response to food	0.00123	null	null	1.23	376.925	0.772	0.986	32105	1		GO:0043374	CD8-positive, alpha-beta T cell differentiation	0.00014	7.093	0.043	0.301	-164.574	0.775	0.594	43374	0
GO:0031348	negative regulation of defense response	0.00332	null	null	1.663	397.685	0.735	0.799	2675	1		GO:0051970	negative regulation of transmission of nerve impulse	0.00029	null	null	0.602	181.541	0.785	0.899	50805	1		GO:0032100	positive regulation of appetite	0.00115	null	null	1.204	376.925	0.745	0.944	32105	1		GO:0006707	cholesterol catabolic process	0.00051	-3.393	-4.814	0.845	-119.921	0.863	0.597	6707	0
GO:0002541	activation of plasma proteins involved in acute inflammatory response	0.0009	null	null	1.079	292.116	0.821	0.811	2675	1		GO:0060058	positive regulation of apoptosis involved in mammary gland involution	0.00029	-6.919	1.438	0.602	191.219	0.729	0.658	60058	0		GO:0032095	regulation of response to food	0.00202	null	null	1.447	304.015	0.795	0.987	32105	1		GO:0016127	sterol catabolic process	0.00051	null	null	0.845	-119.921	0.863	0.918	6707	1
GO:0050727	regulation of inflammatory response	0.00779	null	null	2.033	480.43	0.723	0.73	2675	1		GO:0006423	cysteinyl-tRNA aminoacylation	0.00014	2.909	6.227	0.301	227.422	0.892	0.66	6423	0		GO:0046165	alcohol biosynthetic process	0.00426	-2.341	3.969	1.771	200.945	0.891	0.615	46165	0		GO:0043353	enucleate erythrocyte differentiation	0.00051	6.508	0.984	0.845	-152.436	0.714	0.598	43353	0
GO:0050729	positive regulation of inflammatory response	0.00267	null	null	1.568	733.456	0.691	0.796	2675	1		GO:0042346	positive regulation of NF-kappaB import into nucleus	0.00267	1.15	-6.25	1.568	549.706	0.757	0.66	42346	0		GO:0008053	mitochondrial fusion	0.00051	-0.998	-7.697	0.845	273.888	0.888	0.617	8053	0		GO:0048002	antigen processing and presentation of peptide antigen	0.01465	3.994	-1.347	2.307	-583.609	0.895	0.598	48002	0
GO:0031349	positive regulation of defense response	0.00772	null	null	2.029	258.246	0.696	0.868	2675	1		GO:0050714	positive regulation of protein secretion	0.00289	null	null	1.602	271.307	0.755	0.817	42346	1		GO:0006516	glycoprotein catabolic process	0.00079	-1.397	1.52	1.041	281.612	0.904	0.619	6516	0		GO:0045981	positive regulation of nucleotide metabolic process	0.00166	-2.566	-5.852	1.362	-145.123	0.769	0.602	45981	0
GO:0032102	negative regulation of response to external stimulus	0.00462	null	null	1.806	387.485	0.746	0.817	2675	1		GO:0050715	positive regulation of cytokine secretion	0.00188	null	null	1.415	202.595	0.682	0.902	42346	1		GO:0021872	forebrain generation of neurons	0.00123	7.479	-0.498	1.23	307.278	0.824	0.626	21872	0		GO:0008343	adult feeding behavior	0.0018	6.102	1.156	1.398	-405.353	0.857	0.602	8343	0
GO:0032103	positive regulation of response to external stimulus	0.00635	null	null	1.944	398.537	0.715	0.844	2675	1		GO:0042993	positive regulation of transcription factor import into nucleus	0.00296	null	null	1.613	412.28	0.755	0.946	42346	1		GO:0006003	fructose 2,6-bisphosphate metabolic process	0.00043	-2.062	3.134	0.778	242.217	0.901	0.626	6003	0		GO:0042133	neurotransmitter metabolic process	0.00152	5.759	0.842	1.322	-124.136	0.761	0.605	42133	0
GO:0002673	regulation of acute inflammatory response	0.00173	null	null	1.38	696.825	0.739	0.852	2675	1		GO:0042990	regulation of transcription factor import into nucleus	0.00397	null	null	1.74	235.588	0.804	0.961	42346	1		GO:0032392	DNA geometric change	0.00087	-0.21	-0.142	1.079	225.307	0.975	0.627	32392	0		GO:0050663	cytokine secretion	0.00253	4.701	4.256	1.544	-227.851	0.791	0.607	50663	0
GO:0042346	positive regulation of NF-kappaB import into nucleus	0.00267	3.681	2.405	1.568	549.706	0.751	0.66	42346	0		GO:0051024	positive regulation of immunoglobulin secretion	0.00058	null	null	0.903	174.365	0.719	0.941	42346	1		GO:0043550	regulation of lipid kinase activity	0.00029	-3.136	3.227	0.602	224.454	0.837	0.627	43550	0		GO:0006700	C21-steroid hormone biosynthetic process	0.00072	-1.841	-1.218	1	-149.192	0.818	0.611	6700	0
GO:0032388	positive regulation of intracellular transport	0.0052	null	null	1.857	268.215	0.751	0.856	42346	1		GO:0051023	regulation of immunoglobulin secretion	0.00101	null	null	1.146	269.457	0.745	0.859	42346	1		GO:0050772	positive regulation of axonogenesis	0.00058	5.599	-4.558	0.903	236.721	0.677	0.638	50772	0		GO:0006998	nuclear envelope organization	0.00072	-1.671	7.128	1	-149.318	0.894	0.614	6998	0
GO:0042993	positive regulation of transcription factor import into nucleus	0.00296	null	null	1.613	412.28	0.749	0.946	42346	1		GO:0000060	protein import into nucleus, translocation	0.0013	null	null	1.255	261.249	0.901	0.737	42346	1		GO:0030516	regulation of axon extension	0.00051	null	null	0.845	178.545	0.676	0.805	50772	1		GO:0045768	positive regulation of anti-apoptosis	0.00072	0.799	-1.679	1	-119.17	0.808	0.624	45768	0
GO:0000060	protein import into nucleus, translocation	0.0013	null	null	1.255	331.431	0.913	0.737	42346	1		GO:0042345	regulation of NF-kappaB import into nucleus	0.00318	null	null	1.643	329.824	0.807	0.982	42346	1		GO:0043535	regulation of blood vessel endothelial cell migration	0.00123	-2.032	-4.302	1.23	274.781	0.847	0.638	43535	0		GO:0021872	forebrain generation of neurons	0.00123	7.331	1.203	1.23	-307.278	0.814	0.626	21872	0
GO:0042345	regulation of NF-kappaB import into nucleus	0.00318	null	null	1.643	329.824	0.811	0.982	42346	1		GO:0042307	positive regulation of protein import into nucleus	0.00484	null	null	1.826	412.28	0.747	0.937	42346	1		GO:0010594	regulation of endothelial cell migration	0.00238	null	null	1.519	205.811	0.842	0.886	43535	1		GO:0044058	regulation of digestive system process	0.00152	7.037	1.106	1.322	-120.709	0.79	0.627	44058	0
GO:0042307	positive regulation of protein import into nucleus	0.00484	null	null	1.826	412.28	0.741	0.937	42346	1		GO:0042308	negative regulation of protein import into nucleus	0.00144	null	null	1.301	192.176	0.792	0.797	42346	1		GO:0010596	negative regulation of endothelial cell migration	0.00108	null	null	1.176	274.781	0.813	0.891	43535	1		GO:0030300	regulation of intestinal cholesterol absorption	0.00094	null	null	1.114	-120.709	0.711	0.839	44058	1
GO:0046824	positive regulation of nucleocytoplasmic transport	0.0052	null	null	1.857	454.981	0.748	0.988	42346	1		GO:0046824	positive regulation of nucleocytoplasmic transport	0.0052	null	null	1.857	204.666	0.754	0.988	42346	1		GO:0043537	negative regulation of blood vessel endothelial cell migration	0.00072	null	null	1	274.781	0.817	0.923	43535	1		GO:0043550	regulation of lipid kinase activity	0.00029	-2.844	-4.374	0.602	-224.454	0.828	0.627	43550	0
GO:0043249	erythrocyte maturation	0.00036	-7.832	-0.423	0.699	329.19	0.769	0.662	43249	0		GO:0010893	positive regulation of steroid biosynthetic process	0.00058	2.293	4.181	0.903	709.081	0.777	0.662	10893	0		GO:0043536	positive regulation of blood vessel endothelial cell migration	0.00065	null	null	0.954	242.597	0.822	0.917	43535	1		GO:0045668	negative regulation of osteoblast differentiation	0.00087	6.591	0.266	1.079	-147.927	0.718	0.633	45668	0
GO:0010893	positive regulation of steroid biosynthetic process	0.00058	3.533	-5.36	0.903	709.081	0.768	0.662	10893	0		GO:0060557	positive regulation of vitamin D biosynthetic process	0.00036	null	null	0.699	709.081	0.752	0.878	10893	1		GO:0043589	skin morphogenesis	0.00043	7.993	-0.47	0.778	176.484	0.842	0.638	43589	0		GO:0021801	cerebral cortex radial glia guided migration	0.00029	5.741	3.194	0.602	-162.483	0.783	0.633	21801	0
GO:0045940	positive regulation of steroid metabolic process	0.00115	null	null	1.204	394.553	0.772	0.813	10893	1		GO:0060556	regulation of vitamin D biosynthetic process	0.00036	null	null	0.699	709.081	0.801	1	10893	1		GO:0051954	positive regulation of amine transport	0.00036	-1.238	-4.466	0.699	237.597	0.842	0.638	51954	0		GO:0021819	layer formation in cerebral cortex	0.00022	null	null	0.477	-162.483	0.784	0.955	21801	1
GO:0050810	regulation of steroid biosynthetic process	0.00217	null	null	1.477	267.223	0.812	0.879	10893	1		GO:0046889	positive regulation of lipid biosynthetic process	0.00144	null	null	1.301	203.189	0.764	0.826	10893	1		GO:0021892	cerebral cortex GABAergic interneuron differentiation	0.00022	7.593	-0.571	0.477	460.916	0.839	0.643	21892	0		GO:0021799	cerebral cortex radially oriented cell migration	0.00036	null	null	0.699	-121.862	0.781	0.876	21801	1
GO:0060557	positive regulation of vitamin D biosynthetic process	0.00036	null	null	0.699	709.081	0.749	0.878	10893	1		GO:0046136	positive regulation of vitamin metabolic process	0.00036	null	null	0.699	709.081	0.807	1	10893	1		GO:0042640	anagen	0.00051	7.817	-0.984	0.845	176.114	0.84	0.644	42640	0		GO:0002360	T cell lineage commitment	0.00043	7.511	0.035	0.778	-122.373	0.757	0.637	2360	0
GO:0060556	regulation of vitamin D biosynthetic process	0.00036	null	null	0.699	709.081	0.805	1	10893	1		GO:0030879	mammary gland development	0.0052	-8.013	1.535	1.857	340.96	0.856	0.663	30879	0		GO:0048820	hair follicle maturation	0.00058	null	null	0.903	176.114	0.849	0.814	42640	1		GO:0050772	positive regulation of axonogenesis	0.00058	4.708	4.671	0.903	-236.721	0.664	0.638	50772	0
GO:0046136	positive regulation of vitamin metabolic process	0.00036	null	null	0.699	709.081	0.805	1	10893	1		GO:0006651	diacylglycerol biosynthetic process	0.00014	3.177	6.409	0.301	716.483	0.871	0.667	6651	0		GO:0009948	anterior/posterior axis specification	0.00079	6.92	-0.403	1.041	241.095	0.868	0.645	9948	0		GO:0030516	regulation of axon extension	0.00051	null	null	0.845	-178.545	0.673	0.805	50772	1
GO:0050792	regulation of viral reproduction	0.00159	-0.421	-0.839	1.342	257.714	0.896	0.662	50792	0		GO:0046463	acylglycerol biosynthetic process	0.0013	null	null	1.255	523.974	0.852	0.857	6651	1		GO:0043271	negative regulation of ion transport	0.00087	-2.161	-3.583	1.079	177.346	0.837	0.645	43271	0		GO:0043535	regulation of blood vessel endothelial cell migration	0.00123	-2.098	3.778	1.23	-150.241	0.84	0.638	43535	0
GO:0030879	mammary gland development	0.0052	-7.849	-1.699	1.857	438.593	0.854	0.663	30879	0		GO:0046460	neutral lipid biosynthetic process	0.0013	null	null	1.255	523.974	0.882	0.729	6651	1		GO:0044269	glycerol ether catabolic process	0.00094	-3.693	4.942	1.114	207.468	0.89	0.649	44269	0		GO:0010596	negative regulation of endothelial cell migration	0.00108	null	null	1.176	-150.241	0.791	0.891	43535	1
GO:0006651	diacylglycerol biosynthetic process	0.00014	2.643	-6.647	0.301	716.483	0.88	0.667	6651	0		GO:0046474	glycerophospholipid biosynthetic process	0.00375	null	null	1.716	183.07	0.87	0.863	6651	1		GO:0033044	regulation of chromosome organization	0.00303	-0.683	-7.302	1.623	243.338	0.81	0.649	33044	0		GO:0043537	negative regulation of blood vessel endothelial cell migration	0.00072	null	null	1	-150.241	0.796	0.923	43535	1
GO:0046339	diacylglycerol metabolic process	0.00043	null	null	0.778	407.303	0.886	0.785	6651	1		GO:0019432	triglyceride biosynthetic process	0.00115	null	null	1.204	471.873	0.854	0.99	6651	1		GO:0021952	central nervous system projection neuron axonogenesis	0.00029	5.813	-4.656	0.602	223.978	0.776	0.654	21952	0		GO:0043589	skin morphogenesis	0.00043	7.701	1.233	0.778	-176.484	0.844	0.638	43589	0
GO:0046463	acylglycerol biosynthetic process	0.0013	null	null	1.255	523.974	0.862	0.857	6651	1		GO:0007159	leukocyte cell-cell adhesion	0.00173	0.04	-0.891	1.38	229.095	0.957	0.67	7159	0		GO:0016575	histone deacetylation	0.00159	-2.093	-5.558	1.342	214.434	0.837	0.659	16575	0		GO:0051954	positive regulation of amine transport	0.00036	-2.239	2.63	0.699	-237.597	0.814	0.638	51954	0
GO:0046460	neutral lipid biosynthetic process	0.0013	null	null	1.255	523.974	0.891	0.729	6651	1		GO:0042940	D-amino acid transport	0.00036	1.626	-6.654	0.699	836.458	0.912	0.671	42940	0		GO:0050795	regulation of behavior	0.00383	0.403	0.887	1.724	255.731	0.851	0.663	50795	0		GO:0021892	cerebral cortex GABAergic interneuron differentiation	0.00022	7.387	1.309	0.477	-460.916	0.831	0.643	21892	0
GO:0046474	glycerophospholipid biosynthetic process	0.00375	null	null	1.716	418.91	0.881	0.863	6651	1		GO:0009060	aerobic respiration	0.00491	-0.122	0.902	1.833	205.663	0.949	0.678	9060	0		GO:0046328	regulation of JNK cascade	0.00383	-0.993	3.058	1.724	195.816	0.818	0.664	46328	0		GO:0010870	positive regulation of receptor biosynthetic process	0.00043	-1.478	-3.918	0.778	-150.173	0.811	0.643	10870	0
GO:0019432	triglyceride biosynthetic process	0.00115	null	null	1.204	471.873	0.863	0.99	6651	1		GO:0015810	aspartate transport	0.00043	1.597	-6.722	0.778	836.458	0.903	0.679	15810	0		GO:0070302	regulation of stress-activated protein kinase signaling cascade	0.0039	null	null	1.732	184.297	0.819	0.963	46328	1		GO:0043271	negative regulation of ion transport	0.00087	-1.643	2.846	1.079	-177.346	0.807	0.645	43271	0
GO:0042940	D-amino acid transport	0.00036	1.119	4.59	0.699	836.458	0.921	0.671	42940	0		GO:0015813	L-glutamate transport	0.00094	null	null	1.114	285.783	0.898	0.947	15810	1		GO:0043409	negative regulation of MAPKKK cascade	0.0026	null	null	1.556	184.909	0.791	0.78	46328	1		GO:0010256	endomembrane system organization	0.0014	-1.512	6.855	1.279	-149.318	0.902	0.648	10256	0
GO:0045652	regulation of megakaryocyte differentiation	0.00051	-7.259	-0.772	0.845	467.23	0.716	0.678	45652	0		GO:0006835	dicarboxylic acid transport	0.00101	1.835	-7.743	1.146	223.527	0.908	0.683	6835	0		GO:0046503	glycerolipid catabolic process	0.00101	-2.129	2.571	1.146	207.468	0.884	0.668	46503	0		GO:0033044	regulation of chromosome organization	0.00303	-1.783	7.22	1.623	-194.564	0.811	0.649	33044	0
GO:0015810	aspartate transport	0.00043	1.176	4.649	0.778	836.458	0.911	0.679	15810	0		GO:0001541	ovarian follicle development	0.00224	-7.575	0.898	1.491	250.781	0.821	0.685	1541	0		GO:0046461	neutral lipid catabolic process	0.00094	null	null	1.114	207.468	0.886	0.792	46503	1		GO:0050866	negative regulation of cell activation	0.00339	2.674	-1.227	1.672	-129.387	0.79	0.653	50866	0
GO:0015813	L-glutamate transport	0.00094	null	null	1.114	285.783	0.907	0.947	15810	1		GO:0022602	ovulation cycle process	0.0039	null	null	1.732	185.251	0.851	0.949	1541	1		GO:0009395	phospholipid catabolic process	0.00115	null	null	1.204	175.234	0.882	0.804	46503	1		GO:0021952	central nervous system projection neuron axonogenesis	0.00029	4.903	5.391	0.602	-223.978	0.777	0.654	21952	0
GO:0060068	vagina development	0.00058	-5.782	-2.096	0.903	285.515	0.887	0.685	60068	0		GO:0042698	ovulation cycle	0.0039	null	null	1.732	185.251	0.851	0.889	1541	1		GO:0014911	positive regulation of smooth muscle cell migration	0.00051	-0.899	-4.147	0.845	227.143	0.83	0.671	14911	0		GO:0034443	negative regulation of lipoprotein oxidation	0.00014	-2.331	-3.321	0.301	-125.016	0.802	0.655	34443	0
GO:0045682	regulation of epidermis development	0.00108	-7.607	-1.68	1.176	298.294	0.786	0.685	45682	0		GO:0007340	acrosome reaction	0.00051	-0.19	-7.114	0.845	708.226	0.845	0.687	7340	0		GO:0002504	antigen processing and presentation of peptide or polysaccharide antigen via MHC class II	0.03327	3.465	2.152	2.664	405.214	0.894	0.677	2504	0		GO:0034442	regulation of lipoprotein oxidation	0.00014	null	null	0.301	-125.016	0.866	1	34443	1
GO:0007340	acrosome reaction	0.00051	-1.181	4.771	0.845	708.226	0.862	0.687	7340	0		GO:0007338	single fertilization	0.00274	null	null	1.58	547.445	0.929	0.825	7340	1		GO:0001759	organ induction	0.00173	6.777	0.175	1.38	208.661	0.702	0.683	1759	0		GO:0016575	histone deacetylation	0.00159	-3.136	5.682	1.342	-214.434	0.838	0.659	16575	0
GO:0007338	single fertilization	0.00274	null	null	1.58	547.445	0.941	0.825	7340	1		GO:0007339	binding of sperm to zona pellucida	0.00087	null	null	1.079	323.222	0.848	0.859	7340	1		GO:0045168	cell-cell signaling involved in cell fate commitment	0.00195	null	null	1.431	185.476	0.841	0.759	1759	1		GO:0006476	protein deacetylation	0.00238	null	null	1.519	-155.952	0.917	0.96	16575	1
GO:0007339	binding of sperm to zona pellucida	0.00087	null	null	1.079	323.222	0.859	0.859	7340	1		GO:0035036	sperm-egg recognition	0.00087	null	null	1.079	323.222	0.848	0.999	7340	1		GO:0031128	developmental induction	0.00195	null	null	1.431	185.476	0.84	0.989	1759	1		GO:0007026	negative regulation of microtubule depolymerization	0.00087	-1.292	6.048	1.079	-179.57	0.755	0.664	7026	0
GO:0035036	sperm-egg recognition	0.00087	null	null	1.079	323.222	0.859	0.999	7340	1		GO:0017156	calcium ion-dependent exocytosis	0.00202	null	null	1.447	193.569	0.889	0.724	7340	1		GO:0007006	mitochondrial membrane organization	0.00195	-0.471	-7.176	1.431	218.383	0.878	0.685	7006	0		GO:0031111	negative regulation of microtubule polymerization or depolymerization	0.0013	null	null	1.255	-150.665	0.759	0.921	7026	1
GO:0017156	calcium ion-dependent exocytosis	0.00202	null	null	1.447	350.79	0.897	0.724	7340	1		GO:0009988	cell-cell recognition	0.00087	null	null	1.079	323.222	0.895	0.868	7340	1		GO:0070584	mitochondrion morphogenesis	0.00051	4.985	-5.265	0.845	192.782	0.791	0.685	70584	0		GO:0031114	regulation of microtubule depolymerization	0.00087	null	null	1.079	-179.57	0.81	0.977	7026	1
GO:0009988	cell-cell recognition	0.00087	null	null	1.079	323.222	0.897	0.868	7340	1		GO:0045777	positive regulation of blood pressure	0.00094	-6.844	0.122	1.114	327.026	0.836	0.687	45777	0		GO:0050663	cytokine secretion	0.00253	4.86	-4.018	1.544	227.851	0.815	0.687	50663	0		GO:0006907	pinocytosis	0.00072	-2.227	6.772	1	-135.213	0.866	0.669	6907	0
GO:0003084	positive regulation of systemic arterial blood pressure	0.00014	-6.142	-0.175	0.301	386.792	0.86	0.687	3084	0		GO:0008217	regulation of blood pressure	0.00426	null	null	1.771	195.47	0.82	0.743	45777	1		GO:0021895	cerebral cortex neuron differentiation	0.00065	7.68	-0.548	0.954	425.039	0.828	0.689	21895	0		GO:0014911	positive regulation of smooth muscle cell migration	0.00051	-1.978	2.44	0.845	-227.143	0.811	0.671	14911	0
GO:0032497	detection of lipopolysaccharide	0.00065	-0.039	5.628	0.954	429.658	0.851	0.688	32497	0		GO:0006435	threonyl-tRNA aminoacylation	0.00029	2.952	6.257	0.602	210.991	0.888	0.688	6435	0		GO:0015809	arginine transport	0.00051	-1.995	-4.359	0.845	520.509	0.937	0.691	15809	0		GO:0002504	antigen processing and presentation of peptide or polysaccharide antigen via MHC class II	0.03327	3.868	-1.344	2.664	-391.903	0.887	0.677	2504	0
GO:0032490	detection of molecule of bacterial origin	0.00144	null	null	1.301	286.438	0.843	0.921	32497	1		GO:0032497	detection of lipopolysaccharide	0.00065	1.616	-1.539	0.954	210.256	0.874	0.688	32497	0		GO:0032509	endosome transport via multivesicular body sorting pathway	0.00022	-2.158	-4.818	0.477	202.726	0.931	0.691	32509	0		GO:0007266	Rho protein signal transduction	0.00664	-0.687	-2.365	1.964	-126.125	0.87	0.683	7266	0
GO:0032609	interferon-gamma production	0.00433	-6.814	-0.556	1.778	259.939	0.885	0.689	32609	0		GO:0031960	response to corticosteroid stimulus	0.0013	2.144	-1.244	1.255	199.221	0.92	0.692	31960	0		GO:0045022	early endosome to late endosome transport	0.00043	null	null	0.778	202.726	0.928	0.721	32509	1		GO:0021978	telencephalon regionalization	0.00079	7.571	1.245	1.041	-149.536	0.826	0.686	21978	0
GO:0031960	response to corticosteroid stimulus	0.0013	0.63	6.052	1.255	273.5	0.907	0.692	31960	0		GO:0050901	leukocyte tethering or rolling	0.00051	1.011	-7.604	0.845	709.081	0.843	0.693	50901	0		GO:0009886	post-embryonic morphogenesis	0.00051	7.11	-0.601	0.845	209.938	0.854	0.693	9886	0		GO:0009306	protein secretion	0.00484	-2.134	4.153	1.826	-150.099	0.904	0.687	9306	0
GO:0050901	leukocyte tethering or rolling	0.00051	-0.576	5.215	0.845	709.081	0.836	0.693	50901	0		GO:0046504	glycerol ether biosynthetic process	0.00144	2.66	6.333	1.301	449.12	0.895	0.696	46504	0		GO:0000185	activation of MAPKKK activity	0.00029	-2.852	2.794	0.602	232.65	0.818	0.694	185	0		GO:0015809	arginine transport	0.00051	-2.095	3.794	0.845	-285.299	0.924	0.691	15809	0
GO:0046504	glycerol ether biosynthetic process	0.00144	2.354	-6.395	1.301	449.12	0.904	0.696	46504	0		GO:0006662	glycerol ether metabolic process	0.00462	null	null	1.806	205.683	0.913	0.893	46504	1		GO:0032104	regulation of response to extracellular stimulus	0.00231	0.241	0.704	1.505	341.961	0.808	0.696	32104	0		GO:0032509	endosome transport via multivesicular body sorting pathway	0.00022	-2.173	4.281	0.477	-202.726	0.92	0.691	32509	0
GO:0006662	glycerol ether metabolic process	0.00462	null	null	1.806	281.615	0.923	0.893	46504	1		GO:0006639	acylglycerol metabolic process	0.00325	null	null	1.653	223.568	0.858	0.975	46504	1		GO:0042594	response to starvation	0.00303	null	null	1.623	194.306	0.868	0.776	32104	1		GO:0045022	early endosome to late endosome transport	0.00043	null	null	0.778	-202.726	0.917	0.721	32509	1
GO:0006639	acylglycerol metabolic process	0.00325	null	null	1.653	306.103	0.869	0.958	46504	1		GO:0006641	triglyceride metabolic process	0.00289	null	null	1.602	211.675	0.859	0.948	46504	1		GO:0032098	regulation of appetite	0.00217	null	null	1.477	304.015	0.802	0.739	32104	1		GO:0045058	T cell selection	0.00144	7.284	0.114	1.301	-137.652	0.741	0.693	45058	0
GO:0001938	positive regulation of endothelial cell proliferation	0.00202	2.717	-2.489	1.447	327.777	0.819	0.698	1938	0		GO:0001938	positive regulation of endothelial cell proliferation	0.00202	-2.115	0.135	1.447	267.387	0.837	0.698	1938	0		GO:0035136	forelimb morphogenesis	0.00072	6.97	-0.524	1	184.28	0.857	0.698	35136	0		GO:0033077	T cell differentiation in thymus	0.00346	null	null	1.681	-136.666	0.725	0.788	45058	1
																																				GO:0009886	post-embryonic morphogenesis	0.00051	7.003	1.259	0.845	-119.149	0.852	0.693	9886	0
																																				GO:0043968	histone H2A acetylation	0.00043	-2.747	5.868	0.778	-139.02	0.851	0.695	43968	0

## Sheet: REVIGO table results GO CC
CELLULAR COMPONENT
ACTIVATED DURING LACTATION											Total unique	ACTIVATED DURING LACTATION											Total unique	INHIBITED DURING LACTATION											Total unique	INHIBITED DURING LACTATION											Total unique
ONLY IMPACT RESULTS											156	DIRECTION OF THE IMPACT RESULTS											160	ONLY IMPACT RESULTS											151	DIRECTION OF THE IMPACT RESULTS											149
term ID	description	frequency	plot_X	plot_Y	plot_size	value	uniqueness	dispensability	representative	eliminated		term ID	description	frequency	plot_X	plot_Y	plot_size	value	uniqueness	dispensability	representative	eliminated		term ID	description	frequency	plot_X	plot_Y	plot_size	value	uniqueness	dispensability	representative	eliminated		term ID	description	frequency	plot_X	plot_Y	plot_size	value	uniqueness	dispensability	representative	eliminated
GO:0005576	extracellular region	0.10514	-0.121	-0.097	3.159	178.636	0.993	0	5576	0		GO:0005576	extracellular region	0.10514	0.052	-0.133	3.159	94.2979	0.993	0	5576	0		GO:0005719	nuclear euchromatin	0.00029	-7.277	3.397	0.602	606.999	0.658	0	5719	0		GO:0005584	collagen type I	0.00036	0.931	-0.953	0.699	-176.484	0.929	0	5584	0
GO:0005614	interstitial matrix	0.00058	-0.773	-2.045	0.903	589.97	0.965	0	5614	0		GO:0005614	interstitial matrix	0.00058	-0.943	1.705	0.903	461.844	0.965	0	5614	0		GO:0005720	nuclear heterochromatin	0.00168	null	null	1.362	181.07	0.617	0.828	5719	1		GO:0005719	nuclear euchromatin	0.00029	-7.141	3.537	0.602	-606.999	0.658	0	5719	0
GO:0042765	GPI-anchor transamidase complex	0.00022	4.529	-1.585	0.477	2342.09	0.679	0	42765	0		GO:0042765	GPI-anchor transamidase complex	0.00022	4.375	2.681	0.477	2198.82	0.679	0	42765	0		GO:0000785	chromatin	0.01501	null	null	2.314	163.946	0.652	0.792	5719	1		GO:0005720	nuclear heterochromatin	0.00168	null	null	1.362	-89.9234	0.617	0.814	5719	1
GO:0031301	integral to organelle membrane	0.00707	null	null	1.987	186.141	0.68	0.906	42765	1		GO:0031301	integral to organelle membrane	0.00707	null	null	1.987	93.9958	0.68	0.906	42765	1		GO:0000775	chromosome, centromeric region	0.00656	null	null	1.954	87.8763	0.674	0.726	5719	1		GO:0000786	nucleosome	0.00692	null	null	1.978	-15.1573	0.609	0.787	5719	1
GO:0031228	intrinsic to Golgi membrane	0.00248	null	null	1.531	78.5497	0.646	0.799	42765	1		GO:0031228	intrinsic to Golgi membrane	0.00248	null	null	1.531	18.5006	0.646	0.799	42765	1		GO:0000790	nuclear chromatin	0.00372	null	null	1.708	206.397	0.6	0.891	5719	1		GO:0000785	chromatin	0.01501	null	null	2.314	-53.4074	0.652	0.737	5719	1
GO:0031227	intrinsic to endoplasmic reticulum membrane	0.00386	null	null	1.724	271.743	0.64	0.83	42765	1		GO:0031227	intrinsic to endoplasmic reticulum membrane	0.00386	null	null	1.724	171.072	0.64	0.83	42765	1		GO:0005664	nuclear origin of replication recognition complex	0.00044	null	null	0.778	16.2786	0.6	0.74	5719	1		GO:0000775	chromosome, centromeric region	0.00656	null	null	1.954	-39.0892	0.674	0.782	5719	1
GO:0030173	integral to Golgi membrane	0.00248	null	null	1.531	78.5497	0.645	0.825	42765	1		GO:0030173	integral to Golgi membrane	0.00248	null	null	1.531	18.5006	0.645	0.825	42765	1		GO:0044454	nuclear chromosome part	0.00736	null	null	2.004	198.629	0.582	0.717	5719	1		GO:0000792	heterochromatin	0.00291	null	null	1.602	-77.7246	0.688	0.724	5719	1
GO:0030176	integral to endoplasmic reticulum membrane	0.0027	null	null	1.568	307.952	0.648	0.772	42765	1		GO:0030176	integral to endoplasmic reticulum membrane	0.0027	null	null	1.568	192.9	0.648	0.772	42765	1		GO:0044427	chromosomal part	0.0247	null	null	2.53	140.651	0.64	0.879	5719	1		GO:0000790	nuclear chromatin	0.00372	null	null	1.708	-83.6241	0.6	0.71	5719	1
GO:0045202	synapse	0.01392	0.085	-0.074	2.281	207.161	0.993	0	45202	0		GO:0045202	synapse	0.01392	-0.093	-0.099	2.281	66.6036	0.993	0	45202	0		GO:0001739	sex chromatin	0.00102	null	null	1.146	164.861	0.629	0.877	5719	1		GO:0005664	nuclear origin of replication recognition complex	0.00044	null	null	0.778	-16.2786	0.6	0.732	5719	1
GO:0001917	photoreceptor inner segment	0.00051	-0.471	0.541	0.845	333.209	0.991	0.001	1917	0		GO:0001917	photoreceptor inner segment	0.00051	-1.238	-0.119	0.845	333.209	0.991	0.001	1917	0		GO:0001741	XY body	0.00044	null	null	0.778	65.7006	0.648	0.932	5719	1		GO:0044454	nuclear chromosome part	0.00736	null	null	2.004	-3.4598	0.582	0.891	5719	1
GO:0045177	apical part of cell	0.0086	-0.029	-0.027	2.072	211.339	0.99	0.001	45177	0		GO:0000299	integral to membrane of membrane fraction	0.0008	-1.646	-1.272	1.041	151.376	0.968	0.001	299	0		GO:0031594	neuromuscular junction	0.00211	-0.377	-0.765	1.462	78.3095	0.985	0	31594	0		GO:0044427	chromosomal part	0.0247	null	null	2.53	-24.9534	0.64	0.879	5719	1
GO:0000299	integral to membrane of membrane fraction	0.0008	-1.628	0.366	1.041	151.376	0.968	0.001	299	0		GO:0045177	apical part of cell	0.0086	-0.008	-0.011	2.072	125.811	0.99	0.001	45177	0		GO:0031974	membrane-enclosed lumen	0.07439	0.292	-0.38	3.009	104.277	0.992	0	31974	0		GO:0001739	sex chromatin	0.00102	null	null	1.146	-13.7758	0.629	0.932	5719	1
GO:0030427	site of polarized growth	0.00204	-0.346	0.266	1.447	137.061	0.991	0.001	30427	0		GO:0030427	site of polarized growth	0.00204	-1.137	-0.083	1.447	113.421	0.991	0.001	30427	0		GO:0031254	trailing edge	0.00029	0.343	-0.736	0.602	88.2229	0.989	0.001	31254	0		GO:0001741	XY body	0.00044	null	null	0.778	-65.7006	0.648	0.824	5719	1
GO:0030496	midbody	0.00313	-0.259	0.032	1.633	116.365	0.991	0.001	30496	0		GO:0030496	midbody	0.00313	-0.215	-0.243	1.633	36.7447	0.991	0.001	30496	0		GO:0042612	MHC class I protein complex	0.02157	3.937	6.128	2.471	590.637	0.757	0.001	42612	0		GO:0031594	neuromuscular junction	0.00211	-0.291	-0.879	1.462	-78.3095	0.985	0	31594	0
GO:0043025	neuronal cell body	0.00532	-0.119	0.01	1.863	181.645	0.985	0.001	43025	0		GO:0043025	neuronal cell body	0.00532	-0.639	-0.109	1.863	80.6372	0.985	0.001	43025	0		GO:0042613	MHC class II protein complex	0.03905	null	null	2.729	377.359	0.744	0.744	42612	1		GO:0031974	membrane-enclosed lumen	0.07439	0.368	-0.801	3.009	-2.0444	0.992	0	31974	0
GO:0043204	perikaryon	0.00044	null	null	0.778	83.1181	0.985	0.797	43025	1		GO:0043204	perikaryon	0.00044	null	null	0.778	6.2613	0.985	0.797	43025	1		GO:0032391	photoreceptor connecting cilium	0.00058	1.187	-3.757	0.903	208.4	0.934	0.001	32391	0		GO:0031254	trailing edge	0.00029	0.512	-0.768	0.602	-88.2229	0.989	0.001	31254	0
GO:0009986	cell surface	0.02302	-0.101	0.062	2.5	141.976	0.99	0.001	9986	0		GO:0031975	envelope	0.04743	-0.635	0.091	2.814	30.2264	0.99	0.002	31975	0		GO:0031513	nonmotile primary cilium	0.00204	null	null	1.447	137.115	0.929	0.887	32391	1		GO:0031512	motile primary cilium	0.00029	1.074	-3.448	0.602	-149.318	0.936	0.001	31512	0
GO:0042995	cell projection	0.02849	-0.351	0.026	2.592	119.941	0.99	0.002	42995	0		GO:0009986	cell surface	0.02302	-0.555	-0.086	2.5	23.2384	0.99	0.002	9986	0		GO:0031512	motile primary cilium	0.00029	null	null	0.602	149.318	0.936	0.776	32391	1		GO:0032391	photoreceptor connecting cilium	0.00058	null	null	0.903	-3.1024	0.934	0.776	31512	1
GO:0000267	cell fraction	0.02652	-0.402	0.487	2.561	96.8546	0.99	0.002	267	0		GO:0000267	cell fraction	0.02652	-1.157	-0.098	2.561	4.3174	0.99	0.002	267	0		GO:0032154	cleavage furrow	0.00124	0.129	-0.336	1.23	369.818	0.98	0.001	32154	0		GO:0031513	nonmotile primary cilium	0.00204	null	null	1.447	-1.7396	0.929	0.887	31512	1
GO:0031975	envelope	0.04743	-0.157	-0.038	2.814	114.05	0.99	0.002	31975	0		GO:0042995	cell projection	0.02849	-0.297	-0.139	2.592	4.6445	0.99	0.002	42995	0		GO:0032155	cell division site part	0.00131	null	null	1.255	369.818	0.98	0.994	32154	1		GO:0042612	MHC class I protein complex	0.02157	4.179	5.777	2.471	-547.816	0.757	0.001	42612	0
GO:0012505	endomembrane system	0.05268	-0.267	0.216	2.859	121.164	0.99	0.002	12505	0		GO:0012505	endomembrane system	0.05268	-0.793	-0.203	2.859	37.6325	0.99	0.002	12505	0		GO:0032153	cell division site	0.00131	0.162	-0.326	1.255	369.818	0.989	0.001	32153	0		GO:0042613	MHC class II protein complex	0.03905	null	null	2.729	-360.72	0.744	0.744	42612	1
GO:0019867	outer membrane	0.00539	-1.516	0.023	1.869	169.596	0.931	0.058	19867	0		GO:0045211	postsynaptic membrane	0.00539	-0.474	-0.147	1.869	214.482	0.914	0.058	45211	0		GO:0005625	soluble fraction	0.00474	0.571	-0.777	1.813	150.355	0.989	0.001	5625	0		GO:0032154	cleavage furrow	0.00124	0.192	-0.423	1.23	-369.818	0.98	0.001	32154	0
GO:0031982	vesicle	0.03301	0.056	1.222	2.656	130.61	0.908	0.062	31982	0		GO:0008021	synaptic vesicle	0.00379	null	null	1.716	57.5861	0.731	0.848	45211	1		GO:0031252	cell leading edge	0.00663	0.298	-0.543	1.959	97.9854	0.989	0.001	31252	0		GO:0032155	cell division site part	0.00131	null	null	1.255	-369.818	0.98	0.994	32154	1
GO:0048475	coated membrane	0.00525	-1.256	-0.039	1.857	82.2961	0.932	0.075	48475	0		GO:0044456	synapse part	0.00984	null	null	2.13	111.137	0.975	0.856	45211	1		GO:0016234	inclusion body	0.00131	0.276	-0.392	1.255	104.703	0.937	0.033	16234	0		GO:0032153	cell division site	0.00131	0.221	-0.483	1.255	-369.818	0.989	0.001	32153	0
GO:0045121	membrane raft	0.00663	-2.579	-0.16	1.959	175.815	0.908	0.087	45121	0		GO:0030136	clathrin-coated vesicle	0.00721	null	null	1.996	36.9092	0.734	0.885	45211	1		GO:0005771	multivesicular body	0.0016	-0.148	-3.553	1.342	215.886	0.837	0.068	5771	0		GO:0005625	soluble fraction	0.00474	0.573	-0.88	1.813	-3.7484	0.989	0.001	5625	0
GO:0031225	anchored to membrane	0.00328	-3.334	-1.134	1.653	135.502	0.909	0.109	31225	0		GO:0014069	postsynaptic density	0.00109	null	null	1.176	211.477	0.765	0.76	45211	1		GO:0043228	non-membrane-bounded organelle	0.13428	-1.075	-1.398	3.266	103.733	0.889	0.087	43228	0		GO:0031252	cell leading edge	0.00663	0.549	-0.82	1.959	-34.5704	0.989	0.001	31252	0
GO:0019898	extrinsic to membrane	0.00605	-3.18	-0.225	1.919	101.471	0.909	0.116	19898	0		GO:0031982	vesicle	0.03301	0.334	-1.418	2.656	6.9094	0.908	0.062	31982	0		GO:0016528	sarcoplasm	0.00226	0.192	-0.738	1.491	62.7307	0.907	0.088	16528	0		GO:0016234	inclusion body	0.00131	0.339	-0.705	1.255	-104.703	0.937	0.033	16234	0
GO:0001669	acrosomal vesicle	0.00131	2.12	4.146	1.255	410.737	0.782	0.122	1669	0		GO:0048475	coated membrane	0.00525	-0.845	-0.337	1.857	33.0123	0.932	0.075	48475	0		GO:0005776	autophagic vacuole	0.00066	-0.197	-3.118	0.954	153.335	0.864	0.133	5776	0		GO:0005771	multivesicular body	0.0016	-0.319	-3.879	1.342	-189.264	0.837	0.068	5771	0
GO:0005786	signal recognition particle, endoplasmic reticulum targeting	0.00036	3.255	-2.447	0.699	44.403	0.82	0.126	5786	0		GO:0019867	outer membrane	0.00539	-1.313	-0.522	1.869	70.9442	0.931	0.076	19867	0		GO:0042589	zymogen granule membrane	0.00022	-4.78	-1.113	0.477	270.813	0.752	0.136	42589	0		GO:0043228	non-membrane-bounded organelle	0.13428	-0.836	-1.818	3.266	-9.8327	0.889	0.087	43228	0
GO:0070469	respiratory chain	0.0188	-3.478	-0.453	2.412	60.816	0.899	0.13	70469	0		GO:0019898	extrinsic to membrane	0.00605	-3.107	-0.09	1.919	34.7833	0.909	0.087	19898	0		GO:0001939	female pronucleus	0.00058	-2.896	1.377	0.903	130.11	0.871	0.14	1939	0		GO:0016528	sarcoplasm	0.00226	0.279	-0.862	1.491	-32.9785	0.907	0.088	16528	0
GO:0005811	lipid particle	0.00066	1.726	4.059	0.954	153.745	0.871	0.131	5811	0		GO:0031225	anchored to membrane	0.00328	-3.321	0.775	1.653	1.7057	0.909	0.109	31225	0		GO:0001673	male germ cell nucleus	0.00036	-2.147	1.178	0.699	43.8004	0.875	0.142	1673	0		GO:0005776	autophagic vacuole	0.00066	-0.357	-3.479	0.954	-76.8961	0.864	0.133	5776	0
GO:0032045	guanyl-nucleotide exchange factor complex	7e-05	1.311	-5.709	0	36.7776	0.884	0.139	32045	0		GO:0001669	acrosomal vesicle	0.00131	2.995	-3.632	1.255	410.737	0.782	0.122	1669	0		GO:0043073	germ cell nucleus	0.00051	-2.693	1.302	0.845	26.2803	0.872	0.145	43073	0		GO:0001939	female pronucleus	0.00058	-3.008	1.859	0.903	-130.11	0.871	0.14	1939	0
GO:0055037	recycling endosome	0.00168	2.147	4.91	1.362	375.403	0.85	0.141	55037	0		GO:0070469	respiratory chain	0.0188	-3.655	0.252	2.412	20.4733	0.899	0.129	70469	0		GO:0005802	trans-Golgi network	0.00248	-5.047	0.968	1.531	149.671	0.765	0.159	5802	0		GO:0001673	male germ cell nucleus	0.00036	-2.208	1.464	0.699	-43.8004	0.875	0.142	1673	0
GO:0005793	ER-Golgi intermediate compartment	0.00204	2.23	4.415	1.447	156.274	0.86	0.146	5793	0		GO:0048500	signal recognition particle	0.00051	3.371	3.065	0.845	44.403	0.816	0.129	48500	0		GO:0005768	endosome	0.01632	-0.39	-3.678	2.35	104.227	0.826	0.181	5768	0		GO:0005779	integral to peroxisomal membrane	0.00058	-4.92	0.784	0.903	-201.192	0.766	0.144	5779	0
GO:0000784	nuclear chromosome, telomeric region	0.00095	6.794	0.914	1.114	879.694	0.76	0.146	784	0		GO:0045121	membrane raft	0.00663	-2.756	0.221	1.959	19.4421	0.908	0.13	45121	0		GO:0042627	chylomicron	0.0008	3.386	3.848	1.041	195.914	0.796	0.185	42627	0		GO:0031231	intrinsic to peroxisomal membrane	0.00058	null	null	0.903	-201.192	0.767	0.845	5779	1
GO:0000794	condensed nuclear chromosome	0.00211	null	null	1.462	223.812	0.747	0.713	784	1		GO:0005811	lipid particle	0.00066	2.573	-3.754	0.954	110.01	0.871	0.131	5811	0		GO:0034385	triglyceride-rich lipoprotein particle	0.00109	null	null	1.176	137.218	0.792	0.887	42627	1		GO:0043073	germ cell nucleus	0.00051	-2.772	1.734	0.845	-26.2803	0.872	0.145	43073	0
GO:0005892	nicotinic acetylcholine-gated receptor-channel complex	0.00066	-2.638	-4.915	0.954	500.73	0.779	0.158	5892	0		GO:0032045	guanyl-nucleotide exchange factor complex	7e-05	0.786	6.068	0	36.7776	0.884	0.139	32045	0		GO:0034358	plasma lipoprotein particle	0.00233	null	null	1.505	103.383	0.781	0.987	42627	1		GO:0045335	phagocytic vesicle	0.00211	-0.755	-4.954	1.462	-108.302	0.812	0.146	45335	0
GO:0045120	pronucleus	0.00117	1.406	-0.522	1.204	262.582	0.898	0.159	45120	0		GO:0055037	recycling endosome	0.00168	3.307	-4.495	1.362	191.862	0.85	0.141	55037	0		GO:0034363	intermediate-density lipoprotein particle	0.00044	null	null	0.778	119.921	0.803	0.936	42627	1		GO:0030670	phagocytic vesicle membrane	0.00066	null	null	0.954	-35.0466	0.735	0.804	45335	1
GO:0045277	respiratory chain complex IV	0.00029	1.524	-5.966	0.602	17.0473	0.83	0.161	45277	0		GO:0005793	ER-Golgi intermediate compartment	0.00204	3.21	-3.878	1.447	137.351	0.86	0.146	5793	0		GO:0034364	high-density lipoprotein particle	0.00204	null	null	1.447	112.755	0.783	0.929	42627	1		GO:0030666	endocytic vesicle membrane	0.00168	null	null	1.362	-35.0466	0.717	0.865	45335	1
GO:0005851	eukaryotic translation initiation factor 2B complex	0.00044	3.302	-4.101	0.778	66.2644	0.817	0.165	5851	0		GO:0000784	nuclear chromosome, telomeric region	0.00095	6.78	0.141	1.114	771.903	0.76	0.146	784	0		GO:0034361	very-low-density lipoprotein particle	0.00109	null	null	1.176	137.218	0.791	0.867	42627	1		GO:0005802	trans-Golgi network	0.00248	-5.143	0.933	1.531	-121.3	0.765	0.167	5802	0
GO:0031372	UBC13-MMS2 complex	0.00044	1.908	-6.496	0.778	109.375	0.871	0.165	31372	0		GO:0000794	condensed nuclear chromosome	0.00211	null	null	1.462	223.812	0.747	0.713	784	1		GO:0034362	low-density lipoprotein particle	0.00066	null	null	0.954	97.8674	0.798	0.836	42627	1		GO:0005768	endosome	0.01632	-0.709	-3.992	2.35	-25.1897	0.826	0.181	5768	0
GO:0005952	cAMP-dependent protein kinase complex	0.00051	1.797	-5.964	0.845	84.4941	0.87	0.167	5952	0		GO:0042579	microbody	0.00415	3.783	-4.517	1.756	99.2222	0.838	0.157	42579	0		GO:0034366	spherical high-density lipoprotein particle	0.00058	null	null	0.903	174.72	0.8	0.83	42627	1		GO:0031984	organelle subcompartment	0.00255	-6.267	2.912	1.544	-44.2174	0.801	0.188	31984	0
GO:0031371	ubiquitin conjugating enzyme complex	0.00051	1.966	-6.628	0.845	109.375	0.87	0.167	31371	0		GO:0005892	nicotinic acetylcholine-gated receptor-channel complex	0.00066	-2.496	5.267	0.954	500.73	0.779	0.158	5892	0		GO:0031984	organelle subcompartment	0.00255	-6.333	2.643	1.544	95.3718	0.801	0.188	31984	0		GO:0005968	Rab-protein geranylgeranyltransferase complex	0.00015	2.03	3.493	0.301	-136.236	0.804	0.196	5968	0
GO:0019773	proteasome core complex, alpha-subunit complex	0.00066	2.14	-7.147	0.954	23.9722	0.867	0.17	19773	0		GO:0045120	pronucleus	0.00117	0.992	0.909	1.204	97.2325	0.898	0.159	45120	0		GO:0005968	Rab-protein geranylgeranyltransferase complex	0.00015	1.851	3.762	0.301	136.236	0.804	0.196	5968	0		GO:0030877	beta-catenin destruction complex	0.00015	2.407	3.74	0.301	-15.1359	0.804	0.196	30877	0
GO:0005795	Golgi stack	0.00299	5.684	3.446	1.613	544.915	0.758	0.176	5795	0		GO:0045277	respiratory chain complex IV	0.00029	1.004	6.38	0.602	17.0473	0.83	0.161	45277	0		GO:0030877	beta-catenin destruction complex	0.00015	2.218	3.975	0.301	15.1359	0.804	0.196	30877	0		GO:0005955	calcineurin complex	0.00022	2.284	5.447	0.477	-74.2791	0.826	0.203	5955	0
GO:0000139	Golgi membrane	0.01479	null	null	2.307	100.809	0.622	0.776	5795	1		GO:0005851	eukaryotic translation initiation factor 2B complex	0.00044	3.146	4.768	0.778	21.9333	0.817	0.165	5851	0		GO:0005863	striated muscle myosin thick filament	7e-05	-3.152	3.873	0	521.082	0.69	0.197	5863	0		GO:0000159	protein phosphatase type 2A complex	0.00073	null	null	1	-54.0268	0.812	0.777	5955	1
GO:0030880	RNA polymerase complex	0.00153	2.183	-7.076	1.322	189.183	0.859	0.18	30880	0		GO:0031372	UBC13-MMS2 complex	0.00044	1.294	6.952	0.778	85.724	0.871	0.165	31372	0		GO:0044449	contractile fiber part	0.00437	null	null	1.778	85.1203	0.697	0.935	5863	1		GO:0034464	BBSome	0.00022	2.592	5.984	0.477	-16.1372	0.855	0.203	34464	0
GO:0030312	external encapsulating structure	0.00051	-5.289	0.926	0.845	76.7316	0.93	0.182	30312	0		GO:0005952	cAMP-dependent protein kinase complex	0.00051	1.259	6.425	0.845	84.4941	0.87	0.167	5952	0		GO:0030018	Z disc	0.00197	null	null	1.431	56.7961	0.713	0.915	5863	1		GO:0045239	tricarboxylic acid cycle enzyme complex	0.00022	2.084	3.611	0.477	-16.6935	0.799	0.203	45239	0
GO:0005833	hemoglobin complex	0.00095	3.653	-4.053	1.114	46.3897	0.807	0.185	5833	0		GO:0031371	ubiquitin conjugating enzyme complex	0.00051	1.386	7.046	0.845	85.724	0.87	0.167	31371	0		GO:0030017	sarcomere	0.00372	null	null	1.708	80.3137	0.699	0.715	5863	1		GO:0044445	cytosolic part	0.00801	-0.236	-3.613	2.041	-17.0691	0.842	0.205	44445	0
GO:0000307	cyclin-dependent protein kinase holoenzyme complex	0.00109	2.235	-7.349	1.176	76.773	0.863	0.187	307	0		GO:0019773	proteasome core complex, alpha-subunit complex	0.00066	1.466	7.632	0.954	23.9722	0.867	0.17	19773	0		GO:0031674	I band	0.00219	null	null	1.477	66.3001	0.71	0.923	5863	1		GO:0032994	protein-lipid complex	0.00233	2.674	5.794	1.505	-56.5617	0.854	0.206	32994	0
GO:0012511	monolayer-surrounded lipid storage body	0.04444	3.908	5.32	2.785	197.348	0.79	0.206	12511	0		GO:0005795	Golgi stack	0.00299	6.401	-2.175	1.613	329.749	0.758	0.176	5795	0		GO:0034464	BBSome	0.00022	2.326	6.216	0.477	16.1372	0.855	0.203	34464	0		GO:0008537	proteasome activator complex	0.00029	3.199	6.639	0.602	-132.632	0.819	0.208	8537	0
GO:0042579	microbody	0.00415	2.587	5.063	1.756	189.717	0.838	0.214	42579	0		GO:0000139	Golgi membrane	0.01479	null	null	2.307	36.743	0.622	0.776	5795	1		GO:0045239	tricarboxylic acid cycle enzyme complex	0.00022	1.888	3.9	0.477	16.6935	0.799	0.203	45239	0		GO:0034747	Axin-APC-beta-catenin-GSK3B complex	0.00036	2.258	3.791	0.699	-15.1359	0.793	0.212	34747	0
GO:0044448	cell cortex part	0.00452	-1.976	4.773	1.792	66.7188	0.775	0.216	44448	0		GO:0030312	external encapsulating structure	0.00051	-5.072	-1.043	0.845	76.7316	0.93	0.182	30312	0		GO:0032994	protein-lipid complex	0.00233	2.391	6.062	1.505	103.383	0.854	0.206	32994	0		GO:0001533	cornified envelope	0.00036	-4.163	-0.149	0.699	-315.697	0.805	0.216	1533	0
GO:0030864	cortical actin cytoskeleton	0.00095	null	null	1.114	47.8121	0.689	0.803	44448	1		GO:0044439	peroxisomal part	0.00189	6.012	-2.102	1.415	128.355	0.781	0.186	44439	0		GO:0008537	proteasome activator complex	0.00029	2.906	6.871	0.602	132.632	0.819	0.208	8537	0		GO:0000178	exosome (RNase complex)	0.00058	2.463	5.975	0.903	-15.1669	0.82	0.221	178	0
GO:0030863	cortical cytoskeleton	0.00262	null	null	1.556	68.0146	0.713	0.875	44448	1		GO:0031903	microbody membrane	0.00182	null	null	1.398	107.382	0.706	0.868	44439	1		GO:0034747	Axin-APC-beta-catenin-GSK3B complex	0.00036	2.032	4.107	0.699	15.1359	0.793	0.212	34747	0		GO:0005853	eukaryotic translation elongation factor 1 complex	0.00058	2.599	4.132	0.903	-253.906	0.786	0.221	5853	0
GO:0031105	septin complex	0.00109	null	null	1.176	32.9667	0.665	0.812	44448	1		GO:0005778	peroxisomal membrane	0.00182	null	null	1.398	107.382	0.705	0.995	44439	1		GO:0000178	exosome (RNase complex)	0.00058	2.233	6.168	0.903	15.1669	0.82	0.221	178	0		GO:0005852	eukaryotic translation initiation factor 3 complex	0.0008	2.628	4.206	1.041	-34.6126	0.782	0.227	5852	0
GO:0043235	receptor complex	0.00816	2.478	-7.643	2.049	157.337	0.876	0.22	43235	0		GO:0005777	peroxisome	0.00415	null	null	1.756	99.2222	0.817	0.929	44439	1		GO:0005853	eukaryotic translation elongation factor 1 complex	0.00058	2.308	4.465	0.903	253.906	0.786	0.221	5853	0		GO:0000145	exocyst	0.00036	3.377	2.706	0.699	-107.281	0.778	0.23	145	0
GO:0033176	proton-transporting V-type ATPase complex	0.00175	1.416	-6.371	1.38	147.401	0.82	0.223	33176	0		GO:0044438	microbody part	0.00189	null	null	1.415	128.355	0.782	0.871	44439	1		GO:0000159	protein phosphatase type 2A complex	0.00073	2.265	6.246	1	130.664	0.812	0.225	159	0		GO:0032993	protein-DNA complex	0.00809	2.715	6.35	2.045	-12.544	0.84	0.235	32993	0
GO:0000276	mitochondrial proton-transporting ATP synthase complex, coupling factor F(o)	0.00131	null	null	1.255	42.9488	0.641	0.766	33176	1		GO:0043235	receptor complex	0.00816	1.811	8.133	2.049	78.8138	0.876	0.205	43235	0		GO:0005955	calcineurin complex	0.00022	null	null	0.477	74.2791	0.826	0.777	159	1		GO:0005829	cytosol	0.03468	-0.317	-4.283	2.678	-6.4526	0.844	0.246	5829	0
GO:0005753	mitochondrial proton-transporting ATP synthase complex	0.00342	null	null	1.672	33.0743	0.615	0.881	33176	1		GO:0005833	hemoglobin complex	0.00095	3.553	4.771	1.114	20.7692	0.807	0.211	5833	0		GO:0005852	eukaryotic translation initiation factor 3 complex	0.0008	2.334	4.56	1.041	68.1829	0.782	0.227	5852	0		GO:0008287	protein serine/threonine phosphatase complex	0.00226	2.567	6.5	1.491	-50.4996	0.831	0.251	8287	0
GO:0033178	proton-transporting two-sector ATPase complex, catalytic domain	0.00197	null	null	1.431	49.3918	0.819	0.79	33176	1		GO:0012511	monolayer-surrounded lipid storage body	0.04444	5.121	-4.442	2.785	88.0086	0.79	0.214	12511	0		GO:0000145	exocyst	0.00036	3.181	3.04	0.699	107.281	0.778	0.23	145	0		GO:0034708	methyltransferase complex	0.00248	2.621	6.633	1.531	-109.034	0.801	0.253	34708	0
GO:0031264	death-inducing signaling complex	0.00036	-3.04	-5.097	0.699	20.2718	0.811	0.233	31264	0		GO:0000307	cyclin-dependent protein kinase holoenzyme complex	0.00109	1.54	7.831	1.176	49.5918	0.863	0.214	307	0		GO:0016272	prefoldin complex	0.00095	2.953	4.597	1.114	106.439	0.756	0.231	16272	0		GO:0046930	pore complex	0.00255	2.73	6.918	1.544	-41.9892	0.817	0.254	46930	0
GO:0031526	brush border membrane	0.00051	-5.596	1.521	0.845	353.802	0.804	0.239	31526	0		GO:0030880	RNA polymerase complex	0.00153	1.524	7.532	1.322	22.9042	0.859	0.22	30880	0		GO:0022626	cytosolic ribosome	0.00299	null	null	1.613	92.9833	0.655	0.822	16272	1		GO:0015935	small ribosomal subunit	0.00466	-2.931	3.495	1.806	-112.141	0.644	0.262	15935	0
GO:0032587	ruffle membrane	0.00117	null	null	1.204	116.561	0.789	0.802	31526	1		GO:0002102	podosome	0.00029	4.563	4.231	0.602	266.884	0.746	0.23	2102	0		GO:0022627	cytosolic small ribosomal subunit	0.00291	null	null	1.602	101.436	0.636	0.748	16272	1		GO:0045263	proton-transporting ATP synthase complex, coupling factor F(o)	0.0035	2.459	6.444	1.681	-19.8201	0.777	0.262	45263	0
GO:0031461	cullin-RING ubiquitin ligase complex	0.00386	2.293	-7.247	1.724	22.1893	0.85	0.24	31461	0		GO:0030485	smooth muscle contractile fiber	0.00029	5.674	-1.533	0.602	215.888	0.791	0.23	30485	0		GO:0032993	protein-DNA complex	0.00809	2.508	6.614	2.045	103.23	0.84	0.235	32993	0		GO:0033177	proton-transporting two-sector ATPase complex, proton-transporting domain	0.00437	null	null	1.778	-0.1913	0.799	0.914	45263	1
GO:0001891	phagocytic cup	0.0008	-5.685	0.968	1.041	369.177	0.868	0.246	1891	0		GO:0031264	death-inducing signaling complex	0.00036	-2.978	5.436	0.699	20.2718	0.811	0.233	31264	0		GO:0005829	cytosol	0.03468	0.017	-4.045	2.678	88.0781	0.844	0.246	5829	0		GO:0045259	proton-transporting ATP synthase complex	0.0043	null	null	1.771	-9.3674	0.773	0.895	45263	1
GO:0000502	proteasome complex	0.00517	2.305	-6.778	1.851	46.5425	0.846	0.247	502	0		GO:0031526	brush border membrane	0.00051	-5.333	-1.871	0.845	353.802	0.804	0.239	31526	0		GO:0008287	protein serine/threonine phosphatase complex	0.00226	2.349	6.762	1.491	95.6875	0.831	0.251	8287	0		GO:0034673	inhibin-betaglycan-ActRII complex	0.00015	4.17	3.986	0.301	-99.5424	0.83	0.281	34673	0
GO:0048471	perinuclear region of cytoplasm	0.01443	3.011	4.953	2.297	113.301	0.835	0.25	48471	0		GO:0032587	ruffle membrane	0.00117	null	null	1.204	19.7787	0.789	0.802	31526	1		GO:0034708	methyltransferase complex	0.00248	2.398	6.888	1.531	186.82	0.801	0.253	34708	0		GO:0000151	ubiquitin ligase complex	0.00656	2.497	6.602	1.954	-13.5739	0.786	0.281	151	0
GO:0005773	vacuole	0.01501	3.324	5.139	2.314	149.446	0.819	0.251	5773	0		GO:0031461	cullin-RING ubiquitin ligase complex	0.00386	1.643	7.698	1.724	22.1893	0.85	0.24	31461	0		GO:0046930	pore complex	0.00255	2.494	7.187	1.544	115.088	0.817	0.254	46930	0		GO:0030870	Mre11 complex	0.00022	-2.418	6.551	0.477	-134.739	0.708	0.286	30870	0
GO:0014069	postsynaptic density	0.00109	5.61	0.796	1.176	807.206	0.765	0.252	14069	0		GO:0001891	phagocytic cup	0.0008	-5.489	-0.985	1.041	339.904	0.868	0.246	1891	0		GO:0045263	proton-transporting ATP synthase complex, coupling factor F(o)	0.0035	2.269	6.697	1.681	46.0044	0.777	0.262	45263	0		GO:0042383	sarcolemma	0.00306	4.178	-0.525	1.623	-6.7651	0.939	0.286	42383	0
GO:0008021	synaptic vesicle	0.00379	null	null	1.716	222.424	0.731	0.827	14069	1		GO:0000502	proteasome complex	0.00517	1.708	7.252	1.851	6.4881	0.846	0.247	502	0		GO:0033177	proton-transporting two-sector ATPase complex, proton-transporting domain	0.00437	null	null	1.778	40.0348	0.799	0.897	45263	1		GO:0033018	sarcoplasmic reticulum lumen	0.00015	-5.53	2.062	0.301	-296.823	0.756	0.287	33018	0
GO:0044456	synapse part	0.00984	null	null	2.13	259.266	0.975	0.737	14069	1		GO:0048471	perinuclear region of cytoplasm	0.01443	4.241	-4.244	2.297	19.2161	0.835	0.25	48471	0		GO:0045259	proton-transporting ATP synthase complex	0.0043	null	null	1.771	30.8587	0.773	0.914	45263	1		GO:0016529	sarcoplasmic reticulum	0.00211	null	null	1.462	-35.9765	0.847	0.811	33018	1
GO:0030120	vesicle coat	0.00226	null	null	1.491	85.937	0.575	0.896	14069	1		GO:0005773	vacuole	0.01501	4.514	-4.379	2.314	33.9342	0.819	0.251	5773	0		GO:0005779	integral to peroxisomal membrane	0.00058	-4.818	0.814	0.903	201.192	0.766	0.277	5779	0		GO:0030529	ribonucleoprotein complex	0.04044	2.649	6.732	2.744	-10.8772	0.779	0.289	30529	0
GO:0030136	clathrin-coated vesicle	0.00721	null	null	1.996	197.012	0.734	0.885	14069	1		GO:0016469	proton-transporting two-sector ATPase complex	0.0067	0.362	6.651	1.964	41.5907	0.822	0.254	16469	0		GO:0031231	intrinsic to peroxisomal membrane	0.00058	null	null	0.903	201.192	0.767	0.845	5779	1		GO:0019907	cyclin-dependent protein kinase activating kinase holoenzyme complex	0.00036	-2.408	6.738	0.699	-123.954	0.698	0.295	19907	0
GO:0030662	coated vesicle membrane	0.00495	null	null	1.833	86.3574	0.61	0.908	14069	1		GO:0030964	NADH dehydrogenase complex	0.00743	0.152	7.403	2.009	13.798	0.821	0.256	30964	0		GO:0034673	inhibin-betaglycan-ActRII complex	0.00015	3.917	4.269	0.301	99.5424	0.83	0.281	34673	0		GO:0035145	exon-exon junction complex	0.00029	-2.205	6.272	0.602	-46.3384	0.702	0.295	35145	0
GO:0030665	clathrin coated vesicle membrane	0.00335	null	null	1.663	136.925	0.618	0.869	14069	1		GO:0034702	ion channel complex	0.00889	0.023	6.826	2.086	47.8881	0.815	0.261	34702	0		GO:0000151	ubiquitin ligase complex	0.00656	2.364	6.84	1.954	68.1022	0.786	0.281	151	0		GO:0046581	intercellular canaliculus	0.00029	4.556	-0.759	0.602	-56.2567	0.926	0.297	46581	0
GO:0030659	cytoplasmic vesicle membrane	0.00954	null	null	2.117	74.9081	0.598	0.921	14069	1		GO:0016021	integral to membrane	0.31512	-5.087	1.119	3.636	35.8675	0.854	0.263	16021	0		GO:0030870	Mre11 complex	0.00022	-2.544	6.368	0.477	134.739	0.708	0.286	30870	0		GO:0042719	mitochondrial intermembrane space protein transporter complex	0.00044	-2.109	4.895	0.778	-207.055	0.678	0.303	42719	0
GO:0045211	postsynaptic membrane	0.00539	null	null	1.869	265.834	0.914	0.856	14069	1		GO:0031090	organelle membrane	0.08947	5.675	-0.847	3.089	38.7187	0.717	0.27	31090	0		GO:0042383	sarcolemma	0.00306	3.93	-0.271	1.623	71.1541	0.939	0.286	42383	0		GO:0005641	nuclear envelope lumen	0.00044	null	null	0.778	-62.6831	0.721	0.877	42719	1
GO:0016469	proton-transporting two-sector ATPase complex	0.0067	0.781	-6.148	1.964	74.9084	0.822	0.254	16469	0		GO:0019897	extrinsic to plasma membrane	0.00379	-5.959	-0.822	1.716	191.032	0.848	0.28	19897	0		GO:0033018	sarcoplasmic reticulum lumen	0.00015	-5.391	1.872	0.301	296.823	0.756	0.287	33018	0		GO:0005758	mitochondrial intermembrane space	0.00146	null	null	1.301	-90.749	0.709	0.877	42719	1
GO:0030964	NADH dehydrogenase complex	0.00743	0.63	-6.983	2.009	58.4395	0.821	0.256	30964	0		GO:0005834	heterotrimeric G-protein complex	0.00226	null	null	1.491	45.5084	0.763	0.87	19897	1		GO:0016529	sarcoplasmic reticulum	0.00211	null	null	1.462	68.4335	0.847	0.811	33018	1		GO:0005938	cell cortex	0.00678	3.084	-2.49	1.968	-13.8059	0.827	0.307	5938	0
GO:0034702	ion channel complex	0.00889	0.355	-6.462	2.086	150.179	0.815	0.261	34702	0		GO:0001772	immunological synapse	0.00087	-5.314	-0.987	1.079	43.6092	0.867	0.282	1772	0		GO:0030529	ribonucleoprotein complex	0.04044	2.472	7.017	2.744	69.2177	0.779	0.289	30529	0		GO:0005579	membrane attack complex	0.00044	4.254	4.541	0.778	-162.929	0.81	0.307	5579	0
GO:0016021	integral to membrane	0.31512	-4.96	-1.177	3.636	123.857	0.854	0.263	16021	0		GO:0043292	contractile fiber	0.00561	5.106	-2.566	1.886	16.1286	0.785	0.286	43292	0		GO:0001533	cornified envelope	0.00036	-4.528	0.267	0.699	315.697	0.805	0.296	1533	0		GO:0005643	nuclear pore	0.00175	null	null	1.38	-46.1253	0.63	0.846	5579	1
GO:0005794	Golgi apparatus	0.03781	3.703	4.948	2.715	107.875	0.802	0.287	5794	0		GO:0005794	Golgi apparatus	0.03781	4.835	-4.089	2.715	21.1562	0.802	0.287	5794	0		GO:0005694	chromosome	0.02805	-5.295	-0.1	2.585	135.569	0.754	0.303	5694	0		GO:0001652	granular component	0.00022	-6.706	3.572	0.477	-72.1849	0.711	0.321	1652	0
GO:0043292	contractile fiber	0.00561	4.593	3.405	1.886	92.292	0.785	0.29	43292	0		GO:0005783	endoplasmic reticulum	0.04255	4.925	-4.142	2.766	36.847	0.8	0.293	5783	0		GO:0042719	mitochondrial intermembrane space protein transporter complex	0.00044	-2.247	4.838	0.778	314.973	0.678	0.303	42719	0		GO:0016011	dystroglycan complex	0.00073	4.803	5.096	1	-75.1489	0.806	0.322	16011	0
GO:0016324	apical plasma membrane	0.00619	-6.4	0.725	1.929	288.079	0.845	0.291	16324	0		GO:0031256	leading edge membrane	0.00175	-5.993	-1.049	1.38	13.1858	0.857	0.298	31256	0		GO:0005641	nuclear envelope lumen	0.00044	null	null	0.778	62.6831	0.721	0.877	42719	1		GO:0016012	sarcoglycan complex	0.00066	null	null	0.954	-24.7097	0.808	0.927	16011	1
GO:0005783	endoplasmic reticulum	0.04255	3.792	5.016	2.766	93.8011	0.8	0.293	5783	0		GO:0009295	nucleoid	0.00204	2.879	0.004	1.447	11.0229	0.86	0.306	9295	0		GO:0005758	mitochondrial intermembrane space	0.00146	null	null	1.301	136.89	0.709	0.877	42719	1		GO:0030132	clathrin coat of coated pit	0.00073	3.102	2.585	1	-12.8125	0.739	0.322	30132	0
GO:0001772	immunological synapse	0.00087	-5.55	1.003	1.079	114.464	0.867	0.293	1772	0		GO:0005775	vacuolar lumen	0.00029	6.288	-1.608	0.602	343.546	0.773	0.322	5775	0		GO:0005938	cell cortex	0.00678	3.347	-1.909	1.968	70.2967	0.827	0.307	5938	0		GO:0005666	DNA-directed RNA polymerase III complex	0.00029	-2.952	6.876	0.602	-498.837	0.673	0.327	5666	0
GO:0044429	mitochondrial part	0.04627	6.06	3.241	2.803	101.695	0.713	0.297	44429	0		GO:0031300	intrinsic to organelle membrane	0.00823	5.186	0.359	2.053	89.851	0.693	0.332	31300	0		GO:0005579	membrane attack complex	0.00044	4.076	4.92	0.778	162.929	0.81	0.307	5579	0		GO:0030315	T-tubule	0.00087	4.688	-0.763	1.079	-34.804	0.932	0.327	30315	0
GO:0009295	nucleoid	0.00204	3.259	0.357	1.447	11.0229	0.86	0.306	9295	0		GO:0043514	interleukin-12 complex	0.00022	0.54	6.594	0.477	188.443	0.886	0.332	43514	0		GO:0005643	nuclear pore	0.00175	null	null	1.38	116.763	0.63	0.846	5579	1		GO:0016328	lateral plasma membrane	0.00095	5.069	-0.965	1.114	-10.0906	0.932	0.329	16328	0
GO:0005765	lysosomal membrane	0.00328	6.029	3.358	1.653	358.062	0.679	0.311	5765	0		GO:0016324	apical plasma membrane	0.00619	-6.287	-0.785	1.929	165.361	0.845	0.334	16324	0		GO:0001652	granular component	0.00022	-6.827	3.468	0.477	72.1849	0.711	0.321	1652	0		GO:0016010	dystrophin-associated glycoprotein complex	0.00117	4.77	5.266	1.204	-53.6778	0.806	0.336	16010	0
GO:0043202	lysosomal lumen	0.00022	null	null	0.477	343.546	0.777	0.734	5765	1		GO:0005925	focal adhesion	0.00415	-5.511	-0.676	1.756	92.6151	0.818	0.337	5925	0		GO:0016011	dystroglycan complex	0.00073	4.575	5.474	1	108.897	0.806	0.322	16011	0		GO:0034366	spherical high-density lipoprotein particle	0.00058	3.537	4.436	0.903	-174.72	0.8	0.343	34366	0
GO:0000323	lytic vacuole	0.01297	null	null	2.25	158.054	0.786	0.952	5765	1		GO:0070161	anchoring junction	0.00678	null	null	1.968	49.6688	0.817	0.708	5925	1		GO:0016012	sarcoglycan complex	0.00066	null	null	0.954	66.8953	0.808	0.927	16011	1		GO:0034385	triglyceride-rich lipoprotein particle	0.00109	null	null	1.176	-84.8445	0.792	0.929	34366	1
GO:0000421	autophagic vacuole membrane	0.00044	null	null	0.778	133.768	0.722	0.776	5765	1		GO:0005912	adherens junction	0.00619	null	null	1.929	50.1466	0.814	0.939	5925	1		GO:0005666	DNA-directed RNA polymerase III complex	0.00029	-3.066	6.728	0.602	498.837	0.673	0.327	5666	0		GO:0034358	plasma lipoprotein particle	0.00233	null	null	1.505	-56.5617	0.781	0.987	34366	1
GO:0005775	vacuolar lumen	0.00029	null	null	0.602	343.546	0.773	0.75	5765	1		GO:0005911	cell-cell junction	0.00925	null	null	2.104	2.0947	0.812	0.767	5925	1		GO:0030315	T-tubule	0.00087	4.511	-0.529	1.079	34.804	0.932	0.327	30315	0		GO:0034363	intermediate-density lipoprotein particle	0.00044	null	null	0.778	-119.921	0.803	0.797	34366	1
GO:0005774	vacuolar membrane	0.00525	null	null	1.857	153.167	0.667	0.947	5765	1		GO:0005924	cell-substrate adherens junction	0.0043	null	null	1.771	92.1986	0.818	0.986	5925	1		GO:0016328	lateral plasma membrane	0.00095	4.93	-0.727	1.114	10.0906	0.932	0.329	16328	0		GO:0034364	high-density lipoprotein particle	0.00204	null	null	1.447	-92.8876	0.783	0.908	34366	1
GO:0030897	HOPS complex	0.00044	null	null	0.778	170.228	0.684	0.776	5765	1		GO:0030057	desmosome	0.0008	null	null	1.041	42.1593	0.836	0.787	5925	1		GO:0000932	cytoplasmic mRNA processing body	0.00095	-1.499	3.328	1.114	127.6	0.703	0.33	932	0		GO:0034361	very-low-density lipoprotein particle	0.00109	null	null	1.176	-84.8445	0.791	0.936	34366	1
GO:0005764	lysosome	0.01297	null	null	2.25	158.054	0.786	0.865	5765	1		GO:0030055	cell-substrate junction	0.00444	null	null	1.785	87.8082	0.821	0.845	5925	1		GO:0016010	dystrophin-associated glycoprotein complex	0.00117	4.536	5.644	1.204	77.7838	0.806	0.336	16010	0		GO:0034362	low-density lipoprotein particle	0.00066	null	null	0.954	-78.1107	0.798	0.836	34366	1
GO:0044437	vacuolar part	0.00539	null	null	1.869	256.449	0.752	0.756	5765	1		GO:0016327	apicolateral plasma membrane	0.00437	-6.126	-0.85	1.778	13.1344	0.85	0.338	16327	0		GO:0016585	chromatin remodeling complex	0.00335	-2.318	6.557	1.663	185.985	0.65	0.343	16585	0		GO:0042627	chylomicron	0.0008	null	null	1.041	-120.472	0.796	0.83	34366	1
GO:0033180	proton-transporting V-type ATPase, V1 domain	0.0008	null	null	1.041	105.281	0.828	0.883	5765	1		GO:0005739	mitochondrion	0.10069	5.663	-4.513	3.141	19.7557	0.781	0.339	5739	0		GO:0035145	exon-exon junction complex	0.00029	-2.341	6.093	0.602	46.3384	0.702	0.343	35145	0		GO:0016585	chromatin remodeling complex	0.00335	-2.17	6.62	1.663	-117.68	0.65	0.348	16585	0
GO:0016471	vacuolar proton-transporting V-type ATPase complex	0.00073	null	null	1	289.96	0.658	0.807	5765	1		GO:0009898	internal side of plasma membrane	0.00532	-5.545	-0.658	1.863	27.7174	0.847	0.345	9898	0		GO:0019907	cyclin-dependent protein kinase activating kinase holoenzyme complex	0.00036	-2.551	6.577	0.699	123.954	0.698	0.348	19907	0		GO:0042405	nuclear inclusion body	0.00036	-6.069	3.88	0.699	-104.703	0.761	0.348	42405	0
GO:0031256	leading edge membrane	0.00175	-6.112	1.01	1.38	77.7077	0.857	0.311	31256	0		GO:0031519	PcG protein complex	0.00124	4.319	5.129	1.23	150.125	0.762	0.347	31519	0		GO:0042405	nuclear inclusion body	0.00036	-6.119	3.469	0.699	104.703	0.761	0.348	42405	0		GO:0005901	caveola	0.00175	4.432	-0.517	1.38	-25.0494	0.929	0.349	5901	0
GO:0043514	interleukin-12 complex	0.00022	1.207	-6.3	0.477	429.495	0.886	0.332	43514	0		GO:0005744	mitochondrial inner membrane presequence translocase complex	0.00044	5.865	3.355	0.778	38.2219	0.68	0.351	5744	0		GO:0005901	caveola	0.00175	4.188	-0.26	1.38	103.572	0.929	0.349	5901	0		GO:0008180	signalosome	0.00044	-2.401	6.793	0.778	-36.8692	0.695	0.353	8180	0
GO:0005923	tight junction	0.00372	-5.656	0.794	1.708	161.18	0.819	0.333	5923	0		GO:0070652	HAUS complex	0.00036	5.098	4.726	0.699	97.2302	0.746	0.37	70652	0		GO:0005913	cell-cell adherens junction	0.00175	4.323	-0.376	1.38	57.1921	0.918	0.349	5913	0		GO:0005947	mitochondrial alpha-ketoglutarate dehydrogenase complex	0.00015	-1.924	4.58	0.301	-25.0403	0.698	0.354	5947	0
GO:0070160	occluding junction	0.00372	null	null	1.708	161.18	0.82	0.829	5923	1		GO:0005871	kinesin complex	0.00044	null	null	0.778	39.9035	0.743	0.71	70652	1		GO:0005916	fascia adherens	0.00058	null	null	0.903	10.0906	0.92	0.732	5913	1		GO:0045240	dihydrolipoyl dehydrogenase complex	0.00015	null	null	0.301	-25.0403	0.791	0.954	5947	1
GO:0005922	connexon complex	0.00153	null	null	1.322	19.5172	0.764	0.768	5923	1		GO:0030286	dynein complex	0.0016	null	null	1.342	3.7589	0.72	0.784	70652	1		GO:0014704	intercalated disc	0.00087	null	null	1.079	7.5679	0.919	0.971	5913	1		GO:0030062	mitochondrial tricarboxylic acid cycle enzyme complex	0.00015	null	null	0.301	-25.0403	0.698	0.954	5947	1
GO:0005921	gap junction	0.00182	null	null	1.398	19.0481	0.83	0.78	5923	1		GO:0005577	fibrinogen complex	0.00058	0.806	6.537	0.903	46.7025	0.879	0.378	5577	0		GO:0005584	collagen type I	0.00036	1.284	-1.909	0.699	176.484	0.929	0.351	5584	0		GO:0005876	spindle microtubule	0.00182	-3.013	5.431	1.398	-99.0883	0.645	0.363	5876	0
GO:0043296	apical junction complex	0.0043	null	null	1.771	115.673	0.817	0.979	5923	1		GO:0005665	DNA-directed RNA polymerase II, core complex	0.00102	4.846	5.344	1.146	154.18	0.736	0.384	5665	0		GO:0008180	signalosome	0.00044	-2.546	6.639	0.778	36.8692	0.695	0.353	8180	0		GO:0000922	spindle pole	0.00335	null	null	1.663	-4.7252	0.7	0.801	5876	1
GO:0019897	extrinsic to plasma membrane	0.00379	-6.082	0.841	1.716	221.423	0.848	0.334	19897	0		GO:0005736	DNA-directed RNA polymerase I complex	0.00022	null	null	0.477	24.0745	0.742	0.845	5665	1		GO:0005947	mitochondrial alpha-ketoglutarate dehydrogenase complex	0.00015	-2.057	4.519	0.301	25.0403	0.698	0.354	5947	0		GO:0005680	anaphase-promoting complex	0.00131	-2.37	7.018	1.255	-24.7536	0.669	0.384	5680	0
GO:0005834	heterotrimeric G-protein complex	0.00226	null	null	1.491	81.4485	0.763	0.87	19897	1		GO:0055029	nuclear DNA-directed RNA polymerase complex	0.00153	null	null	1.322	22.9042	0.746	0.968	5665	1		GO:0045240	dihydrolipoyl dehydrogenase complex	0.00015	null	null	0.301	25.0403	0.791	0.954	5947	1		GO:0000152	nuclear ubiquitin ligase complex	0.0016	null	null	1.342	-24.7536	0.665	0.764	5680	1
GO:0016327	apicolateral plasma membrane	0.00437	-6.237	0.781	1.778	115.673	0.85	0.338	16327	0		GO:0000428	DNA-directed RNA polymerase complex	0.00153	null	null	1.322	22.9042	0.844	0.998	5665	1		GO:0030062	mitochondrial tricarboxylic acid cycle enzyme complex	0.00015	null	null	0.301	25.0403	0.698	0.954	5947	1		GO:0005694	chromosome	0.02805	-4.877	-0.571	2.585	-27.3849	0.754	0.389	5694	0
GO:0005739	mitochondrion	0.10069	4.41	5.495	3.141	94.5819	0.781	0.342	5739	0		GO:0005786	signal recognition particle, endoplasmic reticulum targeting	0.00036	3.22	3.016	0.699	44.403	0.82	0.397	5786	0		GO:0030132	clathrin coat of coated pit	0.00073	2.979	2.958	1	12.8125	0.739	0.356	30132	0		GO:0016363	nuclear matrix	0.0027	-6.758	4.161	1.568	-92.6115	0.703	0.408	16363	0
GO:0009898	internal side of plasma membrane	0.00532	-5.736	0.723	1.863	115.615	0.847	0.345	9898	0		GO:0030054	cell junction	0.02244	-5.469	-0.341	2.489	78.7195	0.826	0.4	30054	0		GO:0005881	cytoplasmic microtubule	0.0008	-2.716	3.873	1.041	174.726	0.656	0.357	5881	0		GO:0005652	nuclear lamina	0.00051	null	null	0.845	-31.7114	0.734	0.852	16363	1
GO:0031519	PcG protein complex	0.00124	4.877	-4.17	1.23	384.044	0.762	0.347	31519	0		GO:0005791	rough endoplasmic reticulum	0.00138	3.549	-3.448	1.279	132.721	0.825	0.403	5791	0		GO:0005680	anaphase-promoting complex	0.00131	-2.53	6.968	1.255	24.7536	0.669	0.384	5680	0		GO:0005742	mitochondrial outer membrane translocase complex	0.00051	-1.425	4.359	0.845	-101.404	0.713	0.412	5742	0
GO:0055029	nuclear DNA-directed RNA polymerase complex	0.00153	5.336	-4.677	1.322	189.183	0.746	0.36	55029	0		GO:0015629	actin cytoskeleton	0.0126	3.154	0.012	2.238	33.1517	0.819	0.42	15629	0		GO:0000152	nuclear ubiquitin ligase complex	0.0016	null	null	1.342	24.7536	0.665	0.764	5680	1		GO:0008290	F-actin capping protein complex	0.00036	-2.914	4.882	0.699	-96.5142	0.686	0.418	8290	0
GO:0005736	DNA-directed RNA polymerase I complex	0.00022	null	null	0.477	24.0745	0.742	0.868	55029	1		GO:0016323	basolateral plasma membrane	0.00954	-6.301	-0.699	2.117	3.3371	0.839	0.421	16323	0		GO:0016363	nuclear matrix	0.0027	-6.87	3.742	1.568	119.908	0.703	0.408	16363	0		GO:0031970	organelle envelope lumen	0.00189	-6.713	3.724	1.415	-80.5624	0.733	0.421	31970	0
GO:0005665	DNA-directed RNA polymerase II, core complex	0.00102	null	null	1.146	154.18	0.736	0.968	55029	1		GO:0005790	smooth endoplasmic reticulum	0.00058	3.097	-3.232	0.903	48.4199	0.836	0.431	5790	0		GO:0005652	nuclear lamina	0.00051	null	null	0.845	31.7114	0.734	0.852	16363	1		GO:0001931	uropod	0.00029	1.526	-3.946	0.602	-88.2229	0.944	0.425	1931	0
GO:0000428	DNA-directed RNA polymerase complex	0.00153	null	null	1.322	189.183	0.844	0.998	55029	1		GO:0031616	spindle pole centrosome	0.00036	5.678	-1.262	0.699	72.6157	0.772	0.435	31616	0		GO:0031970	organelle envelope lumen	0.00189	-6.777	3.384	1.415	113.886	0.733	0.416	31970	0		GO:0032039	integrator complex	0.00051	-2.633	6.547	0.845	-419.707	0.657	0.426	32039	0
GO:0005778	peroxisomal membrane	0.00182	5.976	3.256	1.398	259.12	0.705	0.365	5778	0		GO:0005784	Sec61 translocon complex	0.00015	4.635	2.877	0.301	295.802	0.696	0.436	5784	0		GO:0005742	mitochondrial outer membrane translocase complex	0.00051	-1.562	4.457	0.845	101.404	0.713	0.421	5742	0		GO:0005675	holo TFIIH complex	0.00051	null	null	0.845	-74.0385	0.657	0.716	32039	1
GO:0031903	microbody membrane	0.00182	null	null	1.398	259.12	0.706	0.868	5778	1		GO:0030867	rough endoplasmic reticulum membrane	0.00066	null	null	0.954	254.873	0.693	0.813	5784	1		GO:0032039	integrator complex	0.00051	-2.762	6.433	0.845	419.707	0.657	0.426	32039	0		GO:0005669	transcription factor TFIID complex	0.00146	null	null	1.301	-33.0802	0.633	0.769	32039	1
GO:0005777	peroxisome	0.00415	null	null	1.756	189.717	0.817	0.929	5778	1		GO:0005787	signal peptidase complex	0.00022	4.763	2.894	0.477	153.855	0.69	0.446	5787	0		GO:0005675	holo TFIIH complex	0.00051	null	null	0.845	74.0385	0.657	0.716	32039	1		GO:0005637	nuclear inner membrane	0.00095	-6.743	3.975	1.114	-40.9914	0.705	0.44	5637	0
GO:0044438	microbody part	0.00189	null	null	1.415	268.42	0.782	0.868	5778	1		GO:0000313	organellar ribosome	0.00204	6.37	1.987	1.447	8.5794	0.727	0.447	313	0		GO:0005669	transcription factor TFIID complex	0.00146	null	null	1.301	33.0802	0.633	0.769	32039	1		GO:0035267	NuA4 histone acetyltransferase complex	0.00051	-2.583	6.506	0.845	-104.837	0.659	0.442	35267	0
GO:0044439	peroxisomal part	0.00189	null	null	1.415	268.42	0.781	0.995	5778	1		GO:0031362	anchored to external side of plasma membrane	0.00015	-5.658	-0.818	0.301	188.88	0.867	0.46	31362	0		GO:0016442	RNA-induced silencing complex	0.00066	1.901	5.27	0.954	12.0781	0.819	0.431	16442	0		GO:0043189	H4/H2A histone acetyltransferase complex	0.00058	null	null	0.903	-104.837	0.656	0.789	35267	1
GO:0009897	external side of plasma membrane	0.01115	-5.828	0.566	2.185	179.661	0.833	0.371	9897	0		GO:0046658	anchored to plasma membrane	0.00102	null	null	1.146	92.5191	0.851	0.725	31362	1		GO:0031332	RNAi effector complex	0.00066	2.577	5.864	0.954	12.0781	0.819	0.431	31332	0		GO:0010369	chromocenter	0.00029	-6.438	1.941	0.602	-366.061	0.738	0.443	10369	0
GO:0005577	fibrinogen complex	0.00058	1.438	-6.2	0.903	46.7025	0.879	0.378	5577	0		GO:0032156	septin cytoskeleton	0.00109	2.91	0.095	1.176	24.1132	0.85	0.461	32156	0		GO:0030684	preribosome	0.0008	1.982	5.443	1.041	63.358	0.817	0.437	30684	0		GO:0034399	nuclear periphery	0.00313	-7.004	4.248	1.633	-82.6468	0.703	0.455	34399	0
GO:0016323	basolateral plasma membrane	0.00954	-6.394	0.609	2.117	149.438	0.839	0.389	16323	0		GO:0031226	intrinsic to plasma membrane	0.02237	-6.187	-0.079	2.487	17.3799	0.822	0.468	31226	0		GO:0005637	nuclear inner membrane	0.00095	-6.821	3.629	1.114	40.9914	0.705	0.44	5637	0		GO:0031012	extracellular matrix	0.02259	0.962	-0.949	2.491	-4.7656	0.923	0.47	31012	0
GO:0005791	rough endoplasmic reticulum	0.00138	2.726	4.163	1.279	148.925	0.825	0.403	5791	0		GO:0005640	nuclear outer membrane	0.00051	5.876	0.64	0.845	248.747	0.692	0.469	5640	0		GO:0035267	NuA4 histone acetyltransferase complex	0.00051	-2.698	6.34	0.845	178.596	0.659	0.442	35267	0		GO:0000118	histone deacetylase complex	0.00146	-2.456	6.495	1.301	-176.521	0.636	0.475	118	0
GO:0005859	muscle myosin complex	0.00036	6.02	-1.913	0.699	489.089	0.718	0.403	5859	0		GO:0005741	mitochondrial outer membrane	0.00459	null	null	1.799	57.5915	0.666	0.974	5640	1		GO:0043189	H4/H2A histone acetyltransferase complex	0.00058	null	null	0.903	178.596	0.656	0.789	35267	1		GO:0070822	Sin3-type complex	0.00036	null	null	0.699	-150.173	0.582	0.824	118	1
GO:0030016	myofibril	0.00495	null	null	1.833	88.5327	0.777	0.779	5859	1		GO:0031968	organelle outer membrane	0.0051	null	null	1.845	76.7269	0.697	0.808	5640	1		GO:0010369	chromocenter	0.00029	-6.692	2.01	0.602	366.061	0.738	0.443	10369	0		GO:0016581	NuRD complex	0.00095	null	null	1.114	-72.7031	0.639	0.877	118	1
GO:0016460	myosin II complex	0.00044	null	null	0.778	366.817	0.739	0.715	5859	1		GO:0031965	nuclear membrane	0.00466	null	null	1.806	7.0268	0.665	0.707	5640	1		GO:0001931	uropod	0.00029	1.367	-4.016	0.602	88.2229	0.944	0.444	1931	0		GO:0016580	Sin3 complex	0.00036	null	null	0.699	-150.173	0.582	0.786	118	1
GO:0031616	spindle pole centrosome	0.00036	5.514	2.278	0.699	231.59	0.772	0.403	31616	0		GO:0031262	Ndc80 complex	0.00022	4.869	4.562	0.477	155.649	0.77	0.469	31262	0		GO:0031528	microvillus membrane	0.00036	4.198	-2.334	0.699	15.1359	0.889	0.45	31528	0		GO:0032133	chromosome passenger complex	0.00029	-2.895	4.743	0.602	-97.9453	0.688	0.476	32133	0
GO:0031090	organelle membrane	0.08947	5.336	1.978	3.089	102.966	0.717	0.404	31090	0		GO:0042175	nuclear outer membrane-endoplasmic reticulum membrane network	0.02164	-2.687	0.9	2.473	84.9775	0.81	0.489	42175	0		GO:0032133	chromosome passenger complex	0.00029	-3.112	4.944	0.602	97.9453	0.688	0.451	32133	0		GO:0016442	RNA-induced silencing complex	0.00066	2.086	5.051	0.954	-12.0781	0.819	0.485	16442	0
GO:0031300	intrinsic to organelle membrane	0.00823	4.737	1.022	2.053	175.987	0.693	0.418	31300	0		GO:0005788	endoplasmic reticulum lumen	0.00291	null	null	1.602	11.8805	0.739	0.75	42175	1		GO:0034399	nuclear periphery	0.00313	-7.136	3.831	1.633	105.633	0.703	0.455	34399	0		GO:0031332	RNAi effector complex	0.00066	2.813	5.633	0.954	-12.0781	0.819	0.485	31332	0
GO:0005762	mitochondrial large ribosomal subunit	0.00117	6.319	-0.777	1.204	107.03	0.687	0.42	5762	0		GO:0005789	endoplasmic reticulum membrane	0.02142	null	null	2.468	76.2417	0.601	0.726	42175	1		GO:0000803	sex chromosome	0.00109	-5.082	-0.074	1.176	144.254	0.767	0.464	803	0		GO:0008023	transcription elongation factor complex	0.0008	-2.857	7.111	1.041	-29.8531	0.652	0.491	8023	0
GO:0000315	organellar large ribosomal subunit	0.00117	null	null	1.204	107.03	0.731	0.915	5762	1		GO:0044432	endoplasmic reticulum part	0.02419	null	null	2.521	57.7874	0.724	0.799	42175	1		GO:0045335	phagocytic vesicle	0.00211	-0.529	-4.758	1.462	150.532	0.812	0.464	45335	0		GO:0030684	preribosome	0.0008	2.172	5.216	1.041	-63.358	0.817	0.493	30684	0
GO:0005761	mitochondrial ribosome	0.00204	null	null	1.447	76.6453	0.674	0.955	5762	1		GO:0008250	oligosaccharyltransferase complex	0.00044	4.84	2.795	0.778	7.9401	0.677	0.49	8250	0		GO:0030670	phagocytic vesicle membrane	0.00066	null	null	0.954	35.0466	0.735	0.804	45335	1		GO:0005863	striated muscle myosin thick filament	7e-05	-2.931	3.569	0	-79.0561	0.69	0.495	5863	0
GO:0030054	cell junction	0.02244	-5.578	0.369	2.489	152.954	0.826	0.429	30054	0		GO:0005903	brush border	0.00153	-1.772	-2.016	1.322	101.086	0.92	0.492	5903	0		GO:0030666	endocytic vesicle membrane	0.00168	null	null	1.362	35.0466	0.717	0.865	45335	1		GO:0044449	contractile fiber part	0.00437	null	null	1.778	-1.6214	0.697	0.935	5863	1
GO:0048500	signal recognition particle	0.00051	3.386	-2.487	0.845	44.403	0.816	0.429	48500	0		GO:0005886	plasma membrane	0.18463	-5.489	-0.732	3.404	15.6778	0.825	0.494	5886	0		GO:0000118	histone deacetylase complex	0.00146	-2.575	6.382	1.301	278.977	0.636	0.475	118	0		GO:0030018	Z disc	0.00197	null	null	1.431	-14.293	0.713	0.902	5863	1
GO:0005790	smooth endoplasmic reticulum	0.00058	2.421	3.887	0.903	48.4199	0.836	0.431	5790	0		GO:0044459	plasma membrane part	0.12962	null	null	3.25	7.6557	0.813	0.725	5886	1		GO:0070822	Sin3-type complex	0.00036	null	null	0.699	150.173	0.582	0.877	118	1		GO:0030017	sarcomere	0.00372	null	null	1.708	-14.3136	0.699	0.923	5863	1
GO:0070652	HAUS complex	0.00036	5.58	-3.711	0.699	97.2302	0.746	0.435	70652	0		GO:0033017	sarcoplasmic reticulum membrane	0.00051	5.43	-1.678	0.845	39.5916	0.701	0.495	33017	0		GO:0016581	NuRD complex	0.00095	null	null	1.114	209.312	0.639	0.842	118	1		GO:0031674	I band	0.00219	null	null	1.477	-27.8449	0.71	0.712	5863	1
GO:0005871	kinesin complex	0.00044	null	null	0.778	39.9035	0.743	0.71	70652	1		GO:0005615	extracellular space	0.04335	-0.96	1.761	2.775	52.5812	0.963	0.499	5615	0		GO:0016580	Sin3 complex	0.00036	null	null	0.699	150.173	0.582	0.877	118	1		GO:0044452	nucleolar part	0.00117	-6.742	3.513	1.204	-16.0199	0.678	0.497	44452	0
GO:0030286	dynein complex	0.0016	null	null	1.342	38.4341	0.72	0.784	70652	1		GO:0015030	Cajal body	0.00175	6.729	0.233	1.38	7.9427	0.786	0.506	15030	0		GO:0005814	centriole	0.00095	-6.149	0.997	1.114	155.06	0.699	0.488	5814	0		GO:0000932	cytoplasmic mRNA processing body	0.00095	-1.156	2.896	1.114	-30.7522	0.703	0.499	932	0
GO:0005784	Sec61 translocon complex	0.00015	4.958	-1.71	0.301	295.802	0.696	0.436	5784	0		GO:0031224	intrinsic to membrane	0.32087	-4.99	0.923	3.644	34.3787	0.861	0.512	31224	0		GO:0034451	centriolar satellite	0.00073	null	null	1	57.2061	0.704	0.857	5814	1		GO:0005689	U12-type spliceosomal complex	0.00109	-3.375	6.716	1.176	-52.3561	0.669	0.505	5689	0
GO:0030867	rough endoplasmic reticulum membrane	0.00066	null	null	0.954	254.873	0.693	0.813	5784	1		GO:0031233	intrinsic to external side of plasma membrane	0.00022	-5.878	-0.886	0.477	94.4399	0.865	0.515	31233	0		GO:0000242	pericentriolar material	0.00036	null	null	0.699	8.0686	0.717	0.817	5814	1		GO:0042583	chromaffin granule	0.00095	-0.713	-5.055	1.114	-40.5903	0.822	0.516	42583	0
GO:0005787	signal peptidase complex	0.00022	5.065	-1.72	0.477	153.855	0.69	0.446	5787	0		GO:0005751	mitochondrial respiratory chain complex IV	0.00029	5.334	3.294	0.602	17.0473	0.683	0.529	5751	0		GO:0008023	transcription elongation factor complex	0.0008	-2.995	7.032	1.041	225.13	0.652	0.491	8023	0		GO:0005814	centriole	0.00095	-6.166	0.721	1.114	-67.3982	0.699	0.519	5814	0
GO:0015629	actin cytoskeleton	0.0126	3.555	0.375	2.238	102.55	0.819	0.461	15629	0		GO:0005746	mitochondrial respiratory chain	0.00867	null	null	2.076	14.811	0.626	0.87	5751	1		GO:0000808	origin recognition complex	0.00066	-3.501	5.343	0.954	12.209	0.661	0.491	808	0		GO:0034451	centriolar satellite	0.00073	null	null	1	-9.9546	0.704	0.857	5814	1
GO:0032156	septin cytoskeleton	0.00109	3.301	0.25	1.176	32.9667	0.85	0.461	32156	0		GO:0005747	mitochondrial respiratory chain complex I	0.00743	null	null	2.009	13.798	0.599	0.722	5751	1		GO:0044452	nucleolar part	0.00117	-6.876	3.416	1.204	50.0602	0.678	0.497	44452	0		GO:0000242	pericentriolar material	0.00036	null	null	0.699	-8.0686	0.717	0.817	5814	1
GO:0031226	intrinsic to plasma membrane	0.02237	-6.243	-0.062	2.487	136.124	0.822	0.468	31226	0		GO:0045271	respiratory chain complex I	0.00743	null	null	2.009	13.798	0.806	0.993	5751	1		GO:0015935	small ribosomal subunit	0.00466	-3.071	3.755	1.806	122.112	0.644	0.499	15935	0		GO:0000791	euchromatin	0.00044	-6.975	2.001	0.778	-383.671	0.726	0.521	791	0
GO:0005640	nuclear outer membrane	0.00051	5.875	0.654	0.845	321.64	0.692	0.469	5640	0		GO:0009434	microtubule-based flagellum	0.00138	-1.527	-2.103	1.279	66.2458	0.842	0.529	9434	0		GO:0005689	U12-type spliceosomal complex	0.00109	-3.637	6.509	1.176	52.3561	0.669	0.505	5689	0		GO:0005657	replication fork	0.00226	-7.049	2.308	1.491	-52.6815	0.699	0.522	5657	0
GO:0005741	mitochondrial outer membrane	0.00459	null	null	1.799	150.533	0.666	0.974	5640	1		GO:0005605	basal lamina	0.00066	-0.943	1.732	0.954	189.685	0.962	0.536	5605	0		GO:0000791	euchromatin	0.00044	-7.135	2.027	0.778	425.66	0.726	0.521	791	0		GO:0030424	axon	0.00612	1.41	-3.884	1.924	-40.6486	0.933	0.522	30424	0
GO:0031968	organelle outer membrane	0.0051	null	null	1.845	166.688	0.697	0.808	5640	1		GO:0005604	basement membrane	0.00437	null	null	1.778	18.3265	0.96	0.708	5605	1		GO:0001726	ruffle	0.00321	0.652	-2.819	1.643	140.287	0.934	0.524	1726	0		GO:0015630	microtubule cytoskeleton	0.02893	-4.446	-0.051	2.599	-40.9678	0.727	0.524	15630	0
GO:0031965	nuclear membrane	0.00466	null	null	1.806	128.78	0.665	0.707	5640	1		GO:0005740	mitochondrial envelope	0.03774	7.36	-2.255	2.714	35.1191	0.683	0.536	5740	0		GO:0030027	lamellipodium	0.00313	null	null	1.633	45.4376	0.934	0.866	1726	1		GO:0044430	cytoskeletal part	0.04466	null	null	2.787	-10.3328	0.649	0.776	15630	1
GO:0031262	Ndc80 complex	0.00022	5.395	-3.551	0.477	155.649	0.77	0.469	31262	0		GO:0005743	mitochondrial inner membrane	0.03031	null	null	2.619	30.1367	0.61	0.866	5740	1		GO:0030008	TRAPP complex	0.00015	-1.035	3.675	0.301	11.5853	0.751	0.525	30008	0		GO:0030008	TRAPP complex	0.00015	-0.886	3.602	0.301	-11.5853	0.751	0.525	30008	0
GO:0005635	nuclear envelope	0.00984	6.733	1.181	2.13	163.203	0.684	0.477	5635	0		GO:0005635	nuclear envelope	0.00984	null	null	2.13	11.3	0.684	0.737	5740	1		GO:0035097	histone methyltransferase complex	0.00248	-2.533	6.407	1.531	186.82	0.624	0.535	35097	0		GO:0031528	microvillus membrane	0.00036	4.251	-2.48	0.699	-15.1359	0.889	0.531	31528	0
GO:0005743	mitochondrial inner membrane	0.03031	null	null	2.619	84.5827	0.61	0.886	5635	1		GO:0031967	organelle envelope	0.04707	null	null	2.81	30.2264	0.717	0.917	5740	1		GO:0042611	MHC protein complex	0.06062	3.735	6.217	2.92	510.852	0.736	0.536	42611	0		GO:0035097	histone methyltransferase complex	0.00248	-2.41	6.498	1.531	-109.034	0.624	0.535	35097	0
GO:0005740	mitochondrial envelope	0.03774	null	null	2.714	99.5398	0.683	0.917	5635	1		GO:0031966	mitochondrial membrane	0.03665	null	null	2.702	26.264	0.605	0.927	5740	1		GO:0005657	replication fork	0.00226	-7.209	2.327	1.491	102.041	0.699	0.538	5657	0		GO:0042611	MHC protein complex	0.06062	3.983	5.871	2.92	-478.13	0.736	0.536	42611	0
GO:0031967	organelle envelope	0.04707	null	null	2.81	114.05	0.717	0.756	5635	1		GO:0019866	organelle inner membrane	0.03118	null	null	2.631	28.4597	0.65	0.864	5740	1		GO:0005884	actin filament	0.00168	-2.913	5.298	1.362	107.223	0.653	0.543	5884	0		GO:0000808	origin recognition complex	0.00066	-3.164	5.215	0.954	-12.209	0.661	0.538	808	0
GO:0031966	mitochondrial membrane	0.03665	null	null	2.702	92.7627	0.605	0.927	5635	1		GO:0005759	mitochondrial matrix	0.01035	null	null	2.152	15.1721	0.711	0.747	5740	1		GO:0016592	mediator complex	0.00182	-2.629	6.514	1.398	35.6606	0.632	0.545	16592	0		GO:0000803	sex chromosome	0.00109	-4.679	-0.485	1.176	-12.0538	0.767	0.538	803	0
GO:0019866	organelle inner membrane	0.03118	null	null	2.631	83.2721	0.65	0.89	5635	1		GO:0044455	mitochondrial membrane part	0.01413	null	null	2.288	10.6444	0.625	0.778	5740	1		GO:0016605	PML body	0.00204	-6.484	3.725	1.447	75.5947	0.695	0.55	16605	0		GO:0016592	mediator complex	0.00182	-2.499	6.619	1.398	-9.138	0.632	0.545	16592	0
GO:0044455	mitochondrial membrane part	0.01413	null	null	2.288	42.2075	0.625	0.794	5635	1		GO:0000781	chromosome, telomeric region	0.00153	6.493	-0.01	1.322	551.359	0.785	0.537	781	0		GO:0016607	nuclear speck	0.00459	null	null	1.799	57.4804	0.677	0.81	16605	1		GO:0016605	PML body	0.00204	-6.39	4.121	1.447	-44.9517	0.695	0.55	16605	0
GO:0008250	oligosaccharyltransferase complex	0.00044	5.113	-1.628	0.778	7.9401	0.677	0.49	8250	0		GO:0005681	spliceosomal complex	0.00612	5.689	4.679	1.924	5.6574	0.729	0.545	5681	0		GO:0044445	cytosolic part	0.00801	0.359	-3.283	2.041	60.1755	0.842	0.551	44445	0		GO:0016607	nuclear speck	0.00459	null	null	1.799	-20.1758	0.677	0.81	16605	1
GO:0030125	clathrin vesicle coat	0.0008	5.055	-1.36	1.041	192.853	0.602	0.492	30125	0		GO:0005905	coated pit	0.00204	0.29	0.569	1.447	28.6019	0.844	0.556	5905	0		GO:0001527	microfibril	0.00029	1.269	-1.942	0.602	62.2988	0.93	0.563	1527	0		GO:0001527	microfibril	0.00029	0.919	-0.998	0.602	-20.6112	0.93	0.563	1527	0
GO:0012510	trans-Golgi network transport vesicle membrane	0.00044	null	null	0.778	185.704	0.65	0.872	30125	1		GO:0042622	photoreceptor outer segment membrane	0.00022	3.122	-1.244	0.477	256.623	0.761	0.559	42622	0		GO:0030175	filopodium	0.00146	0.852	-3.269	1.301	19.8862	0.939	0.563	30175	0		GO:0008076	voltage-gated potassium channel complex	0.00342	4.232	5.284	1.672	-76.8983	0.778	0.565	8076	0
GO:0030118	clathrin coat	0.00233	null	null	1.505	121.831	0.735	0.839	30125	1		GO:0035253	ciliary rootlet	0.00066	null	null	0.954	58.2424	0.718	0.767	42622	1		GO:0008076	voltage-gated potassium channel complex	0.00342	3.998	5.626	1.672	99.83	0.778	0.565	8076	0		GO:0034703	cation channel complex	0.0067	null	null	1.964	-39.035	0.793	0.876	8076	1
GO:0030117	membrane coat	0.00525	null	null	1.857	82.2961	0.718	0.923	30125	1		GO:0001750	photoreceptor outer segment	0.00138	null	null	1.279	62.8119	0.914	0.824	42622	1		GO:0034703	cation channel complex	0.0067	null	null	1.964	88.7337	0.793	0.876	8076	1		GO:0034705	potassium channel complex	0.00342	null	null	1.672	-76.8983	0.802	0.876	8076	1
GO:0030119	AP-type membrane coat adaptor complex	0.00168	null	null	1.362	140.062	0.741	0.773	30125	1		GO:0031941	filamentous actin	0.00073	4.976	4.539	1	95.0358	0.731	0.562	31941	0		GO:0034705	potassium channel complex	0.00342	null	null	1.672	99.83	0.802	0.876	8076	1		GO:0030139	endocytic vesicle	0.0043	-0.82	-3.994	1.771	-43.3208	0.807	0.584	30139	0
GO:0030126	COPI vesicle coat	0.00095	null	null	1.114	42.5555	0.583	0.881	30125	1		GO:0019717	synaptosome	0.00233	-1.57	-1.199	1.505	32.0283	0.966	0.567	19717	0		GO:0005902	microvillus	0.00153	0.651	-2.84	1.322	25.1628	0.939	0.566	5902	0		GO:0030175	filopodium	0.00146	1.066	-3.408	1.301	-19.8862	0.939	0.595	30175	0
GO:0030130	clathrin coat of trans-Golgi network vesicle	0.00044	null	null	0.778	185.704	0.601	0.818	30125	1		GO:0009897	external side of plasma membrane	0.01115	-5.669	-0.539	2.185	51.0358	0.833	0.57	9897	0		GO:0042588	zymogen granule	0.00022	-0.734	-4.937	0.477	270.813	0.838	0.566	42588	0		GO:0005902	microvillus	0.00153	0.874	-3.252	1.322	-18.8317	0.939	0.597	5902	0
GO:0030131	clathrin adaptor complex	0.00168	null	null	1.362	140.062	0.74	0.895	30125	1		GO:0030130	clathrin coat of trans-Golgi network vesicle	0.00044	4.993	2.314	0.778	118.094	0.601	0.574	30130	0		GO:0044420	extracellular matrix part	0.01042	1.364	-2.033	2.155	134.772	0.917	0.594	44420	0		GO:0031514	motile cilium	0.00015	1.066	-3.428	0.301	-16.1372	0.941	0.598	31514	0
GO:0030140	trans-Golgi network transport vesicle	0.00117	null	null	1.204	128.621	0.701	0.705	30125	1		GO:0012510	trans-Golgi network transport vesicle membrane	0.00044	null	null	0.778	118.094	0.65	0.872	30130	1		GO:0005578	proteinaceous extracellular matrix	0.01778	null	null	2.387	113.645	0.914	0.862	44420	1		GO:0005884	actin filament	0.00168	-2.731	5.098	1.362	-2.3488	0.653	0.604	5884	0
GO:0030137	COPI-coated vesicle	0.00102	null	null	1.146	42.5555	0.707	0.865	30125	1		GO:0030118	clathrin coat	0.00233	null	null	1.505	53.2004	0.735	0.839	30130	1		GO:0005581	collagen	0.00612	null	null	1.924	123.799	0.916	0.767	44420	1		GO:0000779	condensed chromosome, centromeric region	0.00291	-7.114	2.37	1.602	-43.4351	0.69	0.605	779	0
GO:0030134	ER to Golgi transport vesicle	0.00073	null	null	1	23.5853	0.773	0.774	30125	1		GO:0030117	membrane coat	0.00525	null	null	1.857	33.0123	0.718	0.923	30130	1		GO:0042470	melanosome	0.00554	-0.796	-3.136	1.881	106.259	0.803	0.597	42470	0		GO:0000776	kinetochore	0.0043	null	null	1.771	-24.2151	0.611	0.885	779	1
GO:0030663	COPI coated vesicle membrane	0.00095	null	null	1.114	42.5555	0.634	0.988	30125	1		GO:0030120	vesicle coat	0.00226	null	null	1.491	29.2613	0.575	0.859	30130	1		GO:0008290	F-actin capping protein complex	0.00036	-3.146	5.077	0.699	96.5142	0.686	0.604	8290	0		GO:0000777	condensed chromosome kinetochore	0.00262	null	null	1.556	-7.7519	0.624	0.873	779	1
GO:0030660	Golgi-associated vesicle membrane	0.00153	null	null	1.322	90.4826	0.63	0.891	30125	1		GO:0030119	AP-type membrane coat adaptor complex	0.00168	null	null	1.362	102.452	0.741	0.739	30130	1		GO:0005874	microtubule	0.01188	-3.164	6.019	2.212	112.377	0.595	0.604	5874	0		GO:0005819	spindle	0.00787	-6.924	2.565	2.033	-50.9358	0.682	0.617	5819	0
GO:0030658	transport vesicle membrane	0.00182	null	null	1.398	101.293	0.641	0.828	30125	1		GO:0030126	COPI vesicle coat	0.00095	null	null	1.114	42.5555	0.583	0.881	30130	1		GO:0005815	microtubule organizing center	0.01158	null	null	2.201	81.1727	0.648	0.774	5874	1		GO:0005815	microtubule organizing center	0.01158	null	null	2.201	-29.437	0.648	0.774	5819	1
GO:0005886	plasma membrane	0.18463	-5.633	0.856	3.404	135.18	0.825	0.494	5886	0		GO:0030125	clathrin vesicle coat	0.0008	null	null	1.041	44.0793	0.602	0.895	30130	1		GO:0005819	spindle	0.00787	null	null	2.033	104.352	0.682	0.742	5874	1		GO:0005874	microtubule	0.01188	null	null	2.212	-44.5904	0.595	0.742	5819	1
GO:0044459	plasma membrane part	0.12962	null	null	3.25	146.833	0.813	0.725	5886	1		GO:0030131	clathrin adaptor complex	0.00168	null	null	1.362	102.452	0.74	0.856	30130	1		GO:0033596	TSC1-TSC2 complex	0.00015	2.547	3.894	0.301	40.8619	0.782	0.606	33596	0		GO:0042588	zymogen granule	0.00022	-0.832	-5.107	0.477	-21.5043	0.838	0.62	42588	0
GO:0033017	sarcoplasmic reticulum membrane	0.00051	5.105	3.031	0.845	39.5916	0.701	0.495	33017	0		GO:0030140	trans-Golgi network transport vesicle	0.00117	null	null	1.204	76.0306	0.701	0.814	30130	1		GO:0000792	heterochromatin	0.00291	-7.255	2.384	1.602	150.529	0.688	0.609	792	0		GO:0042589	zymogen granule membrane	0.00022	-4.922	-1.203	0.477	-21.5043	0.752	0.62	42589	0
GO:0005615	extracellular space	0.04335	-0.78	-2.099	2.775	128.407	0.963	0.499	5615	0		GO:0030137	COPI-coated vesicle	0.00102	null	null	1.146	42.5555	0.707	0.865	30130	1		GO:0000786	nucleosome	0.00692	null	null	1.978	124.736	0.609	0.765	792	1		GO:0016604	nuclear body	0.00882	-6.454	4.025	2.083	-40.2872	0.662	0.625	16604	0
GO:0031224	intrinsic to membrane	0.32087	-4.833	-0.933	3.644	123.778	0.861	0.512	31224	0		GO:0030134	ER to Golgi transport vesicle	0.00073	null	null	1	23.5853	0.773	0.723	30130	1		GO:0043205	fibril	0.00058	1.682	-2.395	0.903	46.7241	0.927	0.617	43205	0		GO:0044451	nucleoplasm part	0.0314	null	null	2.634	-23.9096	0.628	0.785	16604	1
GO:0005905	coated pit	0.00204	0.927	0.458	1.447	68.9325	0.844	0.516	5905	0		GO:0030663	COPI coated vesicle membrane	0.00095	null	null	1.114	42.5555	0.634	0.988	30130	1		GO:0000779	condensed chromosome, centromeric region	0.00291	-7.26	2.384	1.602	84.9414	0.69	0.618	779	0		GO:0043232	intracellular non-membrane-bounded organelle	0.13428	-5.057	-0.62	3.266	-9.8327	0.712	0.626	43232	0
GO:0005681	spliceosomal complex	0.00612	5.998	-3.464	1.924	78.0771	0.729	0.52	5681	0		GO:0030662	coated vesicle membrane	0.00495	null	null	1.833	11.9971	0.61	0.921	30130	1		GO:0000776	kinetochore	0.0043	null	null	1.771	71.8891	0.611	0.885	779	1		GO:0005856	cytoskeleton	0.06346	null	null	2.94	-8.2786	0.734	0.73	43232	1
GO:0005667	transcription factor complex	0.01202	5.688	-4	2.217	100.915	0.696	0.524	5667	0		GO:0030665	clathrin coated vesicle membrane	0.00335	null	null	1.663	2.147	0.618	0.896	30130	1		GO:0000777	condensed chromosome kinetochore	0.00262	null	null	1.556	59.6348	0.624	0.873	779	1		GO:0000123	histone acetyltransferase complex	0.00262	-2.404	6.502	1.556	-29.9534	0.628	0.628	123	0
GO:0005605	basal lamina	0.00066	-0.771	-2.07	0.954	312.158	0.962	0.536	5605	0		GO:0030659	cytoplasmic vesicle membrane	0.00954	null	null	2.117	16.3141	0.598	0.836	30130	1		GO:0043232	intracellular non-membrane-bounded organelle	0.13428	-5.434	-0.16	3.266	103.733	0.712	0.623	43232	0		GO:0017053	transcriptional repressor complex	0.00277	-2.498	6.763	1.58	-38.65	0.621	0.631	17053	0
GO:0005604	basement membrane	0.00437	null	null	1.778	144.262	0.96	0.708	5605	1		GO:0030660	Golgi-associated vesicle membrane	0.00153	null	null	1.322	61.6593	0.63	0.891	30130	1		GO:0005856	cytoskeleton	0.06346	null	null	2.94	108.008	0.734	0.73	43232	1		GO:0042470	melanosome	0.00554	-0.978	-3.568	1.881	-37.1579	0.803	0.636	42470	0
GO:0000781	chromosome, telomeric region	0.00153	6.434	1.1	1.322	628.353	0.785	0.537	781	0		GO:0030658	transport vesicle membrane	0.00182	null	null	1.398	64.415	0.641	0.828	30130	1		GO:0031514	motile cilium	0.00015	0.897	-3.385	0.301	16.1372	0.941	0.624	31514	0		GO:0030027	lamellipodium	0.00313	0.876	-3.23	1.633	-20.5769	0.934	0.637	30027	0
GO:0002102	podosome	0.00029	5.089	-3.351	0.602	266.884	0.746	0.538	2102	0		GO:0043679	axon terminus	0.00044	-2.682	-2.524	0.778	80.2789	0.914	0.584	43679	0		GO:0030667	secretory granule membrane	0.00124	-4.417	-0.085	1.23	162.488	0.723	0.631	30667	0		GO:0001726	ruffle	0.00321	null	null	1.643	-6.7819	0.934	0.866	30027	1
GO:0005759	mitochondrial matrix	0.01035	6.294	3.293	2.152	93.9493	0.711	0.541	5759	0		GO:0033267	axon part	0.00182	null	null	1.398	48.1674	0.906	0.721	43679	1		GO:0031012	extracellular matrix	0.02259	1.297	-1.887	2.491	111.03	0.923	0.632	31012	0		GO:0005913	cell-cell adherens junction	0.00175	4.524	-0.621	1.38	-38.3678	0.918	0.64	5913	0
GO:0031362	anchored to external side of plasma membrane	0.00015	-5.826	0.745	0.301	188.88	0.867	0.553	31362	0		GO:0005762	mitochondrial large ribosomal subunit	0.00117	6.426	1.846	1.204	27.9093	0.687	0.584	5762	0		GO:0005832	chaperonin-containing T-complex	0.00029	2.835	4.214	0.602	45.8498	0.773	0.634	5832	0		GO:0005916	fascia adherens	0.00058	null	null	0.903	-10.0906	0.92	0.732	5913	1
GO:0046658	anchored to plasma membrane	0.00102	null	null	1.146	159.321	0.851	0.725	31362	1		GO:0000315	organellar large ribosomal subunit	0.00117	null	null	1.204	27.9093	0.731	0.915	5762	1		GO:0030139	endocytic vesicle	0.0043	-0.586	-3.712	1.771	60.2127	0.807	0.636	30139	0		GO:0014704	intercalated disc	0.00087	null	null	1.079	-7.5679	0.919	0.971	5913	1
GO:0042622	photoreceptor outer segment membrane	0.00022	2.931	1.647	0.477	256.623	0.761	0.559	42622	0		GO:0005761	mitochondrial ribosome	0.00204	null	null	1.447	8.5794	0.674	0.955	5762	1		GO:0030424	axon	0.00612	1.247	-3.89	1.924	121.662	0.933	0.638	30424	0		GO:0022627	cytosolic small ribosomal subunit	0.00291	-2.877	3.485	1.602	-81.495	0.636	0.643	22627	0
GO:0035253	ciliary rootlet	0.00066	null	null	0.954	76.9777	0.718	0.767	42622	1		GO:0030141	stored secretory granule	0.00816	4.001	-3.957	2.049	142.346	0.75	0.592	30141	0		GO:0046581	intercellular canaliculus	0.00029	4.379	-0.534	0.602	56.2567	0.926	0.64	46581	0		GO:0016272	prefoldin complex	0.00095	null	null	1.114	-14.1609	0.756	0.748	22627	1
GO:0001750	photoreceptor outer segment	0.00138	null	null	1.279	162.813	0.914	0.824	42622	1		GO:0016023	cytoplasmic membrane-bounded vesicle	0.03038	null	null	2.62	12.5669	0.719	0.822	30141	1		GO:0048770	pigment granule	0.00554	-0.556	-4.016	1.881	106.259	0.803	0.652	48770	0		GO:0022626	cytosolic ribosome	0.00299	null	null	1.613	-74.7037	0.655	0.822	22627	1
GO:0031233	intrinsic to external side of plasma membrane	0.00022	-5.997	0.752	0.477	94.4399	0.865	0.57	31233	0		GO:0012506	vesicle membrane	0.00991	null	null	2.134	12.2576	0.631	0.829	30141	1		GO:0005876	spindle microtubule	0.00182	-3.27	5.636	1.398	99.0883	0.645	0.652	5876	0		GO:0005942	phosphatidylinositol 3-kinase complex	0.00087	null	null	1.079	-13.5363	0.757	0.743	22627	1
GO:0031941	filamentous actin	0.00073	5.503	-3.604	1	198.611	0.731	0.57	31941	0		GO:0031988	membrane-bounded vesicle	0.03111	null	null	2.63	11.1132	0.799	0.947	30141	1		GO:0000922	spindle pole	0.00335	null	null	1.663	65.5663	0.7	0.801	5876	1		GO:0032580	Golgi cisterna membrane	0.00233	-5.103	0.831	1.505	-44.4143	0.728	0.645	32580	0
GO:0043005	neuron projection	0.01202	-2.809	1.348	2.217	163.539	0.907	0.576	43005	0		GO:0031410	cytoplasmic vesicle	0.03177	null	null	2.639	8.0637	0.724	0.953	30141	1		GO:0005798	Golgi-associated vesicle	0.0027	-4.919	0.014	1.568	132.377	0.73	0.653	5798	0		GO:0031985	Golgi cisterna	0.00255	null	null	1.544	-44.2174	0.761	0.99	32580	1
GO:0030425	dendrite	0.00444	null	null	1.785	141.9	0.909	0.703	43005	1		GO:0044433	cytoplasmic vesicle part	0.00976	null	null	2.127	29.5548	0.7	0.708	30141	1		GO:0031985	Golgi cisterna	0.00255	-5.062	0.976	1.544	95.3718	0.761	0.655	31985	0		GO:0048770	pigment granule	0.00554	-0.822	-4.321	1.881	-37.1579	0.803	0.652	48770	0
GO:0030426	growth cone	0.00204	null	null	1.447	137.061	0.906	0.752	43005	1		GO:0030135	coated vesicle	0.00918	null	null	2.1	29.3293	0.747	0.717	30141	1		GO:0032580	Golgi cisterna membrane	0.00233	null	null	1.505	44.4143	0.728	0.99	31985	1		GO:0005881	cytoplasmic microtubule	0.0008	-2.565	3.568	1.041	-36.953	0.656	0.652	5881	0
GO:0044463	cell projection part	0.01086	null	null	2.173	96.9734	0.908	0.773	43005	1		GO:0000793	condensed chromosome	0.00568	3.216	0.007	1.892	97.006	0.835	0.596	793	0		GO:0032982	myosin filament	0.00058	-3.194	5.268	0.903	260.541	0.676	0.659	32982	0		GO:0033596	TSC1-TSC2 complex	0.00015	2.45	3.492	0.301	-40.8619	0.782	0.653	33596	0
GO:0005929	cilium	0.00605	null	null	1.919	111.251	0.912	0.726	43005	1		GO:0000228	nuclear chromosome	0.00889	null	null	2.086	1.7645	0.719	0.702	793	1		GO:0022624	proteasome accessory complex	0.00058	2.831	6.914	0.903	66.3159	0.811	0.672	22624	0		GO:0005798	Golgi-associated vesicle	0.0027	-5.051	-0.047	1.568	-13.1835	0.73	0.653	5798	0
GO:0033267	axon part	0.00182	null	null	1.398	83.4937	0.906	0.745	43005	1		GO:0015934	large ribosomal subunit	0.00321	6.28	2.047	1.643	2.5626	0.716	0.603	15934	0		GO:0005839	proteasome core complex	0.00189	null	null	1.415	34.2917	0.796	0.764	22624	1		GO:0032982	myosin filament	0.00058	-2.967	5.075	0.903	-39.5281	0.676	0.659	32982	0
GO:0015934	large ribosomal subunit	0.00321	6.224	-0.926	1.643	78.4009	0.716	0.576	15934	0		GO:0043197	dendritic spine	0.00073	-2.97	-2.693	1	173.603	0.911	0.604	43197	0		GO:0044450	microtubule organizing center part	0.00226	-5.906	1.088	1.491	98.9302	0.684	0.675	44450	0		GO:0005654	nucleoplasm	0.03563	-6.808	3.587	2.689	-18.898	0.639	0.66	5654	0
GO:0043679	axon terminus	0.00044	-3.034	1.451	0.778	139.156	0.914	0.584	43679	0		GO:0043198	dendritic shaft	0.00073	null	null	1	151.792	0.911	0.746	43197	1		GO:0005813	centrosome	0.00852	null	null	2.068	90.6595	0.651	0.812	44450	1		GO:0005730	nucleolus	0.0212	null	null	2.464	-2.0426	0.6	0.74	5654	1
GO:0030141	stored secretory granule	0.00816	2.883	4.621	2.049	188.94	0.75	0.592	30141	0		GO:0051233	spindle midzone	0.00036	6.31	0.043	0.699	10.7308	0.792	0.607	51233	0		GO:0005840	ribosome	0.02492	-1.044	3.966	2.534	74.9316	0.618	0.68	5840	0		GO:0031981	nuclear lumen	0.05916	null	null	2.91	-7.521	0.633	0.789	5654	1
GO:0016023	cytoplasmic membrane-bounded vesicle	0.03038	null	null	2.62	136.107	0.719	0.81	30141	1		GO:0005801	cis-Golgi network	0.00095	5.989	-2.189	1.114	56.3698	0.778	0.609	5801	0		GO:0044451	nucleoplasm part	0.0314	-6.735	3.349	2.634	116.514	0.628	0.68	44451	0		GO:0005875	microtubule associated complex	0.00379	-2.973	5.545	1.716	-6.1593	0.629	0.66	5875	0
GO:0012506	vesicle membrane	0.00991	null	null	2.134	73.6178	0.631	0.829	30141	1		GO:0044437	vacuolar part	0.00539	6.602	-2.043	1.869	219.343	0.752	0.619	44437	0		GO:0005730	nucleolus	0.0212	null	null	2.464	89.7275	0.6	0.727	44451	1		GO:0030672	synaptic vesicle membrane	0.00153	-4.404	-0.151	1.322	-32.0344	0.717	0.667	30672	0
GO:0031988	membrane-bounded vesicle	0.03111	null	null	2.63	134.063	0.799	0.947	30141	1		GO:0000323	lytic vacuole	0.01297	null	null	2.25	23.1994	0.786	0.952	44437	1		GO:0005654	nucleoplasm	0.03563	null	null	2.689	121.747	0.639	0.783	44451	1		GO:0022624	proteasome accessory complex	0.00058	3.072	6.684	0.903	-66.3159	0.811	0.672	22624	0
GO:0031410	cytoplasmic vesicle	0.03177	null	null	2.639	132.86	0.724	0.953	30141	1		GO:0005764	lysosome	0.01297	null	null	2.25	23.1994	0.786	0.865	44437	1		GO:0031981	nuclear lumen	0.05916	null	null	2.91	106.637	0.633	0.789	44451	1		GO:0005839	proteasome core complex	0.00189	null	null	1.415	-4.2748	0.796	0.764	22624	1
GO:0044433	cytoplasmic vesicle part	0.00976	null	null	2.127	120.932	0.7	0.822	30141	1		GO:0005922	connexon complex	0.00153	-2.397	5.397	1.322	19.5172	0.764	0.62	5922	0		GO:0016604	nuclear body	0.00882	null	null	2.083	76.9407	0.662	0.785	44451	1		GO:0044450	microtubule organizing center part	0.00226	-5.927	0.819	1.491	-36.788	0.684	0.675	44450	0
GO:0030135	coated vesicle	0.00918	null	null	2.1	150.373	0.747	0.822	30141	1		GO:0070160	occluding junction	0.00372	null	null	1.708	5.0602	0.82	0.84	5922	1		GO:0005942	phosphatidylinositol 3-kinase complex	0.00087	2.063	3.925	1.079	13.5363	0.757	0.684	5942	0		GO:0005813	centrosome	0.00852	null	null	2.068	-32.1778	0.651	0.812	44450	1
GO:0000313	organellar ribosome	0.00204	6.297	-0.867	1.447	76.6453	0.727	0.603	313	0		GO:0005923	tight junction	0.00372	null	null	1.708	5.0602	0.819	0.979	5922	1		GO:0000123	histone acetyltransferase complex	0.00262	-2.526	6.405	1.556	51.0274	0.628	0.684	123	0		GO:0005840	ribosome	0.02492	-0.766	3.459	2.534	-11.3496	0.618	0.68	5840	0
GO:0043198	dendritic shaft	0.00073	-3.187	1.644	1	272.706	0.911	0.604	43198	0		GO:0005921	gap junction	0.00182	null	null	1.398	19.0481	0.83	0.725	5922	1		GO:0005583	fibrillar collagen	0.00102	1.296	-1.915	1.146	120.162	0.924	0.684	5583	0		GO:0005769	early endosome	0.00452	-0.426	-4.016	1.792	-134.775	0.824	0.684	5769	0
GO:0043197	dendritic spine	0.00073	null	null	1	173.603	0.911	0.746	43198	1		GO:0043296	apical junction complex	0.0043	null	null	1.771	13.1344	0.817	0.789	5922	1		GO:0044430	cytoskeletal part	0.04466	-6.875	2.748	2.787	97.9724	0.649	0.685	44430	0		GO:0005770	late endosome	0.00481	null	null	1.82	-39.5165	0.824	0.754	5769	1
GO:0051233	spindle midzone	0.00036	6.36	0.962	0.699	10.7308	0.792	0.607	51233	0		GO:0005667	transcription factor complex	0.01202	5.405	5.018	2.217	7.3373	0.696	0.623	5667	0		GO:0015630	microtubule cytoskeleton	0.02893	null	null	2.599	97.9493	0.727	0.776	44430	1		GO:0010008	endosome membrane	0.0075	null	null	2.013	-25.9213	0.714	0.791	5769	1
GO:0005801	cis-Golgi network	0.00095	5.374	3.316	1.114	82.8336	0.778	0.609	5801	0		GO:0043202	lysosomal lumen	0.00022	6.584	-1.817	0.477	343.546	0.777	0.627	43202	0		GO:0005932	microtubule basal body	0.00117	-4.941	-0.477	1.204	88.9696	0.656	0.686	5932	0		GO:0044440	endosomal part	0.0075	null	null	2.013	-25.9213	0.74	0.827	5769	1
GO:0005747	mitochondrial respiratory chain complex I	0.00743	5.145	-1.807	2.009	58.4395	0.599	0.619	5747	0		GO:0044463	cell projection part	0.01086	-1.924	-2.172	2.173	50.7351	0.908	0.628	44463	0		GO:0005875	microtubule associated complex	0.00379	-3.232	5.795	1.716	72.726	0.629	0.687	5875	0		GO:0005832	chaperonin-containing T-complex	0.00029	2.774	3.712	0.602	-45.8498	0.773	0.685	5832	0
GO:0005746	mitochondrial respiratory chain	0.00867	null	null	2.076	39.6118	0.626	0.87	5747	1		GO:0043005	neuron projection	0.01202	null	null	2.217	7.0775	0.907	0.773	44463	1		GO:0005770	late endosome	0.00481	-0.2	-3.693	1.82	141.663	0.824	0.688	5770	0		GO:0005932	microtubule basal body	0.00117	-4.853	-0.706	1.204	-7.2398	0.656	0.686	5932	0
GO:0005751	mitochondrial respiratory chain complex IV	0.00029	null	null	0.602	17.0473	0.683	0.722	5747	1		GO:0005929	cilium	0.00605	null	null	1.919	6.7357	0.912	0.718	44463	1		GO:0005769	early endosome	0.00452	null	null	1.792	134.775	0.824	0.754	5770	1		GO:0005581	collagen	0.00612	0.963	-0.96	1.924	-123.799	0.916	0.694	5581	0
GO:0032592	integral to mitochondrial membrane	0.00095	null	null	1.114	50.2001	0.673	0.708	5747	1		GO:0001740	Barr body	0.00022	5.684	0.242	0.477	33.3806	0.78	0.634	1740	0		GO:0010008	endosome membrane	0.0075	null	null	2.013	45.4786	0.714	0.791	5770	1		GO:0043205	fibril	0.00058	null	null	0.903	-15.4584	0.927	0.72	5581	1
GO:0045271	respiratory chain complex I	0.00743	null	null	2.009	58.4395	0.806	0.993	5747	1		GO:0000805	X chromosome	0.00029	null	null	0.602	25.0354	0.863	0.822	1740	1		GO:0044440	endosomal part	0.0075	null	null	2.013	45.4786	0.74	0.827	5770	1		GO:0044420	extracellular matrix part	0.01042	null	null	2.155	-30.036	0.917	0.767	5581	1
GO:0000228	nuclear chromosome	0.00889	6.305	1.127	2.086	171.703	0.719	0.62	228	0		GO:0032592	integral to mitochondrial membrane	0.00095	5.638	-1.138	1.114	50.2001	0.673	0.639	32592	0		GO:0017053	transcriptional repressor complex	0.00277	-2.64	6.668	1.58	97.1966	0.621	0.688	17053	0		GO:0005578	proteinaceous extracellular matrix	0.01778	null	null	2.387	-4.9261	0.914	0.862	5581	1
GO:0000793	condensed chromosome	0.00568	null	null	1.892	157.51	0.835	0.702	228	1		GO:0005606	laminin-1 complex	7e-05	0.354	5.891	0	30.8011	0.884	0.642	5606	0		GO:0042583	chromaffin granule	0.00095	-0.548	-4.862	1.114	40.5903	0.822	0.698	42583	0		GO:0005583	fibrillar collagen	0.00102	null	null	1.146	-120.162	0.924	0.754	5581	1
GO:0015030	Cajal body	0.00175	6.463	1.001	1.38	44.5981	0.786	0.623	15030	0		GO:0043256	laminin complex	0.00015	null	null	0.301	23.1008	0.88	0.798	5606	1		GO:0030672	synaptic vesicle membrane	0.00153	-4.391	-0.163	1.322	96.4265	0.717	0.699	30672	0		GO:0030667	secretory granule membrane	0.00124	-4.443	-0.067	1.23	-12.9026	0.723	0.699	30667	0
GO:0009434	microtubule-based flagellum	0.00138	-2.052	1.397	1.279	66.2458	0.842	0.628	9434	0		GO:0044431	Golgi apparatus part	0.01894	6.606	-2.041	2.415	38.4805	0.728	0.644	44431	0
GO:0001740	Barr body	0.00022	5.784	0.652	0.477	62.3922	0.78	0.634	1740	0		GO:0019861	flagellum	0.00204	-2.273	-2.356	1.447	3.9397	0.852	0.645	19861	0
GO:0000805	X chromosome	0.00029	null	null	0.602	46.7941	0.863	0.822	1740	1		GO:0044429	mitochondrial part	0.04627	6.723	-1.939	2.803	33.0998	0.713	0.65	44429	0
GO:0005903	brush border	0.00153	-2.247	1.228	1.322	101.086	0.92	0.634	5903	0		GO:0033093	Weibel-Palade body	0.00036	2.525	-3.558	0.699	115.885	0.784	0.655	33093	0
GO:0005606	laminin-1 complex	7e-05	0.922	-5.624	0	229.701	0.884	0.642	5606	0		GO:0046696	lipopolysaccharide receptor complex	0.0008	0.72	6.644	1.041	85.3676	0.839	0.66	46696	0
GO:0043256	laminin complex	0.00015	null	null	0.301	172.276	0.88	0.798	5606	1		GO:0008305	integrin complex	0.00284	null	null	1.591	27.3601	0.765	0.734	46696	1
GO:0044431	Golgi apparatus part	0.01894	5.957	3.374	2.415	121.243	0.728	0.644	44431	0		GO:0005887	integral to plasma membrane	0.02091	null	null	2.458	15.731	0.811	0.764	46696	1
GO:0019861	flagellum	0.00204	-2.761	1.338	1.447	75.5552	0.852	0.651	19861	0		GO:0030133	transport vesicle	0.00437	3.725	-3.926	1.778	35.3947	0.763	0.662	30133	0
GO:0033093	Weibel-Palade body	0.00036	1.772	3.99	0.699	229.158	0.784	0.655	33093	0		GO:0031672	A band	0.00029	5.462	-1.42	0.602	54.5261	0.791	0.664	31672	0
GO:0005789	endoplasmic reticulum membrane	0.02142	4.264	3.198	2.468	141.556	0.601	0.659	5789	0		GO:0030426	growth cone	0.00204	-2.491	-2.447	1.447	113.421	0.906	0.667	30426	0
GO:0042175	nuclear outer membrane-endoplasmic reticulum membrane network	0.02164	null	null	2.473	146.762	0.81	0.726	5789	1		GO:0031253	cell projection membrane	0.00313	null	null	1.633	66.086	0.778	0.757	30426	1
GO:0005788	endoplasmic reticulum lumen	0.00291	null	null	1.602	69.8931	0.739	0.75	5789	1		GO:0030425	dendrite	0.00444	null	null	1.785	38.537	0.909	0.752	30426	1
GO:0044432	endoplasmic reticulum part	0.02419	null	null	2.521	121.715	0.724	0.799	5789	1		GO:0044441	cilium part	0.00233	null	null	1.505	73.7344	0.747	0.73	30426	1
GO:0046696	lipopolysaccharide receptor complex	0.0008	1.094	-6.245	1.041	234.589	0.839	0.66	46696	0		GO:0016459	myosin complex	0.00364	4.946	4.485	1.699	49.4783	0.699	0.673	16459	0
GO:0030133	transport vesicle	0.00437	2.637	4.534	1.778	82.2969	0.763	0.662	30133	0		GO:0042641	actomyosin	0.00138	null	null	1.279	41.8325	0.764	0.708	16459	1
GO:0005887	integral to plasma membrane	0.02091	-5.633	0.003	2.458	138.696	0.811	0.664	5887	0		GO:0032432	actin filament bundle	0.00138	null	null	1.279	41.8325	0.764	0.708	16459	1
GO:0008305	integrin complex	0.00284	null	null	1.591	109.423	0.765	0.764	5887	1		GO:0001725	stress fiber	0.00131	null	null	1.255	41.8325	0.765	0.705	16459	1
GO:0005744	mitochondrial inner membrane presequence translocase complex	0.00044	5.92	-2.01	0.778	38.2219	0.68	0.665	5744	0		GO:0005859	muscle myosin complex	0.00036	5.931	2.955	0.699	88.9973	0.718	0.674	5859	0
GO:0005925	focal adhesion	0.00415	-5.723	0.8	1.756	160.226	0.818	0.67	5925	0		GO:0016460	myosin II complex	0.00044	null	null	0.778	66.748	0.739	0.715	5859	1
GO:0070161	anchoring junction	0.00678	null	null	1.968	114.634	0.817	0.708	5925	1		GO:0030016	myofibril	0.00495	null	null	1.833	6.3563	0.777	0.779	5859	1
GO:0005912	adherens junction	0.00619	null	null	1.929	123.67	0.814	0.939	5925	1		GO:0016471	vacuolar proton-transporting V-type ATPase complex	0.00073	5.028	2.7	1	289.96	0.658	0.676	16471	0
GO:0005911	cell-cell junction	0.00925	null	null	2.104	92.7522	0.812	0.767	5925	1		GO:0000276	mitochondrial proton-transporting ATP synthase complex, coupling factor F(o)	0.00131	null	null	1.255	2.1646	0.641	0.881	16471	1
GO:0005924	cell-substrate adherens junction	0.0043	null	null	1.771	156.429	0.818	0.986	5925	1		GO:0005765	lysosomal membrane	0.00328	null	null	1.653	220.192	0.679	0.807	16471	1
GO:0030057	desmosome	0.0008	null	null	1.041	52.0509	0.836	0.787	5925	1		GO:0005774	vacuolar membrane	0.00525	null	null	1.857	106.167	0.667	0.947	16471	1
GO:0030055	cell-substrate junction	0.00444	null	null	1.785	148.98	0.821	0.845	5925	1		GO:0005753	mitochondrial proton-transporting ATP synthase complex	0.00342	null	null	1.672	7.5842	0.615	0.835	16471	1
GO:0016459	myosin complex	0.00364	5.36	-3.55	1.699	114.02	0.699	0.673	16459	0		GO:0033180	proton-transporting V-type ATPase, V1 domain	0.0008	null	null	1.041	37.1354	0.828	0.883	16471	1
GO:0042641	actomyosin	0.00138	null	null	1.279	106.567	0.764	0.708	16459	1		GO:0033178	proton-transporting two-sector ATPase complex, catalytic domain	0.00197	null	null	1.431	20.1866	0.819	0.79	16471	1
GO:0032432	actin filament bundle	0.00138	null	null	1.279	106.567	0.764	0.708	16459	1		GO:0033176	proton-transporting V-type ATPase complex	0.00175	null	null	1.38	115.95	0.82	0.733	16471	1
GO:0001725	stress fiber	0.00131	null	null	1.255	106.567	0.765	0.705	16459	1		GO:0044421	extracellular region part	0.06033	-0.969	1.803	2.918	28.1233	0.968	0.678	44421	0
GO:0030485	smooth muscle contractile fiber	0.00029	5.424	2.519	0.602	215.888	0.791	0.674	30485	0		GO:0016591	DNA-directed RNA polymerase II, holoenzyme	0.0043	4.858	4.831	1.771	2.611	0.72	0.679	16591	0
GO:0031672	A band	0.00029	5.265	2.417	0.602	54.5261	0.791	0.674	31672	0		GO:0005792	microsome	0.00772	-0.709	-0.808	2.025	28.271	0.963	0.685	5792	0
GO:0034707	chloride channel complex	0.00146	1.011	-6.543	1.301	144.548	0.828	0.675	34707	0		GO:0042598	vesicular fraction	0.0078	null	null	2.029	28.271	0.963	0.77	5792	1
GO:0034704	calcium channel complex	0.00233	null	null	1.505	89.2927	0.822	0.816	34707	1		GO:0005626	insoluble fraction	0.02251	null	null	2.49	11.0999	0.961	0.928	5792	1
GO:0005891	voltage-gated calcium channel complex	0.00219	null	null	1.477	84.2951	0.774	0.74	34707	1		GO:0005624	membrane fraction	0.02186	null	null	2.477	15.0869	0.96	0.855	5792	1
GO:0005624	membrane fraction	0.02186	-1.526	0.288	2.477	86.0299	0.96	0.677	5624	0		GO:0030864	cortical actin cytoskeleton	0.00095	2.807	-2.412	1.114	47.8121	0.689	0.687	30864	0
GO:0042598	vesicular fraction	0.0078	null	null	2.029	74.9106	0.963	0.855	5624	1		GO:0030863	cortical cytoskeleton	0.00262	null	null	1.556	12.3882	0.713	0.842	30864	1
GO:0005626	insoluble fraction	0.02251	null	null	2.49	87.5636	0.961	0.928	5624	1		GO:0044448	cell cortex part	0.00452	null	null	1.792	0.8355	0.775	0.875	30864	1
GO:0019717	synaptosome	0.00233	null	null	1.505	63.0117	0.966	0.75	5624	1		GO:0031105	septin complex	0.00109	null	null	1.176	24.1132	0.665	0.78	30864	1
GO:0005792	microsome	0.00772	null	null	2.025	74.9106	0.963	0.854	5624	1		GO:0070013	intracellular organelle lumen	0.07264	6.602	-0.008	2.999	1.2927	0.725	0.69	70013	0
GO:0044421	extracellular region part	0.06033	-0.823	-2.113	2.918	117.037	0.968	0.678	44421	0		GO:0043233	organelle lumen	0.07279	null	null	3	1.0742	0.737	0.918	70013	1
GO:0016591	DNA-directed RNA polymerase II, holoenzyme	0.0043	5.242	-3.869	1.771	95.0786	0.72	0.679	16591	0		GO:0005869	dynactin complex	0.00029	5.022	4.628	0.602	40.8827	0.739	0.692	5869	0
GO:0031253	cell projection membrane	0.00313	-6.075	1.376	1.633	102.088	0.778	0.689	31253	0		GO:0042645	mitochondrial nucleoid	0.00197	7.137	-1.728	1.431	11.0229	0.72	0.697	42645	0
GO:0044441	cilium part	0.00233	null	null	1.505	89.8218	0.747	0.757	31253	1		GO:0000421	autophagic vacuole membrane	0.00044	6.617	-1.611	0.778	133.768	0.722	0.698	421	0
GO:0070013	intracellular organelle lumen	0.07264	6.347	1.252	2.999	103.508	0.725	0.69	70013	0		GO:0030897	HOPS complex	0.00044	5.478	3.05	0.778	139.03	0.684	0.698	30897	0
GO:0043233	organelle lumen	0.07279	null	null	3	103.498	0.737	0.918	70013	1		GO:0034704	calcium channel complex	0.00233	0.494	6.93	1.505	58.5184	0.822	0.699	34704	0
GO:0005869	dynactin complex	0.00029	5.543	-3.641	0.602	54.0515	0.739	0.692	5869	0		GO:0034707	chloride channel complex	0.00146	null	null	1.301	25.4488	0.828	0.743	34704	1
GO:0042645	mitochondrial nucleoid	0.00197	6.623	2.992	1.431	11.0229	0.72	0.697	42645	0		GO:0005891	voltage-gated calcium channel complex	0.00219	null	null	1.477	47.366	0.774	0.816	34704	1

## Sheet: REVIGO table results GO MF
MOLECULAR FUNCTION
ACTIVATED DURING LACTATION											Total unique	ACTIVATED DURING LACTATION											Total unique	INHIBITED DURING LACTATION											Total unique	INHIBITED DURING LACTATION											Total unique
ONLY IMPACT RESULTS											248	DIRECTION OF THE IMPACT RESULTS											262	ONLY IMPACT RESULTS											252	DIRECTION OF THE IMPACT RESULTS											251
term ID	description	frequency	plot_X	plot_Y	plot_size	value	uniqueness	dispensability	representative	eliminated		term ID	description	frequency	plot_X	plot_Y	plot_size	value	uniqueness	dispensability	representative	eliminated		term ID	description	frequency	plot_X	plot_Y	plot_size	value	uniqueness	dispensability	representative	eliminated		term ID	description	frequency	plot_X	plot_Y	plot_size	value	uniqueness	dispensability	representative	eliminated
GO:0001786	phosphatidylserine binding	0.0007	0.29	0.09	1	1646.05	0.961	0	1786	0		GO:0004461	lactose synthase activity	0.00056	-3.431	-6.344	0.903	4937.69	0.872	0	4461	0		GO:0003705	sequence-specific enhancer binding RNA polymerase II transcription factor activity	0.0021	-0.489	-0.174	1.477	166.935	0.991	0	3705	0		GO:0003705	sequence-specific enhancer binding RNA polymerase II transcription factor activity	0.0021	-1.031	0.185	1.477	-166.935	0.994	0	3705	0
GO:0004461	lactose synthase activity	0.00056	-1.699	-6.74	0.903	4937.69	0.892	0	4461	0		GO:0015020	glucuronosyltransferase activity	0.00084	null	null	1.079	118.795	0.87	0.739	4461	1		GO:0003714	transcription corepressor activity	0.00307	-0.824	-0.112	1.643	76.9013	0.99	0	3714	0		GO:0004611	phosphoenolpyruvate carboxykinase activity	0.00021	-2.124	1.222	0.477	-1003.52	0.912	0	4611	0
GO:0035250	UDP-galactosyltransferase activity	0.00119	null	null	1.23	1393.27	0.886	0.875	4461	1		GO:0035250	UDP-galactosyltransferase activity	0.00119	null	null	1.23	1281.25	0.866	0.875	4461	1		GO:0030374	ligand-dependent nuclear receptor transcription coactivator activity	0.00133	null	null	1.279	76.4322	0.99	0.74	3714	1		GO:0016831	carboxy-lyase activity	0.00258	null	null	1.568	-143.455	0.898	0.776	4611	1
GO:0008375	acetylglucosaminyltransferase activity	0.00182	null	null	1.415	129.675	0.884	0.781	4461	1		GO:0005212	structural constituent of eye lens	0.00154	3.891	-1.327	1.342	74.07	0.992	0	5212	0		GO:0004611	phosphoenolpyruvate carboxykinase activity	0.00021	-1.149	-0.934	0.477	1003.52	0.914	0	4611	0		GO:0005031	tumor necrosis factor receptor activity	0.00028	-6.139	-0.184	0.602	-472.45	0.88	0	5031	0
GO:0005198	structural molecule activity	0.04037	3.381	0.793	2.762	87.7685	0.994	0	5198	0		GO:0008191	metalloendopeptidase inhibitor activity	0.00084	-0.993	0.669	1.079	768.483	0.933	0	8191	0		GO:0016831	carboxy-lyase activity	0.00258	null	null	1.568	157.016	0.899	0.776	4611	1		GO:0005201	extracellular matrix structural constituent	0.00175	-2.443	1.301	1.398	-96.1091	0.991	0	5201	0
GO:0005200	structural constituent of cytoskeleton	0.00063	1.498	0.642	0.954	167.266	0.989	0	5200	0		GO:0048551	metalloenzyme inhibitor activity	0.00084	null	null	1.079	768.483	0.934	0.988	8191	1		GO:0005031	tumor necrosis factor receptor activity	0.00028	-6.194	-0.034	0.602	472.45	0.899	0	5031	0		GO:0016566	specific transcriptional repressor activity	0.00286	-1.076	0.192	1.613	-152.472	0.994	0	16566	0
GO:0008191	metalloendopeptidase inhibitor activity	0.00084	-0.405	-0.205	1.079	768.483	0.932	0	8191	0		GO:0030414	peptidase inhibitor activity	0.01432	null	null	2.312	83.7285	0.922	0.951	8191	1		GO:0005201	extracellular matrix structural constituent	0.00175	-2.079	-0.465	1.398	127.712	0.991	0	5201	0		GO:0017080	sodium channel regulator activity	7e-05	-0.984	0.14	0	-157.601	0.981	0	17080	0
GO:0048551	metalloenzyme inhibitor activity	0.00084	null	null	1.079	768.483	0.933	0.988	8191	1		GO:0004866	endopeptidase inhibitor activity	0.01285	null	null	2.265	96.0375	0.922	0.747	8191	1		GO:0008200	ion channel inhibitor activity	0.00035	-1.682	-0.6	0.699	204.289	0.985	0	8200	0		GO:0016248	channel inhibitor activity	0.00035	null	null	0.699	-91.1736	0.98	0.861	17080	1
GO:0030414	peptidase inhibitor activity	0.01432	null	null	2.312	151.537	0.919	0.951	8191	1		GO:0015114	phosphate transmembrane transporter activity	0.00049	-1.612	6.771	0.845	874.278	0.86	0	15114	0		GO:0016248	channel inhibitor activity	0.00035	null	null	0.699	204.289	0.985	0.861	8200	1		GO:0015459	potassium channel regulator activity	0.00049	null	null	0.845	-70.7117	0.98	0.88	17080	1
GO:0004866	endopeptidase inhibitor activity	0.01285	null	null	2.265	150.992	0.92	0.747	8191	1		GO:0015103	inorganic anion transmembrane transporter activity	0.00189	null	null	1.431	296.394	0.846	0.707	15114	1		GO:0017080	sodium channel regulator activity	7e-05	null	null	0	157.601	0.985	0.782	8200	1		GO:0008200	ion channel inhibitor activity	0.00035	null	null	0.699	-91.1736	0.98	0.782	17080	1
GO:0004869	cysteine-type endopeptidase inhibitor activity	0.00307	null	null	1.643	139.985	0.928	0.842	8191	1		GO:0016209	antioxidant activity	0.00398	1.703	-0.877	1.756	522.364	0.994	0	16209	0		GO:0008607	phosphorylase kinase regulator activity	0.00014	1.203	1.139	0.301	450.261	0.95	0	8607	0		GO:0030235	nitric-oxide synthase regulator activity	0.00028	1.249	-0.047	0.602	-276.34	0.951	0	30235	0
GO:0009055	electron carrier activity	0.01914	2.047	1.076	2.438	87.9	0.994	0	9055	0		GO:0016455	RNA polymerase II transcription mediator activity	0.00133	0.564	-0.401	1.279	115.113	0.987	0	16455	0		GO:0016566	specific transcriptional repressor activity	0.00286	-0.521	-0.129	1.613	152.472	0.988	0	16566	0		GO:0030374	ligand-dependent nuclear receptor transcription coactivator activity	0.00133	-3.271	1.894	1.279	-76.4322	0.994	0	30374	0
GO:0015114	phosphate transmembrane transporter activity	0.00049	-2.131	6.879	0.845	983.626	0.848	0	15114	0		GO:0016251	general RNA polymerase II transcription factor activity	0.00182	null	null	1.415	85.4019	0.987	0.792	16455	1		GO:0030528	transcription regulator activity	0.04567	-1.748	-0.431	2.816	105.448	0.995	0	30528	0		GO:0030545	receptor regulator activity	0.00098	-1.368	-0.007	1.146	-75.5169	0.994	0	30545	0
GO:0005254	chloride channel activity	0.00279	null	null	1.602	104.597	0.816	0.808	15114	1		GO:0016530	metallochaperone activity	0.00028	1.333	-0.948	0.602	49.8233	0.994	0	16530	0		GO:0030545	receptor regulator activity	0.00098	-1.787	-0.433	1.146	75.5169	0.994	0	30545	0		GO:0030547	receptor inhibitor activity	0.00042	-1.48	0.04	0.778	-151.034	0.984	0	30547	0
GO:0005253	anion channel activity	0.0037	null	null	1.724	89.1012	0.812	0.855	15114	1		GO:0019855	calcium channel inhibitor activity	0.00014	1.518	-1.072	0.301	113.116	0.99	0	19855	0		GO:0030547	receptor inhibitor activity	0.00042	-1.902	-0.443	0.778	151.034	0.984	0	30547	0		GO:0048019	receptor antagonist activity	0.00042	null	null	0.778	-120.202	0.9	0.89	30547	1
GO:0015296	anion:cation symporter activity	0.0014	null	null	1.301	319.68	0.806	0.764	15114	1		GO:0005246	calcium channel regulator activity	0.00035	null	null	0.699	75.4106	0.99	0.814	19855	1		GO:0048019	receptor antagonist activity	0.00042	null	null	0.778	90.1514	0.898	0.89	30547	1		GO:0030548	acetylcholine receptor regulator activity	0.00021	null	null	0.477	-92.4477	0.985	0.852	30547	1
GO:0015293	symporter activity	0.00636	null	null	1.959	206.928	0.801	0.766	15114	1		GO:0030276	clathrin binding	0.00049	6.841	-1.042	0.845	1593.84	0.93	0	30276	0		GO:0030548	acetylcholine receptor regulator activity	0.00021	null	null	0.477	92.4477	0.985	0.852	30547	1		GO:0051739	ammonia transmembrane transporter activity	0.00035	2.04	-1.351	0.699	-242.995	0.949	0	51739	0
GO:0015103	inorganic anion transmembrane transporter activity	0.00189	null	null	1.431	346.862	0.833	0.707	15114	1		GO:0042056	chemoattractant activity	0.00133	1.832	-1.661	1.279	301.192	0.994	0	42056	0		GO:0051739	ammonia transmembrane transporter activity	0.00035	2.747	-2.762	0.699	425.845	0.943	0	51739	0		GO:0002054	nucleobase binding	0.00014	-0.823	0.13	0.301	-119.443	0.984	0.017	2054	0
GO:0016209	antioxidant activity	0.00398	1.912	1.233	1.756	552.997	0.994	0	16209	0		GO:0045182	translation regulator activity	0.00091	0.177	-0.155	1.114	91.4261	0.994	0	45182	0		GO:0017129	triglyceride binding	7e-05	-0.368	0.08	0	414.935	0.965	0.017	17129	0		GO:0002060	purine base binding	0.00014	-0.767	0.123	0.301	-119.443	0.984	0.017	2060	0
GO:0016247	channel regulator activity	0.00105	3.077	1.458	1.176	174.24	0.994	0	16247	0		GO:0015643	toxin binding	0.00021	0.641	-0.441	0.477	386.792	0.98	0.018	15643	0		GO:0050897	cobalt ion binding	7e-05	-1.755	-0.309	0	79.1959	0.981	0.017	50897	0		GO:0008035	high-density lipoprotein particle binding	0.00021	-3.013	1.619	0.477	-402.364	0.983	0.018	8035	0
GO:0016455	RNA polymerase II transcription mediator activity	0.00133	0.401	0.214	1.279	152.419	0.984	0	16455	0		GO:0031491	nucleosome binding	0.00021	1.389	-0.828	0.477	621.959	0.98	0.018	31491	0		GO:0002054	nucleobase binding	0.00014	-0.687	-0.345	0.301	332.624	0.982	0.017	2054	0		GO:0031210	phosphatidylcholine binding	0.00028	-0.558	0.011	0.602	-268.243	0.955	0.018	31210	0
GO:0016251	general RNA polymerase II transcription factor activity	0.00182	null	null	1.415	116.89	0.984	0.792	16455	1		GO:0032552	deoxyribonucleotide binding	0.00021	0.083	-0.047	0.477	774.203	0.972	0.018	32552	0		GO:0002060	purine base binding	0.00014	-0.631	-0.326	0.301	332.624	0.982	0.017	2060	0		GO:0051380	norepinephrine binding	0.00028	null	null	0.602	-70.7117	0.979	0.822	31210	1
GO:0019855	calcium channel inhibitor activity	0.00014	1.812	1.185	0.301	113.116	0.994	0	19855	0		GO:0042301	phosphate binding	0.00035	-0.036	0.058	0.699	1400.12	0.972	0.019	42301	0		GO:0008035	high-density lipoprotein particle binding	0.00021	-3.375	-0.552	0.477	301.773	0.982	0.018	8035	0		GO:0050997	quaternary ammonium group binding	0.00028	-1.118	0.192	0.602	-268.243	0.983	0.018	50997	0
GO:0042056	chemoattractant activity	0.00133	3.391	1.065	1.279	301.192	0.994	0	42056	0		GO:0005000	vasopressin receptor activity	0.00042	-1.722	-2.397	0.778	763.384	0.929	0.019	5000	0		GO:0050997	quaternary ammonium group binding	0.00028	-1.026	-0.422	0.602	201.182	0.982	0.018	50997	0		GO:0031419	cobalamin binding	0.0007	-1.844	0.897	1	-112.11	0.979	0.019	31419	0
GO:0015643	toxin binding	0.00021	0.469	0.238	0.477	386.792	0.978	0.019	15643	0		GO:0008429	phosphatidylethanolamine binding	0.00042	0.225	-0.151	0.778	1370.91	0.959	0.019	8429	0		GO:0016208	AMP binding	0.00063	-1.515	-0.457	0.954	189.508	0.974	0.019	16208	0		GO:0019825	oxygen binding	0.00147	-3.452	1.791	1.322	-48.2549	0.982	0.021	19825	0
GO:0031491	nucleosome binding	0.00021	1.452	0.881	0.477	621.959	0.978	0.019	31491	0		GO:0005537	mannose binding	0.00077	0.21	-0.155	1.041	524.552	0.969	0.02	5537	0		GO:0003682	chromatin binding	0.00992	-0.74	-0.367	2.152	156.003	0.978	0.025	3682	0		GO:0003682	chromatin binding	0.00992	-0.955	0.082	2.152	-40.352	0.98	0.027	3682	0
GO:0032552	deoxyribonucleotide binding	0.00021	-0.735	-0.499	0.477	774.203	0.961	0.019	32552	0		GO:0051537	2 iron, 2 sulfur cluster binding	0.00133	1.114	-0.656	1.279	256.04	0.974	0.021	51537	0		GO:0031419	cobalamin binding	0.0007	-1.295	-0.154	1	112.11	0.966	0.025	31419	0		GO:0008907	integrase activity	7e-05	-0.638	0.094	0	-131.284	0.926	0.062	8907	0
GO:0042301	phosphate binding	0.00035	-0.979	-0.673	0.699	1400.12	0.959	0.019	42301	0		GO:0051536	iron-sulfur cluster binding	0.00419	null	null	1.778	60.2607	0.972	0.901	51537	1		GO:0043178	alcohol binding	0.00119	-3.186	-0.674	1.23	138.239	0.98	0.026	43178	0		GO:0003883	CTP synthase activity	0.00014	-0.503	0.179	0.301	-347.471	0.901	0.065	3883	0
GO:0031404	chloride ion binding	7e-05	null	null	0	128.335	0.962	0.869	42301	1		GO:0043022	ribosome binding	0.00098	1.638	-1.245	1.146	76.0286	0.979	0.022	43022	0		GO:0019825	oxygen binding	0.00147	-3.761	-0.705	1.322	93.0274	0.98	0.027	19825	0		GO:0003918	DNA topoisomerase (ATP-hydrolyzing) activity	0.00014	0.222	0.113	0.301	-442.621	0.871	0.065	3918	0
GO:0005000	vasopressin receptor activity	0.00042	-0.732	-3.475	0.778	763.384	0.926	0.02	5000	0		GO:0005528	FK506 binding	0.00105	0.325	-0.278	1.176	79.1832	0.974	0.022	5528	0		GO:0060090	binding, bridging	0.00335	-2.87	-0.576	1.681	72.0028	0.979	0.029	60090	0		GO:0008479	queuine tRNA-ribosyltransferase activity	0.00014	2.75	-6.915	0.301	-422.624	0.858	0.065	8479	0
GO:0008528	peptide receptor activity, G-protein coupled	0.00929	null	null	2.124	95.3954	0.909	0.744	5000	1		GO:0005527	macrolide binding	0.00105	null	null	1.176	79.1832	0.974	0.841	5528	1		GO:0031406	carboxylic acid binding	0.00684	-2.432	-0.539	1.991	63.56	0.978	0.031	31406	0		GO:0003950	NAD+ ADP-ribosyltransferase activity	0.00133	null	null	1.279	-46.9229	0.837	0.708	8479	1
GO:0001653	peptide receptor activity	0.00929	null	null	2.124	95.3954	0.916	0.888	5000	1		GO:0008430	selenium binding	0.00126	0.701	-0.48	1.255	231.822	0.979	0.022	8430	0		GO:0019842	vitamin binding	0.00901	-2.438	-0.698	2.111	72.2957	0.978	0.032	19842	0		GO:0015926	glucosidase activity	0.00014	3.801	5.746	0.301	-316.202	0.868	0.065	15926	0
GO:0001883	purine nucleoside binding	0.00049	1.78	1.162	0.845	107.558	0.977	0.02	1883	0		GO:0048038	quinone binding	0.00133	1.49	-1.022	1.279	72.6084	0.972	0.022	48038	0		GO:0000166	nucleotide binding	0.14743	-0.438	-0.249	3.324	115.476	0.973	0.045	166	0		GO:0004748	ribonucleoside-diphosphate reductase activity	0.00028	3.324	-0.962	0.602	-490.844	0.874	0.067	4748	0
GO:0030276	clathrin binding	0.00049	7.181	0.604	0.845	1593.84	0.929	0.02	30276	0		GO:0008144	drug binding	0.00307	1.88	-1.409	1.643	188.083	0.977	0.024	8144	0		GO:0008907	integrase activity	7e-05	-0.389	-0.222	0	131.284	0.928	0.062	8907	0		GO:0016728	oxidoreductase activity, acting on CH or CH2 groups, disulfide as acceptor	0.00028	null	null	0.602	-490.844	0.874	0.931	4748	1
GO:0001882	nucleoside binding	0.0007	1.752	1.143	1	106.944	0.977	0.02	1882	0		GO:0001530	lipopolysaccharide binding	0.00161	0.873	-0.675	1.362	85.3676	0.978	0.024	1530	0		GO:0003883	CTP synthase activity	0.00014	0.605	-0.479	0.301	347.471	0.896	0.065	3883	0		GO:0019239	deaminase activity	0.00105	-2.746	1.631	1.176	-60.7807	0.913	0.075	19239	0
GO:0005537	mannose binding	0.00077	0.23	0.126	1.041	524.552	0.959	0.02	5537	0		GO:0043021	ribonucleoprotein binding	0.00223	1.608	-1.233	1.505	56.6753	0.978	0.025	43021	0		GO:0003918	DNA topoisomerase (ATP-hydrolyzing) activity	0.00014	0.51	0.258	0.301	485.812	0.873	0.065	3918	0		GO:0008641	small protein activating enzyme activity	0.00056	-2.302	1.205	0.903	-37.5901	0.917	0.078	8641	0
GO:0008144	drug binding	0.00307	1.753	0.945	1.643	317.245	0.974	0.023	8144	0		GO:0042165	neurotransmitter binding	0.00363	1.807	-0.822	1.716	130.619	0.977	0.026	42165	0		GO:0004649	poly(ADP-ribose) glycohydrolase activity	0.00014	3.885	-6.083	0.301	601.364	0.87	0.065	4649	0		GO:0050897	cobalt ion binding	7e-05	-2.539	1.334	0	-79.1959	0.983	0.137	50897	0
GO:0008430	selenium binding	0.00126	0.523	0.197	1.255	284.868	0.976	0.024	8430	0		GO:0043176	amine binding	0.00524	2.069	-1.531	1.875	111.948	0.977	0.027	43176	0		GO:0008479	queuine tRNA-ribosyltransferase activity	0.00014	2.665	6.744	0.301	422.624	0.864	0.065	8479	0		GO:0034190	apolipoprotein receptor binding	0.00014	-6.447	0.77	0.301	-402.364	0.915	0.155	34190	0
GO:0051537	2 iron, 2 sulfur cluster binding	0.00133	0.998	0.582	1.279	261.286	0.971	0.024	51537	0		GO:0051540	metal cluster binding	0.00419	1.065	-0.705	1.778	60.2607	0.977	0.028	51540	0		GO:0003950	NAD+ ADP-ribosyltransferase activity	0.00133	null	null	1.279	81.0499	0.844	0.708	8479	1		GO:0034452	dynactin binding	0.00014	-6.425	0.648	0.301	-238.068	0.926	0.155	34452	0
GO:0051536	iron-sulfur cluster binding	0.00419	null	null	1.778	145.246	0.969	0.901	51537	1		GO:0008289	lipid binding	0.01886	1.255	-0.924	2.431	68.2498	0.975	0.032	8289	0		GO:0004748	ribonucleoside-diphosphate reductase activity	0.00028	2.961	1.802	0.602	490.844	0.882	0.067	4748	0		GO:0034186	apolipoprotein A-I binding	0.00021	-6.174	0.707	0.477	-335.429	0.929	0.159	34186	0
GO:0001530	lipopolysaccharide binding	0.00161	0.788	0.503	1.362	234.589	0.976	0.024	1530	0		GO:0046906	tetrapyrrole binding	0.01313	1.823	-1.364	2.274	65.1415	0.975	0.036	46906	0		GO:0016728	oxidoreductase activity, acting on CH or CH2 groups, disulfide as acceptor	0.00028	null	null	0.602	490.844	0.882	0.931	4748	1		GO:0019864	IgG binding	0.00028	-6.677	0.692	0.602	-122.788	0.924	0.161	19864	0
GO:0050840	extracellular matrix binding	0.0021	2.797	1.307	1.477	136.537	0.975	0.025	50840	0		GO:0004117	calmodulin-dependent cyclic-nucleotide phosphodiesterase activity	0.00014	-2.676	4.603	0.301	770.873	0.893	0.069	4117	0		GO:0019239	deaminase activity	0.00105	-1.747	-1.864	1.176	56.4518	0.915	0.075	19239	0		GO:0017069	snRNA binding	0.00049	0.048	0.109	0.845	-150.609	0.962	0.168	17069	0
GO:0042165	neurotransmitter binding	0.00363	1.854	1.201	1.716	170.584	0.974	0.026	42165	0		GO:0047555	3',5'-cyclic-GMP phosphodiesterase activity	0.00063	null	null	0.954	149.701	0.883	0.78	4117	1		GO:0034190	apolipoprotein receptor binding	0.00014	-6.41	-0.72	0.301	301.773	0.914	0.155	34190	0		GO:0003923	GPI-anchor transamidase activity	0.00014	3.468	5.488	0.301	-172.858	0.886	0.175	3923	0
GO:0043176	amine binding	0.00524	1.934	1.028	1.875	169.478	0.974	0.027	43176	0		GO:0004114	3',5'-cyclic-nucleotide phosphodiesterase activity	0.00175	null	null	1.398	46.0994	0.876	0.918	4117	1		GO:0034452	dynactin binding	0.00014	-6.324	-0.693	0.301	238.068	0.923	0.155	34452	0		GO:0042826	histone deacetylase binding	0.00237	-6.987	0.831	1.531	-303.577	0.911	0.186	42826	0
GO:0042562	hormone binding	0.0037	1.915	1.013	1.724	105.137	0.974	0.027	42562	0		GO:0048101	calcium- and calmodulin-regulated 3',5'-cyclic-GMP phosphodiesterase activity	0.00014	null	null	0.301	770.873	0.893	0.714	4117	1		GO:0034186	apolipoprotein A-I binding	0.00021	-6.177	-0.677	0.477	335.429	0.926	0.159	34186	0		GO:0034185	apolipoprotein binding	0.00035	-6.289	0.733	0.699	-111.133	0.927	0.189	34185	0
GO:0051540	metal cluster binding	0.00419	0.982	0.648	1.778	145.246	0.974	0.028	51540	0		GO:0003917	DNA topoisomerase type I activity	0.00028	0.25	-0.182	0.602	193.959	0.912	0.072	3917	0		GO:0017069	snRNA binding	0.00049	0.265	0.532	0.845	174.945	0.966	0.168	17069	0		GO:0045294	alpha-catenin binding	0.00035	-6.408	0.724	0.699	-60.5435	0.927	0.189	45294	0
GO:0008289	lipid binding	0.01886	1.396	0.849	2.431	165.933	0.971	0.032	8289	0		GO:0004332	fructose-bisphosphate aldolase activity	0.00028	1.344	-0.897	0.602	126.004	0.937	0.072	4332	0		GO:0003923	GPI-anchor transamidase activity	0.00014	3.346	-5.65	0.301	86.4288	0.884	0.175	3923	0		GO:0050733	RS domain binding	0.00035	-6.584	0.712	0.699	-68.6174	0.927	0.189	50733	0
GO:0050660	flavin adenine dinucleotide binding	0.00601	1.557	1.04	1.934	165.794	0.961	0.033	50660	0		GO:0016832	aldehyde-lyase activity	0.00042	null	null	0.778	94.5029	0.936	0.701	4332	1		GO:0031683	G-protein beta/gamma-subunit complex binding	0.00098	-6.36	-0.724	1.146	347.334	0.918	0.175	31683	0		GO:0043121	neurotrophin binding	0.00042	-7.077	0.77	0.778	-292.85	0.921	0.191	43121	0
GO:0010181	FMN binding	0.00133	null	null	1.279	118.313	0.946	0.718	50660	1		GO:0004813	alanine-tRNA ligase activity	0.00028	-0.843	0.57	0.602	248.752	0.923	0.072	4813	0		GO:0034185	apolipoprotein binding	0.00035	-6.284	-0.698	0.699	224.296	0.923	0.177	34185	0		GO:0043395	heparan sulfate proteoglycan binding	0.00042	-6.483	0.733	0.778	-139.642	0.923	0.191	43395	0
GO:0051287	NAD binding	0.00384	null	null	1.74	116.371	0.941	0.79	50660	1		GO:0016717	oxidoreductase activity, acting on paired donors, with oxidation of a pair of donors resulting in the reduction of molecular oxygen to two molecules of water	0.00056	-1.85	1.416	0.903	1639.79	0.893	0.075	16717	0		GO:0043121	neurotrophin binding	0.00042	-6.797	-0.746	0.778	73.2125	0.92	0.18	43121	0		GO:0043394	proteoglycan binding	0.00042	null	null	0.778	-139.642	0.923	0.775	43395	1
GO:0050662	coenzyme binding	0.0139	null	null	2.299	107.093	0.959	0.814	50660	1		GO:0032451	demethylase activity	0.00063	1.474	-1.296	0.954	100.406	0.94	0.075	32451	0		GO:0043395	heparan sulfate proteoglycan binding	0.00042	-6.44	-0.718	0.778	151.806	0.919	0.18	43395	0		GO:0043621	protein self-association	0.00056	-7.058	0.773	0.903	-119.395	0.925	0.195	43621	0
GO:0001871	pattern binding	0.0088	2.048	0.911	2.1	107.837	0.972	0.034	1871	0		GO:0031402	sodium ion binding	0.00014	0.358	-0.251	0.301	217.202	0.97	0.144	31402	0		GO:0043394	proteoglycan binding	0.00042	null	null	0.778	151.806	0.919	0.775	43395	1		GO:0070412	R-SMAD binding	0.00056	-6.63	0.751	0.903	-147.927	0.925	0.195	70412	0
GO:0046906	tetrapyrrole binding	0.01313	2.143	0.948	2.274	123.301	0.972	0.036	46906	0		GO:0031403	lithium ion binding	7e-05	null	null	0	55.3549	0.97	0.812	31402	1		GO:0043621	protein self-association	0.00056	-6.966	-0.766	0.903	119.395	0.921	0.183	43621	0		GO:0030544	Hsp70 protein binding	0.00063	-6.708	0.709	0.954	-156.072	0.922	0.197	30544	0
GO:0030246	carbohydrate binding	0.01921	2.234	0.757	2.439	117.463	0.971	0.037	30246	0		GO:0030151	molybdenum ion binding	0.00021	-0.08	0.088	0.477	711.324	0.971	0.148	30151	0		GO:0070412	R-SMAD binding	0.00056	-6.595	-0.733	0.903	147.927	0.921	0.183	70412	0		GO:0051879	Hsp90 protein binding	0.00077	null	null	1.041	-70.0984	0.921	0.711	30544	1
GO:0048037	cofactor binding	0.02025	2.233	1.696	2.462	94.8293	0.971	0.038	48037	0		GO:0043168	anion binding	0.00049	0.283	-0.19	0.845	177.556	0.972	0.156	43168	0		GO:0030544	Hsp70 protein binding	0.00063	-6.7	-0.729	0.954	78.0358	0.92	0.185	30544	0		GO:0004407	histone deacetylase activity	0.00105	3.722	5.798	1.176	-306.883	0.867	0.197	4407	0
GO:0043167	ion binding	0.21342	2.009	1.058	3.485	106.097	0.964	0.054	43167	0		GO:0030274	LIM domain binding	0.00014	6.557	-1	0.301	782.34	0.927	0.16	30274	0		GO:0005070	SH3/SH2 adaptor activity	0.0007	-6.516	-0.741	1	86.4034	0.916	0.186	5070	0		GO:0033558	protein deacetylase activity	0.00105	null	null	1.176	-306.883	0.867	0.972	4407	1
GO:0004117	calmodulin-dependent cyclic-nucleotide phosphodiesterase activity	0.00014	-3.874	4.213	0.301	896.307	0.884	0.069	4117	0		GO:0045513	interleukin-27 binding	0.00014	6.503	-1.008	0.301	308.969	0.933	0.16	45513	0		GO:0030674	protein binding, bridging	0.00314	null	null	1.653	58.6299	0.907	0.872	5070	1		GO:0043140	ATP-dependent 3'-5' DNA helicase activity	0.00014	3.936	5.789	0.301	-150.747	0.863	0.197	43140	0
GO:0047555	3',5'-cyclic-GMP phosphodiesterase activity	0.00063	null	null	0.954	326.636	0.872	0.78	4117	1		GO:0031420	alkali metal ion binding	0.00056	0.194	-0.118	0.903	108.297	0.971	0.161	31420	0		GO:0045502	dynein binding	0.00084	-7.27	-0.795	1.079	111.989	0.919	0.188	45502	0		GO:0043138	3'-5' DNA helicase activity	0.00021	null	null	0.477	-100.498	0.862	0.769	43140	1
GO:0004112	cyclic-nucleotide phosphodiesterase activity	0.00182	null	null	1.415	154.569	0.865	0.78	4117	1		GO:0003785	actin monomer binding	0.00021	6.795	-1.002	0.477	209.17	0.924	0.164	3785	0		GO:0004407	histone deacetylase activity	0.00105	3.51	-5.848	1.176	306.883	0.864	0.197	4407	0		GO:0043139	5'-3' DNA helicase activity	0.00021	null	null	0.477	-148.077	0.862	0.751	43140	1
GO:0004114	3',5'-cyclic-nucleotide phosphodiesterase activity	0.00175	null	null	1.398	164.874	0.863	0.918	4117	1		GO:0031995	insulin-like growth factor II binding	0.00021	6.458	-0.941	0.477	147.974	0.925	0.164	31995	0		GO:0033558	protein deacetylase activity	0.00105	null	null	1.176	306.883	0.864	0.972	4407	1		GO:0004003	ATP-dependent DNA helicase activity	0.00105	null	null	1.176	-85.1097	0.846	0.85	43140	1
GO:0048101	calcium- and calmodulin-regulated 3',5'-cyclic-GMP phosphodiesterase activity	0.00014	null	null	0.301	896.307	0.884	0.714	4117	1		GO:0031994	insulin-like growth factor I binding	0.00049	null	null	0.845	80.0373	0.921	0.778	31995	1		GO:0042826	histone deacetylase binding	0.00237	-6.94	-0.798	1.531	303.577	0.893	0.204	42826	0		GO:0045502	dynein binding	0.00084	-7.521	0.821	1.079	-111.989	0.923	0.201	45502	0
GO:0003917	DNA topoisomerase type I activity	0.00028	0.26	0.39	0.602	309.245	0.921	0.072	3917	0		GO:0051018	protein kinase A binding	0.00028	6.5	-0.934	0.602	174.216	0.932	0.167	51018	0		GO:0005484	SNAP receptor activity	0.00112	-6.91	-0.756	1.204	167.337	0.917	0.206	5484	0		GO:0005484	SNAP receptor activity	0.00112	-6.918	0.776	1.204	-110.779	0.922	0.206	5484	0
GO:0004813	alanine-tRNA ligase activity	0.00028	-0.192	-0.09	0.602	248.752	0.933	0.072	4813	0		GO:0051747	cytosine C-5 DNA demethylase activity	7e-05	-2.267	4.206	0	304.803	0.925	0.168	51747	0		GO:0004013	adenosylhomocysteinase activity	0.00028	3.36	-5.699	0.602	186.605	0.875	0.206	4013	0		GO:0004013	adenosylhomocysteinase activity	0.00028	3.456	5.514	0.602	-186.605	0.877	0.206	4013	0
GO:0016717	oxidoreductase activity, acting on paired donors, with oxidation of a pair of donors resulting in the reduction of molecular oxygen to two molecules of water	0.00056	-2.683	-1.368	0.903	1661.76	0.907	0.075	16717	0		GO:0070411	I-SMAD binding	0.00042	6.575	-0.946	0.778	45.7544	0.931	0.171	70411	0		GO:0016802	trialkylsulfonium hydrolase activity	0.00028	null	null	0.602	186.605	0.875	0.9	4013	1		GO:0016802	trialkylsulfonium hydrolase activity	0.00028	null	null	0.602	-186.605	0.877	0.9	4013	1
GO:0032451	demethylase activity	0.00063	1.279	1.497	0.954	247.003	0.944	0.075	32451	0		GO:0048185	activin binding	0.00049	6.431	-0.942	0.845	768.94	0.925	0.173	48185	0		GO:0051219	phosphoprotein binding	0.0014	-7.681	-0.916	1.301	279.695	0.916	0.209	51219	0		GO:0051219	phosphoprotein binding	0.0014	-7.933	1	1.301	-134.071	0.921	0.209	51219	0
GO:0004016	adenylate cyclase activity	0.0007	0.358	0.542	1	215.442	0.94	0.077	4016	0		GO:0046966	thyroid hormone receptor binding	0.0007	8.052	-1.273	1	435.306	0.912	0.177	46966	0		GO:0002039	p53 binding	0.00147	-6.796	-0.771	1.322	55.0308	0.916	0.21	2039	0		GO:0002039	p53 binding	0.00147	-6.852	0.801	1.322	-55.0308	0.921	0.21	2039	0
GO:0009975	cyclase activity	0.00189	0.36	2.041	1.431	126.027	0.94	0.083	9975	0		GO:0050681	androgen receptor binding	0.00077	null	null	1.041	58.8736	0.911	0.787	46966	1		GO:0019905	syntaxin binding	0.00154	-7.268	-0.807	1.342	234.327	0.916	0.211	19905	0		GO:0019905	syntaxin binding	0.00154	-7.518	0.821	1.342	-36.7335	0.92	0.211	19905	0
GO:0031402	sodium ion binding	0.00014	-1.561	-1.132	0.301	276.364	0.957	0.144	31402	0		GO:0051117	ATPase binding	0.00063	6.672	-0.969	0.954	320.557	0.921	0.18	51117	0		GO:0070053	thrombospondin receptor activity	0.00021	-0.427	1.243	0.477	114.415	0.983	0.214	70053	0		GO:0008239	dipeptidyl-peptidase activity	0.00042	3.68	5.732	0.778	-225.027	0.868	0.212	8239	0
GO:0030955	potassium ion binding	0.00049	null	null	0.845	91.9892	0.954	0.907	31402	1		GO:0004427	inorganic diphosphatase activity	0.00028	-1.386	3.615	0.602	501.599	0.911	0.182	4427	0		GO:0000175	3'-5'-exoribonuclease activity	0.00056	3.611	-6.01	0.903	214.924	0.837	0.216	175	0		GO:0070053	thrombospondin receptor activity	0.00021	-0.334	-1.823	0.477	-152.554	0.968	0.214	70053	0
GO:0031403	lithium ion binding	7e-05	null	null	0	250.989	0.958	0.812	31402	1		GO:0048306	calcium-dependent protein binding	0.00098	7.068	-1.043	1.146	319.984	0.927	0.186	48306	0		GO:0016796	exonuclease activity, active with either ribo- or deoxyribonucleic acids and producing 5'-phosphomonoesters	0.00084	null	null	1.079	156.57	0.835	0.838	175	1		GO:0000175	3'-5'-exoribonuclease activity	0.00056	3.728	5.888	0.903	-214.924	0.835	0.216	175	0
GO:0030151	molybdenum ion binding	0.00021	-1.394	-0.984	0.477	711.324	0.962	0.148	30151	0		GO:0017040	ceramidase activity	0.00021	-1.397	3.493	0.477	108.775	0.916	0.186	17040	0		GO:0004532	exoribonuclease activity	0.00056	null	null	0.903	214.924	0.839	0.761	175	1		GO:0016796	exonuclease activity, active with either ribo- or deoxyribonucleic acids and producing 5'-phosphomonoesters	0.00084	null	null	1.079	-156.57	0.835	0.782	175	1
GO:0043168	anion binding	0.00049	-1.969	-1.413	0.845	259.676	0.962	0.156	43168	0		GO:0045296	cadherin binding	0.00077	6.658	-0.961	1.041	80.8354	0.928	0.187	45296	0		GO:0004529	exodeoxyribonuclease activity	0.00028	null	null	0.602	68.3232	0.846	0.727	175	1		GO:0004532	exoribonuclease activity	0.00056	null	null	0.903	-214.924	0.837	0.761	175	1
GO:0030274	LIM domain binding	0.00014	6.898	0.567	0.301	782.34	0.929	0.16	30274	0		GO:0019103	pyrimidine nucleotide binding	0.00014	-0.058	0.015	0.301	762.423	0.972	0.188	19103	0		GO:0016895	exodeoxyribonuclease activity, producing 5'-phosphomonoesters	0.00028	null	null	0.602	68.3232	0.844	0.903	175	1		GO:0004529	exodeoxyribonuclease activity	0.00028	null	null	0.602	-68.3232	0.845	0.727	175	1
GO:0031420	alkali metal ion binding	0.00056	-1.958	-1.402	0.903	165.226	0.962	0.161	31420	0		GO:0003746	translation elongation factor activity	0.00258	0.679	-0.452	1.568	113.381	0.971	0.196	3746	0		GO:0016896	exoribonuclease activity, producing 5'-phosphomonoesters	0.00056	null	null	0.903	214.924	0.837	0.999	175	1		GO:0016895	exodeoxyribonuclease activity, producing 5'-phosphomonoesters	0.00028	null	null	0.602	-68.3232	0.843	0.903	175	1
GO:0003785	actin monomer binding	0.00021	6.931	0.538	0.477	209.17	0.926	0.164	3785	0		GO:0004198	calcium-dependent cysteine-type endopeptidase activity	0.00126	-2.235	4.261	1.255	64.2793	0.911	0.208	4198	0		GO:0008408	3'-5' exonuclease activity	0.00147	null	null	1.322	178.143	0.829	0.813	175	1		GO:0016896	exoribonuclease activity, producing 5'-phosphomonoesters	0.00056	null	null	0.903	-214.924	0.835	0.999	175	1
GO:0031995	insulin-like growth factor II binding	0.00021	6.855	0.529	0.477	147.974	0.93	0.164	31995	0		GO:0019003	GDP binding	0.00133	-0.103	0.061	1.279	197.614	0.966	0.216	19003	0		GO:0016801	hydrolase activity, acting on ether bonds	0.00063	3.956	-6.172	0.954	144.634	0.873	0.218	16801	0		GO:0008408	3'-5' exonuclease activity	0.00147	null	null	1.322	-79.4121	0.829	0.838	175	1
GO:0019972	interleukin-12 binding	0.00028	6.825	0.541	0.602	447.188	0.93	0.167	19972	0		GO:0032403	protein complex binding	0.00929	8.018	-1.265	2.124	124.979	0.914	0.227	32403	0		GO:0001948	glycoprotein binding	0.00237	-7.803	-0.887	1.531	129.989	0.913	0.219	1948	0		GO:0016801	hydrolase activity, acting on ether bonds	0.00063	4.083	6.14	0.954	-77.8469	0.875	0.218	16801	0
GO:0051018	protein kinase A binding	0.00028	6.838	0.53	0.602	174.216	0.932	0.167	51018	0		GO:0004062	aryl sulfotransferase activity	0.00014	-3.299	-6.082	0.301	158.343	0.9	0.229	4062	0		GO:0034483	heparan sulfate sulfotransferase activity	0.00035	2.355	6.542	0.699	417.626	0.862	0.222	34483	0		GO:0046332	SMAD binding	0.00258	-8.222	1.079	1.568	-93.3021	0.917	0.22	46332	0
GO:0051747	cytosine C-5 DNA demethylase activity	7e-05	-3.616	4.184	0	304.803	0.921	0.168	51747	0		GO:0003912	DNA nucleotidylexotransferase activity	0.00021	-3.44	-6.359	0.477	490.775	0.89	0.234	3912	0		GO:0008146	sulfotransferase activity	0.00321	null	null	1.663	209.302	0.841	0.809	34483	1		GO:0034483	heparan sulfate sulfotransferase activity	0.00035	2.557	-6.698	0.699	-417.626	0.853	0.222	34483	0
GO:0048185	activin binding	0.00049	6.795	0.549	0.845	854.726	0.921	0.173	48185	0		GO:0005518	collagen binding	0.0014	6.591	-0.978	1.301	60.58	0.925	0.235	5518	0		GO:0050694	galactose 3-O-sulfotransferase activity	0.00028	null	null	0.602	150.822	0.864	0.709	34483	1		GO:0008146	sulfotransferase activity	0.00321	null	null	1.663	-81.5926	0.831	0.809	34483	1
GO:0048306	calcium-dependent protein binding	0.00098	7.34	0.617	1.146	549.892	0.926	0.181	48306	0		GO:0050839	cell adhesion molecule binding	0.0014	7.753	-1.225	1.301	48.5012	0.925	0.235	50839	0		GO:0001733	galactosylceramide sulfotransferase activity	0.00028	null	null	0.602	150.822	0.864	0.709	34483	1		GO:0050694	galactose 3-O-sulfotransferase activity	0.00028	null	null	0.602	-65.7583	0.854	0.709	34483	1
GO:0047429	nucleoside-triphosphate diphosphatase activity	0.00035	-3.703	4.262	0.699	612.71	0.902	0.184	47429	0		GO:0001875	lipopolysaccharide receptor activity	0.0007	-1.972	-3.413	1	210.256	0.952	0.237	1875	0		GO:0009881	photoreceptor activity	0.00042	-0.551	1.352	0.778	170.608	0.982	0.223	9881	0		GO:0001733	galactosylceramide sulfotransferase activity	0.00028	null	null	0.602	-65.7583	0.854	0.709	34483	1
GO:0001968	fibronectin binding	0.00063	7.37	0.723	0.954	205.07	0.928	0.185	1968	0		GO:0004084	branched-chain-amino-acid transaminase activity	0.00028	-3.317	-6.111	0.602	273.591	0.901	0.239	4084	0		GO:0019213	deacetylase activity	0.00126	3.96	-6.189	1.255	306.883	0.867	0.229	19213	0		GO:0009881	photoreceptor activity	0.00042	-0.362	-1.98	0.778	-170.608	0.967	0.223	9881	0
GO:0051117	ATPase binding	0.00063	6.942	0.58	0.954	320.557	0.923	0.185	51117	0		GO:0004366	glycerol-3-phosphate O-acyltransferase activity	0.00028	-3.489	-6.45	0.602	943.747	0.883	0.239	4366	0		GO:0004311	farnesyltranstransferase activity	0.00028	2.29	6.523	0.602	142.738	0.857	0.232	4311	0		GO:0015026	coreceptor activity	0.00035	-0.362	-4.029	0.699	-49.5116	0.967	0.226	15026	0
GO:0043560	insulin receptor substrate binding	0.0007	7.248	0.621	1	101.773	0.928	0.186	43560	0		GO:0003841	1-acylglycerol-3-phosphate O-acyltransferase activity	0.00028	null	null	0.602	128.062	0.883	0.765	4366	1		GO:0004659	prenyltransferase activity	0.00119	null	null	1.23	69.2256	0.846	0.729	4311	1		GO:0019213	deacetylase activity	0.00126	4.18	6.198	1.255	-306.883	0.869	0.229	19213	0
GO:0046966	thyroid hormone receptor binding	0.0007	8.164	0.754	1	547.303	0.911	0.186	46966	0		GO:0016411	acylglycerol O-acyltransferase activity	0.00077	null	null	1.041	64.0311	0.876	0.816	4366	1		GO:0004660	protein farnesyltransferase activity	0.00021	null	null	0.477	84.7441	0.859	0.808	4311	1		GO:0008095	inositol-1,4,5-trisphosphate receptor activity	0.00042	-0.492	-3.211	0.778	-152.632	0.967	0.229	8095	0
GO:0035257	nuclear hormone receptor binding	0.00335	null	null	1.681	190.979	0.901	0.828	46966	1		GO:0030551	cyclic nucleotide binding	0.00091	0.006	0.01	1.114	62.4591	0.97	0.24	30551	0		GO:0004663	Rab geranylgeranyltransferase activity	0.00035	null	null	0.699	76.058	0.854	0.897	4311	1		GO:0004311	farnesyltranstransferase activity	0.00028	2.479	-6.697	0.602	-142.738	0.842	0.232	4311	0
GO:0045296	cadherin binding	0.00077	6.928	0.574	1.041	90.926	0.927	0.187	45296	0		GO:0008175	tRNA methyltransferase activity	0.00063	-3.619	-6.646	0.954	83.7412	0.894	0.252	8175	0		GO:0004364	glutathione transferase activity	0.0021	null	null	1.477	59.7513	0.84	0.842	4311	1		GO:0004659	prenyltransferase activity	0.00119	null	null	1.23	-64.6885	0.831	0.729	4311	1
GO:0019103	pyrimidine nucleotide binding	0.00014	-0.503	-0.344	0.301	762.423	0.962	0.188	19103	0		GO:0042393	histone binding	0.00328	6.954	-1.022	1.672	48.173	0.921	0.254	42393	0		GO:0008318	protein prenyltransferase activity	0.00063	null	null	0.954	70.2942	0.849	0.865	4311	1		GO:0004660	protein farnesyltransferase activity	0.00021	null	null	0.477	-112.992	0.844	0.808	4311	1
GO:0003746	translation elongation factor activity	0.00258	0.533	0.321	1.568	301.252	0.965	0.196	3746	0		GO:0008329	pattern recognition receptor activity	0.00133	-1.57	-2.432	1.279	109.862	0.965	0.256	8329	0		GO:0004690	cyclic nucleotide-dependent protein kinase activity	0.00028	2.756	7.128	0.602	312.894	0.86	0.232	4690	0		GO:0004663	Rab geranylgeranyltransferase activity	0.00035	null	null	0.699	-60.1784	0.839	0.897	4311	1
GO:0019003	GDP binding	0.00133	-0.823	-0.496	1.279	197.614	0.948	0.216	19003	0		GO:0030552	cAMP binding	0.00035	-0.085	0.037	0.699	103.426	0.967	0.258	30552	0		GO:0004177	aminopeptidase activity	0.00168	4.074	-6.396	1.38	150.081	0.841	0.237	4177	0		GO:0004661	protein geranylgeranyltransferase activity	0.00049	null	null	0.845	-40.1189	0.836	0.946	4311	1
GO:0031072	heat shock protein binding	0.00552	7.665	0.673	1.898	264.451	0.915	0.218	31072	0		GO:0030553	cGMP binding	0.00056	null	null	0.903	50.9507	0.963	0.906	30552	1		GO:0004185	serine-type carboxypeptidase activity	0.00042	null	null	0.778	54.7606	0.854	0.732	4177	1		GO:0004364	glutathione transferase activity	0.0021	null	null	1.477	-47.2297	0.825	0.842	4311	1
GO:0001540	beta-amyloid binding	0.00119	7.083	0.603	1.23	233.291	0.925	0.221	1540	0		GO:0005516	calmodulin binding	0.00419	6.776	-1.02	1.778	99.0343	0.919	0.26	5516	0		GO:0004180	carboxypeptidase activity	0.00223	null	null	1.505	70.3827	0.838	0.852	4177	1		GO:0008318	protein prenyltransferase activity	0.00063	null	null	0.954	-62.3543	0.834	0.865	4311	1
GO:0016803	ether hydrolase activity	0.00035	-3.721	4.269	0.699	116.234	0.913	0.227	16803	0		GO:0005507	copper ion binding	0.00677	-0.29	0.168	1.987	159.232	0.965	0.263	5507	0		GO:0008235	metalloexopeptidase activity	0.0023	null	null	1.519	76.2691	0.836	0.832	4177	1		GO:0004690	cyclic nucleotide-dependent protein kinase activity	0.00028	2.881	-7.307	0.602	-312.894	0.845	0.232	4690	0
GO:0016811	hydrolase activity, acting on carbon-nitrogen (but not peptide) bonds, in linear amides	0.00328	-4.043	4.344	1.672	248.649	0.898	0.227	16811	0		GO:0008022	protein C-terminus binding	0.00503	8.251	-1.3	1.857	58.6569	0.918	0.265	8022	0		GO:0008239	dipeptidyl-peptidase activity	0.00042	null	null	0.778	56.2567	0.854	0.732	4177	1		GO:0004379	glycylpeptide N-tetradecanoyltransferase activity	0.00042	2.538	-6.853	0.778	-126.02	0.836	0.238	4379	0
GO:0000149	SNARE binding	0.00182	7.037	0.609	1.415	170.383	0.922	0.229	149	0		GO:0031072	heat shock protein binding	0.00552	7.33	-1.107	1.898	80.2674	0.918	0.267	31072	0		GO:0070008	serine-type exopeptidase activity	0.00042	null	null	0.778	54.7606	0.854	0.732	4177	1		GO:0008080	N-acetyltransferase activity	0.00293	null	null	1.623	-51.4847	0.814	0.913	4379	1
GO:0001875	lipopolysaccharide receptor activity	0.0007	-1.451	-4.236	1	429.658	0.949	0.237	1875	0		GO:0043531	ADP binding	0.00049	-0.071	0.058	0.845	54.8957	0.97	0.276	43531	0		GO:0003886	DNA (cytosine-5-)-methyltransferase activity	0.00042	2.327	6.638	0.778	153.043	0.853	0.238	3886	0		GO:0004402	histone acetyltransferase activity	0.00154	null	null	1.342	-63.7459	0.822	0.765	4379	1
GO:0004084	branched-chain-amino-acid transaminase activity	0.00028	-1.615	-6.442	0.602	273.591	0.912	0.239	4084	0		GO:0016769	transferase activity, transferring nitrogenous groups	0.00286	-4.035	-7.082	1.613	47.0648	0.885	0.283	16769	0		GO:0016279	protein-lysine N-methyltransferase activity	0.00168	null	null	1.38	122.504	0.837	0.995	3886	1		GO:0004468	lysine N-acetyltransferase activity	0.00154	null	null	1.342	-63.7459	0.822	0.898	4379	1
GO:0004366	glycerol-3-phosphate O-acyltransferase activity	0.00028	-1.703	-6.783	0.602	943.747	0.901	0.239	4366	0		GO:0015464	acetylcholine receptor activity	0.00112	-2.023	-3.379	1.204	494.055	0.926	0.292	15464	0		GO:0016278	lysine N-methyltransferase activity	0.00168	null	null	1.38	122.504	0.838	0.923	3886	1		GO:0003886	DNA (cytosine-5-)-methyltransferase activity	0.00042	2.483	-6.746	0.778	-111.055	0.841	0.241	3886	0
GO:0003841	1-acylglycerol-3-phosphate O-acyltransferase activity	0.00028	null	null	0.602	96.0466	0.901	0.765	4366	1		GO:0042166	acetylcholine binding	0.00126	null	null	1.255	494.055	0.953	0.831	15464	1		GO:0042054	histone methyltransferase activity	0.00196	null	null	1.447	86.4846	0.837	0.922	3886	1		GO:0016273	arginine N-methyltransferase activity	0.00028	null	null	0.602	-37.0622	0.842	0.809	3886	1
GO:0004792	thiosulfate sulfurtransferase activity	0.00028	-1.828	-6.714	0.602	217.51	0.908	0.239	4792	0		GO:0035240	dopamine binding	0.00049	null	null	0.845	181.541	0.963	0.725	15464	1		GO:0018024	histone-lysine N-methyltransferase activity	0.00161	null	null	1.362	122.504	0.837	0.749	3886	1		GO:0016274	protein-arginine N-methyltransferase activity	0.00028	null	null	0.602	-37.0622	0.84	1	3886	1
GO:0016783	sulfurtransferase activity	0.00049	null	null	0.845	145.007	0.904	0.701	4792	1		GO:0004952	dopamine receptor activity	0.00021	null	null	0.477	181.541	0.92	0.836	15464	1		GO:0003678	DNA helicase activity	0.00147	3.584	-5.941	1.322	137.953	0.844	0.24	3678	0		GO:0016279	protein-lysine N-methyltransferase activity	0.00168	null	null	1.38	-86.8975	0.822	0.995	3886	1
GO:0030551	cyclic nucleotide binding	0.00091	-0.826	-0.548	1.114	124.333	0.957	0.24	30551	0		GO:0016594	glycine binding	0.00035	null	null	0.699	150.379	0.958	0.708	15464	1		GO:0019955	cytokine binding	0.00782	-8.019	-0.892	2.049	134.536	0.905	0.242	19955	0		GO:0016278	lysine N-methyltransferase activity	0.00168	null	null	1.38	-86.8975	0.824	0.923	3886	1
GO:0042393	histone binding	0.00328	7.278	0.64	1.672	117.683	0.919	0.242	42393	0		GO:0004983	neuropeptide Y receptor activity	0.00056	null	null	0.903	49.3212	0.916	0.789	15464	1		GO:0030165	PDZ domain binding	0.00244	-7.057	-0.787	1.544	82.002	0.91	0.243	30165	0		GO:0008469	histone-arginine N-methyltransferase activity	0.00028	null	null	0.602	-37.0622	0.84	0.852	3886	1
GO:0005516	calmodulin binding	0.00419	7.092	0.617	1.778	161.595	0.917	0.247	5516	0		GO:0030594	neurotransmitter receptor activity	0.00349	null	null	1.699	130.619	0.933	0.908	15464	1		GO:0046332	SMAD binding	0.00258	-7.984	-0.949	1.568	108.93	0.912	0.244	46332	0		GO:0042054	histone methyltransferase activity	0.00196	null	null	1.447	-62.747	0.824	0.922	3886	1
GO:0004198	calcium-dependent cysteine-type endopeptidase activity	0.00126	-3.727	4.248	1.255	109.516	0.898	0.25	4198	0		GO:0004074	biliverdin reductase activity	0.00014	-1.109	0.952	0.301	137.478	0.911	0.293	4074	0		GO:0000403	Y-form DNA binding	0.00042	0.396	0.697	0.778	369.818	0.957	0.253	403	0		GO:0018024	histone-lysine N-methyltransferase activity	0.00161	null	null	1.362	-86.8975	0.823	0.749	3886	1
GO:0008022	protein C-terminus binding	0.00503	8.385	0.831	1.857	124.718	0.916	0.252	8022	0		GO:0019904	protein domain specific binding	0.01481	7.932	-1.252	2.326	50.7616	0.911	0.297	19904	0		GO:0047485	protein N-terminus binding	0.00384	-7.895	-0.89	1.74	114.475	0.91	0.254	47485	0		GO:0019955	cytokine binding	0.00782	-8.194	0.926	2.049	-56.3247	0.911	0.244	19955	0
GO:0008329	pattern recognition receptor activity	0.00133	-0.689	-3.293	1.279	219.563	0.964	0.256	8329	0		GO:0005509	calcium ion binding	0.03806	-0.298	0.181	2.736	68.7803	0.962	0.298	5509	0		GO:0016755	transferase activity, transferring amino-acyl groups	0.00119	2.582	7.008	1.23	125.348	0.841	0.258	16755	0		GO:0016744	transferase activity, transferring aldehyde or ketonic groups	0.00056	2.533	-6.799	0.903	-76.8391	0.856	0.245	16744	0
GO:0000155	two-component sensor activity	0.00084	-2.04	-6.666	1.079	255.767	0.867	0.257	155	0		GO:0051184	cofactor transporter activity	0.00035	-1.531	6.478	0.699	127.508	0.886	0.298	51184	0		GO:0019838	growth factor binding	0.0067	-7.353	-0.837	1.982	86.883	0.906	0.268	19838	0		GO:0030674	protein binding, bridging	0.00314	-6.831	0.825	1.653	-26.6348	0.916	0.249	30674	0
GO:0004673	protein histidine kinase activity	0.00091	null	null	1.114	255.767	0.89	0.955	155	1		GO:0005041	low-density lipoprotein receptor activity	0.00063	-1.574	-2.405	0.954	50.8316	0.941	0.3	5041	0		GO:0001619	lysosphingolipid and lysophosphatidic acid receptor activity	0.00049	-0.873	2.403	0.845	123.735	0.98	0.269	1619	0		GO:0000403	Y-form DNA binding	0.00042	0.055	0.256	0.778	-369.818	0.957	0.253	403	0
GO:0030552	cAMP binding	0.00035	-0.866	-0.572	0.699	124.965	0.954	0.258	30552	0		GO:0030228	lipoprotein particle receptor activity	0.0007	null	null	1	50.8316	0.94	0.884	5041	1		GO:0051082	unfolded protein binding	0.00719	-7.002	-0.805	2.013	114.516	0.905	0.27	51082	0		GO:0003688	DNA replication origin binding	0.00014	0.12	-0.006	0.301	-97.6717	0.966	0.253	3688	0
GO:0030553	cGMP binding	0.00056	null	null	0.903	123.192	0.947	0.906	30552	1		GO:0030169	low-density lipoprotein particle binding	0.00119	null	null	1.23	49.6667	0.968	0.924	5041	1		GO:0003920	GMP reductase activity	0.00014	1.576	0.703	0.301	107.881	0.888	0.281	3920	0		GO:0047485	protein N-terminus binding	0.00384	-8.171	0.923	1.74	-41.2568	0.915	0.254	47485	0
GO:0005507	copper ion binding	0.00677	-0.875	-0.644	1.987	233.683	0.952	0.263	5507	0		GO:0004128	cytochrome-b5 reductase activity	0.00021	-2.464	1.788	0.477	101.882	0.91	0.301	4128	0		GO:0016713	oxidoreductase activity, acting on paired donors, with incorporation or reduction of molecular oxygen, reduced iron-sulfur protein as one donor, and incorporation of one atom of oxygen	0.00021	2.397	1.311	0.477	263.345	0.883	0.288	16713	0		GO:0003723	RNA binding	0.04023	0.213	0.06	2.76	-38.6888	0.958	0.256	3723	0
GO:0032403	protein complex binding	0.00929	8.209	0.764	2.124	202.312	0.912	0.267	32403	0		GO:0004450	isocitrate dehydrogenase (NADP+) activity	0.00021	-1.489	1.196	0.477	417.374	0.903	0.301	4450	0		GO:0004322	ferroxidase activity	0.00028	2.475	1.409	0.602	115.281	0.882	0.293	4322	0		GO:0001619	lysosphingolipid and lysophosphatidic acid receptor activity	0.00049	-0.459	-2.876	0.845	-123.735	0.961	0.269	1619	0
GO:0015464	acetylcholine receptor activity	0.00112	-1.441	-4.22	1.204	507.404	0.929	0.292	15464	0		GO:0004449	isocitrate dehydrogenase (NAD+) activity	0.00063	null	null	0.954	186.948	0.896	0.894	4450	1		GO:0016724	oxidoreductase activity, oxidizing metal ions, oxygen as acceptor	0.00028	null	null	0.602	115.281	0.882	0.931	4322	1		GO:0051082	unfolded protein binding	0.00719	-7.137	0.859	2.013	-27.1025	0.911	0.27	51082	0
GO:0042166	acetylcholine binding	0.00126	null	null	1.255	507.404	0.958	0.831	15464	1		GO:0004938	alpha2-adrenergic receptor activity	0.00021	-1.822	-2.901	0.477	232.284	0.951	0.303	4938	0		GO:0008270	zinc ion binding	0.10182	-1.087	-0.261	3.164	80.9907	0.971	0.299	8270	0		GO:0003920	GMP reductase activity	0.00014	1.602	-0.636	0.301	-143.842	0.881	0.281	3920	0
GO:0035240	dopamine binding	0.00049	null	null	0.845	181.541	0.965	0.725	15464	1		GO:0004939	beta-adrenergic receptor activity	0.00035	null	null	0.699	67.2023	0.95	0.912	4938	1		GO:0004365	glyceraldehyde-3-phosphate dehydrogenase (NAD+) (phosphorylating) activity	0.00056	2.086	1.227	0.903	330.947	0.875	0.306	4365	0		GO:0005487	nucleocytoplasmic transporter activity	0.00021	1.109	-1.022	0.477	-66.2772	0.955	0.283	5487	0
GO:0004952	dopamine receptor activity	0.00021	null	null	0.477	181.541	0.923	0.836	15464	1		GO:0004935	adrenergic receptor activity	0.0007	null	null	1	110.338	0.949	0.778	4938	1		GO:0008943	glyceraldehyde-3-phosphate dehydrogenase activity	0.00056	null	null	0.903	330.947	0.875	0.813	4365	1		GO:0016713	oxidoreductase activity, acting on paired donors, with incorporation or reduction of molecular oxygen, reduced iron-sulfur protein as one donor, and incorporation of one atom of oxygen	0.00021	2.481	-0.863	0.477	-263.345	0.873	0.288	16713	0
GO:0030594	neurotransmitter receptor activity	0.00349	null	null	1.699	170.584	0.932	0.908	15464	1		GO:0004936	alpha-adrenergic receptor activity	0.00035	null	null	0.699	154.856	0.95	0.884	4938	1		GO:0004029	aldehyde dehydrogenase (NAD) activity	0.00035	null	null	0.699	65.2132	0.879	0.788	4365	1		GO:0016765	transferase activity, transferring alkyl or aryl (other than methyl) groups	0.00426	3.328	-7.271	1.785	-27.8605	0.836	0.289	16765	0
GO:0016782	transferase activity, transferring sulfur-containing groups	0.00384	-2.63	-7.26	1.74	224.541	0.896	0.296	16782	0		GO:0016155	formyltetrahydrofolate dehydrogenase activity	0.00028	-2.214	1.632	0.602	123.949	0.91	0.306	16155	0		GO:0016765	transferase activity, transferring alkyl or aryl (other than methyl) groups	0.00426	3.452	6.837	1.785	78.3628	0.846	0.307	16765	0		GO:0004322	ferroxidase activity	0.00028	2.473	-0.807	0.602	-153.708	0.874	0.293	4322	0
GO:0019904	protein domain specific binding	0.01481	8.219	0.764	2.326	164.39	0.908	0.297	19904	0		GO:0004030	aldehyde dehydrogenase [NAD(P)+] activity	0.00035	-1.094	0.941	0.699	358.836	0.908	0.311	4030	0		GO:0008113	peptide-methionine-(S)-S-oxide reductase activity	0.00035	2.329	1.25	0.699	68.771	0.881	0.311	8113	0		GO:0016724	oxidoreductase activity, oxidizing metal ions, oxygen as acceptor	0.00028	null	null	0.602	-153.708	0.874	0.931	4322	1
GO:0005509	calcium ion binding	0.03806	-0.896	-0.663	2.736	141.157	0.946	0.298	5509	0		GO:0016670	oxidoreductase activity, acting on a sulfur group of donors, oxygen as acceptor	0.00035	-2.267	1.648	0.699	145.202	0.908	0.311	16670	0		GO:0015035	protein disulfide oxidoreductase activity	0.00182	null	null	1.415	59.1301	0.869	0.793	8113	1		GO:0043125	ErbB-3 class receptor binding	0.00014	-7.4	0.884	0.301	-81.218	0.915	0.301	43125	0
GO:0051184	cofactor transporter activity	0.00035	-1.945	6.613	0.699	95.6308	0.878	0.298	51184	0		GO:0016721	oxidoreductase activity, acting on superoxide radicals as acceptor	0.00042	-1.764	1.359	0.778	100.839	0.907	0.314	16721	0		GO:0019899	enzyme binding	0.02807	-7.922	-0.892	2.604	111.284	0.894	0.314	19899	0		GO:0004365	glyceraldehyde-3-phosphate dehydrogenase (NAD+) (phosphorylating) activity	0.00056	2.169	-0.807	0.903	-330.947	0.862	0.306	4365	0
GO:0004450	isocitrate dehydrogenase (NADP+) activity	0.00021	-1.443	-0.821	0.477	417.374	0.916	0.301	4450	0		GO:0016725	oxidoreductase activity, acting on CH or CH2 groups	0.00049	-2.215	1.637	0.845	692.046	0.907	0.318	16725	0		GO:0016679	oxidoreductase activity, acting on diphenols and related substances as donors	0.00042	3.034	1.786	0.778	55.6852	0.882	0.314	16679	0		GO:0003863	3-methyl-2-oxobutanoate dehydrogenase (2-methylpropanoyl-transferring) activity	0.00014	null	null	0.301	-100.161	0.873	0.714	4365	1
GO:0004449	isocitrate dehydrogenase (NAD+) activity	0.00063	null	null	0.954	186.948	0.91	0.894	4450	1		GO:0000036	acyl carrier activity	0.00042	-1.617	6.577	0.778	82.6327	0.882	0.33	36	0		GO:0016722	oxidoreductase activity, oxidizing metal ions	0.00049	2.275	1.21	0.845	76.8542	0.881	0.318	16722	0		GO:0016624	oxidoreductase activity, acting on the aldehyde or oxo group of donors, disulfide as acceptor	0.0007	null	null	1	-40.0644	0.861	0.791	4365	1
GO:0004938	alpha2-adrenergic receptor activity	0.00021	-1.171	-3.717	0.477	232.284	0.95	0.303	4938	0		GO:0016500	protein-hormone receptor activity	0.00091	-1.61	-2.367	1.114	322.885	0.959	0.333	16500	0		GO:0004033	aldo-keto reductase (NADP) activity	0.00056	1.276	0.548	0.903	171.596	0.873	0.32	4033	0		GO:0008943	glyceraldehyde-3-phosphate dehydrogenase activity	0.00056	null	null	0.903	-330.947	0.862	0.813	4365	1
GO:0004939	beta-adrenergic receptor activity	0.00035	null	null	0.699	137.914	0.949	0.912	4938	1		GO:0015198	oligopeptide transporter activity	0.00049	-1.592	6.604	0.845	187.542	0.869	0.333	15198	0		GO:0046982	protein heterodimerization activity	0.01082	-8.233	-0.934	2.19	108.922	0.902	0.326	46982	0		GO:0004029	aldehyde dehydrogenase (NAD) activity	0.00035	null	null	0.699	-130.427	0.866	0.788	4365	1
GO:0004935	adrenergic receptor activity	0.0007	null	null	1	145.694	0.949	0.778	4938	1		GO:0015322	secondary active oligopeptide transmembrane transporter activity	0.00028	null	null	0.602	187.542	0.844	0.931	15198	1		GO:0017127	cholesterol transporter activity	0.00077	1.428	-1.412	1.041	239.542	0.937	0.335	17127	0		GO:0016502	nucleotide receptor activity	0.00203	-0.423	-2.979	1.462	-28.3015	0.96	0.308	16502	0
GO:0004936	alpha-adrenergic receptor activity	0.00035	null	null	0.699	154.856	0.949	0.884	4938	1		GO:0005427	proton-dependent oligopeptide secondary active transmembrane transporter activity	0.00028	null	null	0.602	187.542	0.844	0.919	15198	1		GO:0015248	sterol transporter activity	0.00077	null	null	1.041	239.542	0.937	0.841	17127	1		GO:0070653	high-density lipoprotein particle receptor binding	0.00021	-7.669	0.87	0.477	-268.243	0.907	0.308	70653	0
GO:0000287	magnesium ion binding	0.0081	-2.375	-1.748	2.064	102.905	0.953	0.305	287	0		GO:0004602	glutathione peroxidase activity	0.00098	-2.693	1.954	1.146	619.754	0.897	0.333	4602	0		GO:0005548	phospholipid transporter activity	0.00077	null	null	1.041	169.16	0.937	0.841	17127	1		GO:0050750	low-density lipoprotein particle receptor binding	0.0007	null	null	1	-164.128	0.9	0.906	70653	1
GO:0008134	transcription factor binding	0.01271	8.255	0.771	2.26	104.229	0.909	0.308	8134	0		GO:0004601	peroxidase activity	0.00251	null	null	1.556	154.244	0.891	0.925	4602	1		GO:0016780	phosphotransferase activity, for other substituted phosphate groups	0.00063	2.849	7.269	0.954	132.049	0.857	0.336	16780	0		GO:0070326	very-low-density lipoprotein particle receptor binding	0.00028	null	null	0.602	-179.881	0.905	0.84	70653	1
GO:0017171	serine hydrolase activity	0.01369	-4.142	3.337	2.292	96.5669	0.886	0.31	17171	0		GO:0004784	superoxide dismutase activity	0.00042	null	null	0.778	100.839	0.903	0.748	4602	1		GO:0046965	retinoid X receptor binding	0.00105	-7.806	-0.876	1.176	251.464	0.895	0.34	46965	0		GO:0003684	damaged DNA binding	0.00293	0.188	0.024	1.623	-39.1349	0.96	0.31	3684	0
GO:0004030	aldehyde dehydrogenase [NAD(P)+] activity	0.00035	-1.001	-0.569	0.699	442.63	0.918	0.311	4030	0		GO:0008092	cytoskeletal protein binding	0.02528	7.686	-1.177	2.559	46.5745	0.907	0.335	8092	0		GO:0042974	retinoic acid receptor binding	0.00112	null	null	1.204	251.464	0.895	0.832	46965	1		GO:0008113	peptide-methionine-(S)-S-oxide reductase activity	0.00035	2.394	-0.828	0.699	-68.771	0.869	0.311	8113	0
GO:0016620	oxidoreductase activity, acting on the aldehyde or oxo group of donors, NAD or NADP as acceptor	0.00223	null	null	1.505	136.892	0.907	0.83	4030	1		GO:0000155	two-component sensor activity	0.00084	-3.556	-6.072	1.079	220.213	0.855	0.336	155	0		GO:0035258	steroid hormone receptor binding	0.0014	null	null	1.301	94.5435	0.893	0.849	46965	1		GO:0015035	protein disulfide oxidoreductase activity	0.00182	null	null	1.415	-59.1301	0.855	0.793	8113	1
GO:0016670	oxidoreductase activity, acting on a sulfur group of donors, oxygen as acceptor	0.00035	-3.062	-1.701	0.699	145.202	0.92	0.311	16670	0		GO:0004673	protein histidine kinase activity	0.00091	null	null	1.114	220.213	0.877	0.955	155	1		GO:0035259	glucocorticoid receptor binding	0.00035	null	null	0.699	195.32	0.902	0.766	46965	1		GO:0015036	disulfide oxidoreductase activity	0.00196	null	null	1.447	-41.391	0.854	0.902	8113	1
GO:0030145	manganese ion binding	0.00168	-1.481	-1.023	1.38	121.243	0.957	0.311	30145	0		GO:0000156	two-component response regulator activity	0.04451	-1.695	-2.595	2.804	77.3006	0.958	0.339	156	0		GO:0003995	acyl-CoA dehydrogenase activity	0.00133	1.603	0.489	1.279	193.964	0.867	0.34	3995	0		GO:0016671	oxidoreductase activity, acting on a sulfur group of donors, disulfide as acceptor	0.00049	null	null	0.845	-45.8474	0.866	0.812	8113	1
GO:0016725	oxidoreductase activity, acting on CH or CH2 groups	0.00049	-2.955	-1.478	0.845	1346.5	0.919	0.318	16725	0		GO:0005143	interleukin-12 receptor binding	0.00021	7.489	-1.195	0.477	188.443	0.914	0.34	5143	0		GO:0047522	15-oxoprostaglandin 13-oxidase activity	0.00014	null	null	0.301	84.3885	0.884	0.708	3995	1		GO:0005123	death receptor binding	0.00021	-7.659	0.864	0.477	-176.537	0.912	0.316	5123	0
GO:0004890	GABA-A receptor activity	0.0014	-1.052	-3.701	1.301	136.055	0.96	0.318	4890	0		GO:0004749	ribose phosphate diphosphokinase activity	0.00028	-3.813	-6.974	0.602	155.201	0.891	0.343	4749	0		GO:0016634	oxidoreductase activity, acting on the CH-CH group of donors, oxygen as acceptor	0.00084	null	null	1.079	161.69	0.871	0.8	3995	1		GO:0016722	oxidoreductase activity, oxidizing metal ions	0.00049	2.331	-0.818	0.845	-102.472	0.873	0.318	16722	0
GO:0016917	GABA receptor activity	0.00161	-0.755	-3.49	1.362	136.055	0.96	0.327	16917	0		GO:0016778	diphosphotransferase activity	0.00035	-3.881	-7.11	0.699	116.4	0.89	0.348	16778	0		GO:0003997	acyl-CoA oxidase activity	0.00035	null	null	0.699	137.977	0.877	0.752	3995	1		GO:0004033	aldo-keto reductase (NADP) activity	0.00056	1.257	-0.437	0.903	-171.596	0.865	0.32	4033	0
GO:0042803	protein homodimerization activity	0.02249	7.157	0.666	2.508	146.309	0.905	0.33	42803	0		GO:0051183	vitamin transporter activity	0.0007	-1.585	6.647	1	232.487	0.868	0.351	51183	0		GO:0004652	polynucleotide adenylyltransferase activity	0.00035	2.838	7.262	0.699	77.502	0.857	0.341	4652	0		GO:0004652	polynucleotide adenylyltransferase activity	0.00035	2.958	-7.387	0.699	-103.336	0.849	0.324	4652	0
GO:0016500	protein-hormone receptor activity	0.00091	-0.632	-3.333	1.114	322.885	0.959	0.333	16500	0		GO:0005372	water transmembrane transporter activity	0.00049	-1.651	6.689	0.845	48.9544	0.869	0.351	5372	0		GO:0004111	creatine kinase activity	0.00028	2.788	7.141	0.602	127.344	0.862	0.342	4111	0		GO:0017127	cholesterol transporter activity	0.00077	1.179	-1.007	1.041	-239.542	0.941	0.335	17127	0
GO:0004602	glutathione peroxidase activity	0.00098	-3.698	-1.641	1.146	649.142	0.912	0.333	4602	0		GO:0046875	ephrin receptor binding	0.00035	7.396	-1.125	0.699	82.3461	0.918	0.351	46875	0		GO:0004977	melanocortin receptor activity	0.00119	-0.92	2.5	1.23	72.145	0.962	0.343	4977	0		GO:0015248	sterol transporter activity	0.00077	null	null	1.041	-239.542	0.941	0.841	17127	1
GO:0004601	peroxidase activity	0.00251	null	null	1.556	162.407	0.906	0.925	4602	1		GO:0016774	phosphotransferase activity, carboxyl group as acceptor	0.00042	-3.923	-7.171	0.778	57.1685	0.889	0.352	16774	0		GO:0008519	ammonium transmembrane transporter activity	0.00049	2.818	-2.654	0.845	242.796	0.936	0.343	8519	0		GO:0017089	glycolipid transporter activity	0.00028	null	null	0.602	-71.1048	0.944	0.785	17127	1
GO:0003912	DNA nucleotidylexotransferase activity	0.00021	-1.668	-6.838	0.477	122.694	0.899	0.336	3912	0		GO:0047429	nucleoside-triphosphate diphosphatase activity	0.00035	-2.176	4.282	0.699	419.561	0.91	0.361	47429	0		GO:0010851	cyclase regulator activity	0.00014	0.627	0.44	0.301	105.943	0.952	0.347	10851	0		GO:0005548	phospholipid transporter activity	0.00077	null	null	1.041	-30.3639	0.941	0.841	17127	1
GO:0005143	interleukin-12 receptor binding	0.00021	7.546	0.745	0.477	429.495	0.916	0.34	5143	0		GO:0022884	macromolecule transmembrane transporter activity	0.00084	-1.65	6.801	1.079	80.464	0.864	0.364	22884	0		GO:0030235	nitric-oxide synthase regulator activity	0.00028	1.277	1.148	0.602	276.34	0.95	0.347	30235	0		GO:0003995	acyl-CoA dehydrogenase activity	0.00133	1.637	-0.672	1.279	-193.964	0.852	0.34	3995	0
GO:0004749	ribose phosphate diphosphokinase activity	0.00028	-2.11	-7.313	0.602	116.4	0.904	0.343	4749	0		GO:0005338	nucleotide-sugar transmembrane transporter activity	0.00056	-2.073	6.885	0.903	54.8794	0.867	0.367	5338	0		GO:0008514	organic anion transmembrane transporter activity	0.00021	2.67	-2.576	0.477	91.0013	0.942	0.349	8514	0		GO:0047522	15-oxoprostaglandin 13-oxidase activity	0.00014	null	null	0.301	-84.3885	0.87	0.708	3995	1
GO:0015238	drug transmembrane transporter activity	0.00084	-2.363	7.036	1.079	327.055	0.857	0.355	15238	0		GO:0016684	oxidoreductase activity, acting on peroxide as acceptor	0.00251	-2.467	1.917	1.556	154.244	0.896	0.372	16684	0		GO:0005123	death receptor binding	0.00021	-7.268	-0.812	0.477	203.566	0.912	0.349	5123	0		GO:0016634	oxidoreductase activity, acting on the CH-CH group of donors, oxygen as acceptor	0.00084	null	null	1.079	-45.2749	0.856	0.8	3995	1
GO:0005338	nucleotide-sugar transmembrane transporter activity	0.00056	-2.562	7.233	0.903	145.236	0.858	0.358	5338	0		GO:0008227	G-protein coupled amine receptor activity	0.00216	-1.785	-2.728	1.491	72.571	0.957	0.374	8227	0		GO:0070653	high-density lipoprotein particle receptor binding	0.00021	-7.273	-0.826	0.477	201.182	0.906	0.349	70653	0		GO:0016635	oxidoreductase activity, acting on the CH-CH group of donors, quinone or related compound as acceptor	0.00035	null	null	0.699	-57.7125	0.863	0.752	3995	1
GO:0004427	inorganic diphosphatase activity	0.00028	-3.132	3.689	0.602	501.599	0.904	0.361	4427	0		GO:0016775	phosphotransferase activity, nitrogenous group as acceptor	0.00119	-3.977	-7.311	1.23	99.0294	0.881	0.379	16775	0		GO:0050750	low-density lipoprotein particle receptor binding	0.0007	null	null	1	164.128	0.899	0.906	70653	1		GO:0008177	succinate dehydrogenase (ubiquinone) activity	0.00014	null	null	0.301	-57.7125	0.87	0.708	3995	1
GO:0051183	vitamin transporter activity	0.0007	-1.993	6.753	1	174.365	0.859	0.364	51183	0		GO:0005283	sodium:amino acid symporter activity	0.00077	-1.837	7.005	1.041	836.458	0.815	0.379	5283	0		GO:0070326	very-low-density lipoprotein particle receptor binding	0.00028	null	null	0.602	179.881	0.904	0.84	70653	1		GO:0000104	succinate dehydrogenase activity	0.00021	null	null	0.477	-38.475	0.872	0.727	3995	1
GO:0019001	guanyl nucleotide binding	0.0271	-0.793	-0.474	2.589	148.455	0.941	0.366	19001	0		GO:0008028	monocarboxylic acid transmembrane transporter activity	0.00126	null	null	1.255	58.7247	0.834	0.76	5283	1		GO:0019206	nucleoside kinase activity	0.00042	2.8	7.18	0.778	108.204	0.859	0.351	19206	0		GO:0003997	acyl-CoA oxidase activity	0.00035	null	null	0.699	-137.977	0.863	0.752	3995	1
GO:0022884	macromolecule transmembrane transporter activity	0.00084	-2.208	6.973	1.079	148.067	0.854	0.368	22884	0		GO:0005343	organic acid:sodium symporter activity	0.0023	null	null	1.519	144.275	0.804	0.835	5283	1		GO:0015197	peptide transporter activity	0.0007	0.918	-0.91	1	130.555	0.943	0.352	15197	0		GO:0004977	melanocortin receptor activity	0.00119	-0.454	-3.026	1.23	-96.1933	0.943	0.343	4977	0
GO:0016684	oxidoreductase activity, acting on peroxide as acceptor	0.00251	-3.54	-0.983	1.556	162.407	0.909	0.372	16684	0		GO:0005313	L-glutamate transmembrane transporter activity	0.00063	null	null	0.954	418.229	0.83	0.759	5283	1		GO:0019834	phospholipase A2 inhibitor activity	0.00021	1.151	1.024	0.477	88.129	0.949	0.356	19834	0		GO:0008131	primary amine oxidase activity	0.00063	3.455	-1.002	0.954	-51.5108	0.871	0.343	8131	0
GO:0042802	identical protein binding	0.03827	7.233	0.684	2.739	130.39	0.9	0.374	42802	0		GO:0015370	solute:sodium symporter activity	0.00419	null	null	1.778	61.7684	0.808	0.902	5283	1		GO:0016646	oxidoreductase activity, acting on the CH-NH group of donors, NAD or NADP as acceptor	0.00133	3.204	1.323	1.279	65.2322	0.874	0.362	16646	0		GO:0016165	lipoxygenase activity	0.00063	2.932	-0.907	0.954	-49.4471	0.871	0.343	16165	0
GO:0008227	G-protein coupled amine receptor activity	0.00216	-0.855	-3.563	1.491	142.845	0.956	0.374	8227	0		GO:0005310	dicarboxylic acid transmembrane transporter activity	0.00091	null	null	1.114	260.781	0.838	0.733	5283	1		GO:0070290	NAPE-specific phospholipase D activity	0.00014	3.921	-6.347	0.301	190.994	0.859	0.364	70290	0		GO:0008519	ammonium transmembrane transporter activity	0.00049	2.167	-1.468	0.845	-165.534	0.944	0.343	8519	0
GO:0016775	phosphotransferase activity, nitrogenous group as acceptor	0.00119	-2.337	-7.585	1.23	196.452	0.894	0.379	16775	0		GO:0017153	sodium:dicarboxylate symporter activity	0.00084	null	null	1.079	260.781	0.811	0.85	5283	1		GO:0005154	epidermal growth factor receptor binding	0.00042	-7.581	-0.86	0.778	210.733	0.908	0.365	5154	0		GO:0010851	cyclase regulator activity	0.00014	0.862	-0.324	0.301	-105.943	0.953	0.347	10851	0
GO:0005283	sodium:amino acid symporter activity	0.00077	-2.504	7.324	1.041	836.458	0.808	0.379	5283	0		GO:0005416	cation:amino acid symporter activity	0.00077	null	null	1.041	836.458	0.82	0.77	5283	1		GO:0060228	phosphatidylcholine-sterol O-acyltransferase activator activity	0.00042	0.854	0.731	0.778	237.289	0.943	0.371	60228	0		GO:0008514	organic anion transmembrane transporter activity	0.00021	1.979	-1.386	0.477	-121.335	0.948	0.349	8514	0
GO:0005343	organic acid:sodium symporter activity	0.0023	null	null	1.519	149.589	0.794	0.835	5283	1		GO:0015296	anion:cation symporter activity	0.0014	null	null	1.301	71.4919	0.821	0.766	5283	1		GO:0016645	oxidoreductase activity, acting on the CH-NH group of donors	0.00182	3.31	1.067	1.415	62.2602	0.871	0.371	16645	0		GO:0046965	retinoid X receptor binding	0.00105	-8.186	0.938	1.176	-251.464	0.892	0.349	46965	0
GO:0005313	L-glutamate transmembrane transporter activity	0.00063	null	null	0.954	418.229	0.825	0.759	5283	1		GO:0015293	symporter activity	0.00636	null	null	1.959	123.874	0.815	0.729	5283	1		GO:0003873	6-phosphofructo-2-kinase activity	0.00049	2.427	6.964	0.845	242.217	0.854	0.374	3873	0		GO:0042974	retinoic acid receptor binding	0.00112	null	null	1.204	-251.464	0.892	0.832	46965	1
GO:0015370	solute:sodium symporter activity	0.00419	null	null	1.778	121.017	0.792	0.938	5283	1		GO:0015179	L-amino acid transmembrane transporter activity	0.00182	null	null	1.415	169.059	0.817	0.819	5283	1		GO:0008443	phosphofructokinase activity	0.0007	null	null	1	161.478	0.851	0.875	3873	1		GO:0035258	steroid hormone receptor binding	0.0014	null	null	1.301	-35.6699	0.893	0.849	46965	1
GO:0005310	dicarboxylic acid transmembrane transporter activity	0.00091	null	null	1.114	260.781	0.836	0.733	5283	1		GO:0015175	neutral amino acid transmembrane transporter activity	0.00098	null	null	1.146	48.0686	0.825	0.834	5283	1		GO:0008474	palmitoyl-(protein) hydrolase activity	0.00021	4.117	-6.548	0.477	197.949	0.857	0.374	8474	0		GO:0035259	glucocorticoid receptor binding	0.00035	null	null	0.699	-195.32	0.901	0.766	46965	1
GO:0017153	sodium:dicarboxylate symporter activity	0.00084	null	null	1.079	260.781	0.801	0.85	5283	1		GO:0015172	acidic amino acid transmembrane transporter activity	0.00063	null	null	0.954	418.229	0.83	0.759	5283	1		GO:0005326	neurotransmitter transporter activity	0.00189	2.4	-2.235	1.431	103.174	0.938	0.376	5326	0		GO:0042809	vitamin D receptor binding	0.00028	null	null	0.602	-38.6383	0.9	0.755	46965	1
GO:0005416	cation:amino acid symporter activity	0.00077	null	null	1.041	836.458	0.813	0.77	5283	1		GO:0015171	amino acid transmembrane transporter activity	0.00391	null	null	1.748	59.0992	0.807	0.917	5283	1		GO:0042288	MHC class I protein binding	0.0007	-7.103	-0.782	1	92.3697	0.905	0.379	42288	0		GO:0004111	creatine kinase activity	0.00028	2.94	-7.349	0.602	-97.9414	0.85	0.351	4111	0
GO:0015294	solute:cation symporter activity	0.00531	null	null	1.881	135.042	0.794	0.889	5283	1		GO:0004536	deoxyribonuclease activity	0.00182	-1.239	3.641	1.415	216.536	0.884	0.393	4536	0		GO:0004045	aminoacyl-tRNA hydrolase activity	0.00028	3.528	-5.875	0.602	77.046	0.858	0.38	4045	0		GO:0019206	nucleoside kinase activity	0.00042	2.915	-7.341	0.778	-144.273	0.84	0.351	19206	0
GO:0015179	L-amino acid transmembrane transporter activity	0.00182	null	null	1.415	175.648	0.811	0.819	5283	1		GO:0004521	endoribonuclease activity	0.00335	null	null	1.681	68.4487	0.878	0.839	4536	1		GO:0031690	adrenergic receptor binding	0.00077	-6.69	-0.768	1.041	119.317	0.904	0.381	31690	0		GO:0019201	nucleotide kinase activity	0.00084	null	null	1.079	-30.4728	0.833	0.812	19206	1
GO:0015172	acidic amino acid transmembrane transporter activity	0.00063	null	null	0.954	418.229	0.825	0.759	5283	1		GO:0004520	endodeoxyribonuclease activity	0.00147	null	null	1.322	98.415	0.885	0.701	4536	1		GO:0043565	sequence-specific DNA binding	0.03778	0.56	0.698	2.733	116.026	0.951	0.381	43565	0		GO:0004017	adenylate kinase activity	0.00056	null	null	0.903	-50.062	0.837	0.775	19206	1
GO:0015171	amino acid transmembrane transporter activity	0.00391	null	null	1.748	112.197	0.8	0.917	5283	1		GO:0004519	endonuclease activity	0.00656	null	null	1.973	111.978	0.873	0.793	4536	1		GO:0005319	lipid transporter activity	0.00237	2.411	-2.22	1.531	138.942	0.938	0.384	5319	0		GO:0004550	nucleoside diphosphate kinase activity	0.00112	null	null	1.204	-32.5139	0.829	0.862	19206	1
GO:0008092	cytoskeletal protein binding	0.02528	8.035	0.738	2.559	126.366	0.903	0.381	8092	0		GO:0004687	myosin light chain kinase activity	0.00014	-3.8	-6.932	0.301	137.24	0.892	0.397	4687	0		GO:0042287	MHC protein binding	0.00091	-7.184	-0.79	1.114	246.991	0.903	0.386	42287	0		GO:0015197	peptide transporter activity	0.0007	0.767	-0.673	1	-90.7211	0.949	0.352	15197	0
GO:0004536	deoxyribonuclease activity	0.00182	-3.189	3.456	1.415	375.037	0.873	0.393	4536	0		GO:0004396	hexokinase activity	0.00042	-3.582	-6.588	0.778	100.579	0.886	0.397	4396	0		GO:0070325	lipoprotein particle receptor binding	0.00091	-7.403	-0.835	1.114	179.105	0.903	0.386	70325	0		GO:0005344	oxygen transporter activity	0.00112	1.722	-1.277	1.204	-87.3806	0.948	0.363	5344	0
GO:0004521	endoribonuclease activity	0.00335	null	null	1.681	97.7753	0.866	0.839	4536	1		GO:0005506	iron ion binding	0.02102	-0.331	0.212	2.479	70.5887	0.962	0.4	5506	0		GO:0008601	protein phosphatase type 2A regulator activity	0.00056	1.251	1.146	0.903	114.315	0.942	0.388	8601	0		GO:0070290	NAPE-specific phospholipase D activity	0.00014	4.191	6.276	0.301	-190.994	0.859	0.364	70290	0
GO:0004520	endodeoxyribonuclease activity	0.00147	null	null	1.322	98.415	0.874	0.701	4536	1		GO:0008440	inositol trisphosphate 3-kinase activity	0.00056	-3.884	-7.16	0.903	88.0665	0.88	0.405	8440	0		GO:0019211	phosphatase activator activity	0.00028	null	null	0.602	104.576	0.939	0.831	8601	1		GO:0005154	epidermal growth factor receptor binding	0.00042	-8.024	0.913	0.778	-210.733	0.907	0.365	5154	0
GO:0004519	endonuclease activity	0.00656	null	null	1.973	142.026	0.86	0.793	4536	1		GO:0051766	inositol trisphosphate kinase activity	0.00063	null	null	0.954	70.4532	0.879	0.82	8440	1		GO:0019888	protein phosphatase regulator activity	0.00119	null	null	1.23	98.2753	0.94	0.916	8601	1		GO:0005149	interleukin-1 receptor binding	0.00098	null	null	1.146	-40.0673	0.901	0.761	5154	1
GO:0004540	ribonuclease activity	0.00426	null	null	1.785	103.332	0.865	0.858	4536	1		GO:0004430	1-phosphatidylinositol 4-kinase activity	0.00014	null	null	0.301	74.8683	0.889	0.744	8440	1		GO:0005344	oxygen transporter activity	0.00112	2.37	-2.249	1.204	124.543	0.941	0.395	5344	0		GO:0016922	ligand-dependent nuclear receptor binding	0.00042	-6.761	0.808	0.778	-151.668	0.909	0.365	16922	0
GO:0004687	myosin light chain kinase activity	0.00014	-2.169	-7.348	0.301	102.93	0.904	0.397	4687	0		GO:0004708	MAP kinase kinase activity	0.00021	-3.833	-7.026	0.477	95.1785	0.89	0.407	4708	0		GO:0019200	carbohydrate kinase activity	0.00147	2.963	7.295	1.322	87.0578	0.847	0.395	19200	0		GO:0005337	nucleoside transmembrane transporter activity	0.00084	1.765	-1.299	1.079	-35.6691	0.947	0.366	5337	0
GO:0046983	protein dimerization activity	0.03387	8.58	0.842	2.686	116.634	0.901	0.397	46983	0		GO:0004143	diacylglycerol kinase activity	0.0007	-4.033	-7.357	1	114.996	0.883	0.411	4143	0		GO:0005159	insulin-like growth factor receptor binding	0.00175	-7.988	-0.916	1.398	139.968	0.899	0.405	5159	0		GO:0060228	phosphatidylcholine-sterol O-acyltransferase activator activity	0.00042	1.18	-0.24	0.778	-237.289	0.946	0.371	60228	0
GO:0004396	hexokinase activity	0.00042	-1.812	-6.966	0.778	88.3097	0.899	0.397	4396	0		GO:0003847	1-alkyl-2-acetylglycerophosphocholine esterase activity	0.00035	-1.647	3.819	0.699	207.482	0.894	0.418	3847	0		GO:0042801	polo kinase kinase activity	7e-05	2.075	6.409	0	164.548	0.862	0.407	42801	0		GO:0003873	6-phosphofructo-2-kinase activity	0.00049	2.612	-7.102	0.845	-136.237	0.841	0.374	3873	0
GO:0005506	iron ion binding	0.02102	-0.933	-0.688	2.479	138.988	0.946	0.4	5506	0		GO:0010576	metalloenzyme regulator activity	0.00091	-1.284	0.862	1.114	768.483	0.944	0.42	10576	0		GO:0015101	organic cation transmembrane transporter activity	0.00077	1.001	-1.037	1.041	194.237	0.936	0.415	15101	0		GO:0008443	phosphofructokinase activity	0.0007	null	null	1	-90.8244	0.837	0.875	3873	1
GO:0008307	structural constituent of muscle	0.00035	1.121	0.575	0.699	122.615	0.99	0.402	8307	0		GO:0015269	calcium-activated potassium channel activity	0.0007	-1.792	7.013	1	336.209	0.845	0.425	15269	0		GO:0003987	acetate-CoA ligase activity	0.00035	0.439	-0.297	0.699	188.541	0.879	0.424	3987	0		GO:0008474	palmitoyl-(protein) hydrolase activity	0.00021	4.373	6.564	0.477	-119.921	0.86	0.374	8474	0
GO:0016701	oxidoreductase activity, acting on single donors with incorporation of molecular oxygen	0.00321	-3.117	-0.675	1.663	108.586	0.908	0.409	16701	0		GO:0008536	Ran GTPase binding	0.00014	6.791	-1.121	0.301	167.405	0.926	0.427	8536	0		GO:0016878	acid-thiol ligase activity	0.00084	null	null	1.079	87.1913	0.873	0.952	3987	1		GO:0045028	purinergic nucleotide receptor activity, G-protein coupled	0.00168	-0.219	-4.107	1.38	-31.4461	0.955	0.375	45028	0
GO:0003847	1-alkyl-2-acetylglycerophosphocholine esterase activity	0.00035	-3.399	3.559	0.699	207.482	0.888	0.418	3847	0		GO:0017049	GTP-Rho binding	0.00028	null	null	0.602	53.0376	0.923	0.7	8536	1		GO:0004774	succinate-CoA ligase activity	0.00035	null	null	0.699	65.9166	0.879	0.9	3987	1		GO:0001614	purinergic nucleotide receptor activity	0.00203	null	null	1.462	-28.3015	0.956	0.983	45028	1
GO:0010576	metalloenzyme regulator activity	0.00091	-0.585	-0.321	1.114	768.483	0.942	0.42	10576	0		GO:0004019	adenylosuccinate synthase activity	0.00021	-0.642	0.491	0.477	196.63	0.928	0.428	4019	0		GO:0004776	succinate-CoA ligase (GDP-forming) activity	0.00014	null	null	0.301	79.3307	0.885	0.851	3987	1		GO:0015932	nucleobase, nucleoside, nucleotide and nucleic acid transmembrane transporter activity	0.00084	1.443	-1.15	1.079	-35.6691	0.947	0.378	15932	0
GO:0008233	peptidase activity	0.04714	-4.144	2.426	2.829	91.3978	0.872	0.422	8233	0		GO:0043028	caspase regulator activity	0.00112	-1.18	0.835	1.204	89.8274	0.944	0.429	43028	0		GO:0004775	succinate-CoA ligase (ADP-forming) activity	0.00028	null	null	0.602	58.2658	0.88	0.933	3987	1		GO:0004045	aminoacyl-tRNA hydrolase activity	0.00028	3.6	5.699	0.602	-102.728	0.86	0.38	4045	0
GO:0015269	calcium-activated potassium channel activity	0.0007	-2.474	7.228	1	336.209	0.834	0.425	15269	0		GO:0020037	heme binding	0.01243	-0.327	0.185	2.25	76.8621	0.963	0.429	20037	0		GO:0016405	CoA-ligase activity	0.00077	null	null	1.041	101.723	0.874	0.897	3987	1		GO:0005094	Rho GDP-dissociation inhibitor activity	0.00042	0.874	-0.309	0.778	-41.3192	0.949	0.381	5094	0
GO:0008536	Ran GTPase binding	0.00014	7.065	0.681	0.301	125.553	0.93	0.427	8536	0		GO:0003711	transcription elongation regulator activity	0.00091	0.919	-0.618	1.114	68.5449	0.989	0.432	3711	0		GO:0004658	propionyl-CoA carboxylase activity	0.00014	0.688	-0.628	0.301	139.787	0.896	0.424	4658	0		GO:0031690	adrenergic receptor binding	0.00077	-6.731	0.83	1.041	-119.317	0.906	0.381	31690	0
GO:0004019	adenylosuccinate synthase activity	0.00021	-0.14	-0.077	0.477	147.473	0.937	0.428	4019	0		GO:0003910	DNA ligase (ATP) activity	0.00028	-0.638	0.473	0.602	133.211	0.924	0.436	3910	0		GO:0003723	RNA binding	0.04023	0.379	0.399	2.76	97.9533	0.956	0.428	3723	0		GO:0016149	translation release factor activity, codon specific	0.00021	-0.069	0.327	0.477	-65.7541	0.959	0.383	16149	0
GO:0043028	caspase regulator activity	0.00112	-0.421	-0.21	1.204	201.828	0.941	0.429	43028	0		GO:0003909	DNA ligase activity	0.00028	null	null	0.602	133.211	0.924	0.95	3910	1		GO:0048156	tau protein binding	0.00042	-6.54	-0.74	0.778	179.881	0.918	0.43	48156	0		GO:0003747	translation release factor activity	0.00049	null	null	0.845	-49.3156	0.957	0.947	16149	1
GO:0020037	heme binding	0.01243	-1.56	-1.096	2.25	124.356	0.949	0.429	20037	0		GO:0032947	protein complex scaffold	0.00049	6.936	-1.066	0.845	66.5932	0.928	0.437	32947	0		GO:0031210	phosphatidylcholine binding	0.00028	-0.2	-0.018	0.602	201.182	0.959	0.439	31210	0		GO:0043566	structure-specific DNA binding	0.0058	0.212	0.109	1.919	-32.6573	0.958	0.384	43566	0
GO:0003711	transcription elongation regulator activity	0.00091	0.721	0.381	1.114	128.742	0.986	0.432	3711	0		GO:0032190	acrosin binding	0.00021	6.369	-0.922	0.477	84.6583	0.926	0.438	32190	0		GO:0005524	ATP binding	0.09246	-0.041	-0.038	3.122	104.61	0.962	0.442	5524	0		GO:0001608	nucleotide receptor activity, G-protein coupled	0.00168	-0.433	-2.918	1.38	-31.4461	0.959	0.385	1608	0
GO:0005212	structural constituent of eye lens	0.00154	1.483	0.624	1.342	88.7196	0.989	0.445	5212	0		GO:0004715	non-membrane spanning protein tyrosine kinase activity	0.0007	-3.905	-7.215	1	107.921	0.88	0.441	4715	0		GO:0030554	adenyl nucleotide binding	0.09344	null	null	3.126	106.907	0.963	0.789	5524	1		GO:0042287	MHC protein binding	0.00091	-7.367	0.827	1.114	-191.156	0.905	0.386	42287	0
GO:0004181	metallocarboxypeptidase activity	0.00147	-3.741	4.264	1.322	95.9758	0.897	0.452	4181	0		GO:0008312	7S RNA binding	0.00035	0.188	-0.156	0.699	88.8061	0.974	0.443	8312	0		GO:0032559	adenyl ribonucleotide binding	0.09309	null	null	3.125	104.852	0.962	0.904	5524	1		GO:0070325	lipoprotein particle receptor binding	0.00091	-7.668	0.857	1.114	-179.105	0.905	0.386	70325	0
GO:0008083	growth factor activity	0.01236	8.254	0.778	2.248	171.476	0.892	0.459	8083	0		GO:0016886	ligase activity, forming phosphoric ester bonds	0.00042	-0.645	0.477	0.778	60.417	0.925	0.447	16886	0		GO:0004815	aspartate-tRNA ligase activity	0.00035	0.721	-0.612	0.699	148.072	0.889	0.448	4815	0		GO:0008601	protein phosphatase type 2A regulator activity	0.00056	1.282	-0.064	0.903	-114.315	0.944	0.388	8601	0
GO:0005523	tropomyosin binding	0.00084	6.906	0.572	1.079	152.5	0.919	0.461	5523	0		GO:0008195	phosphatidate phosphatase activity	0.00028	-1.506	3.729	0.602	264.192	0.894	0.448	8195	0		GO:0004645	phosphorylase activity	0.00028	2.768	6.979	0.602	226.034	0.857	0.449	4645	0		GO:0019211	phosphatase activator activity	0.00028	null	null	0.602	-104.576	0.942	0.831	8601	1
GO:0043548	phosphatidylinositol 3-kinase binding	0.00056	7.635	0.671	0.903	106.716	0.924	0.467	43548	0		GO:0008484	sulfuric ester hydrolase activity	0.00112	-2.49	4.623	1.204	88.5193	0.891	0.455	8484	0		GO:0004843	ubiquitin-specific protease activity	0.00112	3.679	-6.135	1.204	88.3156	0.852	0.453	4843	0		GO:0019888	protein phosphatase regulator activity	0.00119	null	null	1.23	-50.2684	0.942	0.916	8601	1
GO:0003924	GTPase activity	0.01222	-3.588	3.326	2.243	225.01	0.873	0.471	3924	0		GO:0005523	tropomyosin binding	0.00084	6.687	-0.994	1.079	152.5	0.917	0.461	5523	0		GO:0019783	small conjugating protein-specific protease activity	0.00119	null	null	1.23	88.3156	0.851	0.711	4843	1		GO:0005326	neurotransmitter transporter activity	0.00189	1.775	-1.308	1.431	-33.9453	0.946	0.391	5326	0
GO:0005089	Rho guanyl-nucleotide exchange factor activity	0.00335	-0.417	-0.21	1.681	198.067	0.931	0.474	5089	0		GO:0005125	cytokine activity	0.0132	8.311	-1.325	2.276	88.8767	0.894	0.461	5125	0		GO:0043015	gamma-tubulin binding	0.00035	-6.615	-0.733	0.699	162.573	0.917	0.456	43015	0		GO:0005319	lipid transporter activity	0.00237	1.818	-1.305	1.531	-84.9659	0.945	0.395	5319	0
GO:0008060	ARF GTPase activator activity	0.00147	null	null	1.322	87.9674	0.936	0.715	5089	1		GO:0004707	MAP kinase activity	0.00119	-4.069	-6.846	1.23	100.458	0.854	0.463	4707	0		GO:0008017	microtubule binding	0.00538	null	null	1.886	77.8052	0.901	0.743	43015	1		GO:0005220	inositol 1,4,5-trisphosphate-sensitive calcium-release channel activity	0.00042	1.687	-4.239	0.778	-152.632	0.919	0.399	5220	0
GO:0005083	small GTPase regulator activity	0.01201	null	null	2.236	117.521	0.925	0.839	5089	1		GO:0005184	neuropeptide hormone activity	0.00077	8.179	-1.289	1.041	52.7529	0.914	0.465	5184	0		GO:0004357	glutamate-cysteine ligase activity	0.00021	0.63	-0.487	0.477	73.9447	0.893	0.457	4357	0		GO:0055102	lipase inhibitor activity	0.00077	1.554	0.087	1.041	-105.111	0.946	0.404	55102	0
GO:0005088	Ras guanyl-nucleotide exchange factor activity	0.0037	null	null	1.724	179.183	0.931	0.878	5089	1		GO:0043548	phosphatidylinositol 3-kinase binding	0.00056	7.32	-1.145	0.903	106.716	0.922	0.467	43548	0		GO:0008353	RNA polymerase II carboxy-terminal domain kinase activity	0.0007	2.296	6.541	1	247.129	0.852	0.468	8353	0		GO:0005159	insulin-like growth factor receptor binding	0.00175	-8.4	0.992	1.398	-41.3187	0.901	0.405	5159	0
GO:0005085	guanyl-nucleotide exchange factor activity	0.00677	null	null	1.987	127.454	0.929	0.738	5089	1		GO:0015250	water channel activity	0.00028	-1.743	6.868	0.602	73.4316	0.861	0.471	15250	0		GO:0003743	translation initiation factor activity	0.00391	0.327	0.475	1.748	70.6947	0.961	0.468	3743	0		GO:0042801	polo kinase kinase activity	7e-05	2.21	-6.555	0	-164.548	0.839	0.407	42801	0
GO:0019788	NEDD8 ligase activity	0.00028	-0.172	-0.127	0.602	121.691	0.936	0.476	19788	0		GO:0003924	GTPase activity	0.01222	-1.586	3.68	2.243	47.5954	0.886	0.471	3924	0		GO:0017002	activin receptor activity	0.00042	2.088	6.511	0.778	57.1907	0.844	0.48	17002	0		GO:0003777	microtubule motor activity	0.00391	3.926	6	1.748	-52.6548	0.846	0.409	3777	0
GO:0003993	acid phosphatase activity	0.00077	-3.178	3.521	1.041	291.313	0.877	0.476	3993	0		GO:0019788	NEDD8 ligase activity	0.00028	-0.818	0.557	0.602	76.5009	0.927	0.476	19788	0		GO:0016885	ligase activity, forming carbon-carbon bonds	0.00105	0.468	-0.372	1.176	113.255	0.883	0.481	16885	0		GO:0004843	ubiquitin-specific protease activity	0.00112	3.87	5.964	1.204	-88.3156	0.862	0.41	4843	0
GO:0030506	ankyrin binding	0.00056	7.173	0.587	0.903	117.35	0.921	0.492	30506	0		GO:0017022	myosin binding	0.00042	6.96	-1.035	0.778	72.7015	0.921	0.482	17022	0		GO:0043274	phospholipase binding	0.00028	-6.521	-0.739	0.602	223.978	0.908	0.488	43274	0		GO:0019783	small conjugating protein-specific protease activity	0.00119	null	null	1.23	-88.3156	0.861	0.711	4843	1
GO:0035035	histone acetyltransferase binding	0.00133	8.102	0.773	1.279	297.189	0.919	0.496	35035	0		GO:0042030	ATPase inhibitor activity	0.00014	-1.396	0.935	0.301	99.7933	0.94	0.49	42030	0		GO:0004437	inositol or phosphatidylinositol phosphatase activity	0.00133	3.791	-6.271	1.279	144.717	0.837	0.493	4437	0		GO:0019205	nucleobase, nucleoside, nucleotide kinase activity	0.00265	3.079	-7.429	1.58	-34.6384	0.827	0.413	19205	0
GO:0019002	GMP binding	0.00056	-0.713	-0.442	0.903	123.192	0.951	0.498	19002	0		GO:0030506	ankyrin binding	0.00056	7.056	-1.048	0.903	49.5645	0.919	0.492	30506	0		GO:0004693	cyclin-dependent protein kinase activity	0.00063	2.769	7.227	0.954	140.064	0.852	0.493	4693	0		GO:0015101	organic cation transmembrane transporter activity	0.00077	0.779	-0.716	1.041	-132.427	0.945	0.415	15101	0
GO:0004714	transmembrane receptor protein tyrosine kinase activity	0.00363	-2.62	-7.242	1.716	206.627	0.848	0.499	4714	0		GO:0004083	2,3-bisphospho-D-glycerate 2-phosphohydrolase activity	0.00021	-1.168	3.516	0.477	78.985	0.896	0.493	4083	0		GO:0004697	protein kinase C activity	0.0007	2.771	7.237	1	116.327	0.852	0.497	4697	0		GO:0004658	propionyl-CoA carboxylase activity	0.00014	-0.842	0.769	0.301	-186.382	0.901	0.424	4658	0
GO:0004715	non-membrane spanning protein tyrosine kinase activity	0.0007	null	null	1	162.297	0.893	0.759	4714	1		GO:0043014	alpha-tubulin binding	0.00063	7.38	-1.127	0.954	48.4755	0.918	0.496	43014	0		GO:0000049	tRNA binding	0.00105	0.26	0.551	1.176	70.4345	0.97	0.497	49	0		GO:0004815	aspartate-tRNA ligase activity	0.00035	-0.705	0.448	0.699	-197.43	0.895	0.424	4815	0
GO:0003702	RNA polymerase II transcription factor activity	0.0058	0.721	0.377	1.919	115.418	0.986	0.5	3702	0		GO:0035035	histone acetyltransferase binding	0.00133	7.957	-1.257	1.279	297.189	0.917	0.496	35035	0		GO:0043566	structure-specific DNA binding	0.0058	0.512	0.693	1.919	71.873	0.958	0.5	43566	0		GO:0000049	tRNA binding	0.00105	0.099	0.018	1.176	-70.4345	0.966	0.426	49	0
GO:0046872	metal ion binding	0.21007	-2.028	-1.453	3.478	105.437	0.935	0.504	46872	0		GO:0019002	GMP binding	0.00056	-0.088	0.06	0.903	50.9507	0.967	0.498	19002	0		GO:0003677	DNA binding	0.09686	0.422	0.401	3.142	94.8136	0.953	0.501	3677	0		GO:0042577	lipid phosphatase activity	0.00014	4.283	6.366	0.301	-121.142	0.859	0.43	42577	0
GO:0043169	cation binding	0.21314	null	null	3.485	105.925	0.935	0.782	46872	1		GO:0034416	bisphosphoglycerate phosphatase activity	0.00028	-2.729	4.716	0.602	78.985	0.894	0.502	34416	0		GO:0030250	guanylate cyclase activator activity	0.00014	1.367	1.227	0.301	105.943	0.939	0.501	30250	0		GO:0048156	tau protein binding	0.00042	-6.663	0.77	0.778	-179.881	0.922	0.43	48156	0
GO:0019843	rRNA binding	0.00196	0.553	0.321	1.447	160.192	0.966	0.506	19843	0		GO:0008060	ARF GTPase activator activity	0.00147	-1.26	0.862	1.322	87.9674	0.938	0.508	8060	0		GO:0030249	guanylate cyclase regulator activity	0.00014	null	null	0.301	105.943	0.944	1	30250	1		GO:0019208	phosphatase regulator activity	0.00147	1.623	0.067	1.322	-50.2684	0.947	0.432	19208	0
GO:0000268	peroxisome targeting sequence binding	0.00021	-0.241	-3.257	0.477	253.554	0.954	0.511	268	0		GO:0000268	peroxisome targeting sequence binding	0.00021	-1.07	-2.595	0.477	253.554	0.954	0.511	268	0		GO:0010853	cyclase activator activity	0.00014	null	null	0.301	105.943	0.944	1	30250	1		GO:0017129	triglyceride binding	7e-05	-0.641	0.143	0	-188.61	0.964	0.439	17129	0
GO:0004862	cAMP-dependent protein kinase inhibitor activity	0.00028	-0.396	-0.187	0.602	192.176	0.929	0.512	4862	0		GO:0030942	endoplasmic reticulum signal peptide binding	0.00014	null	null	0.301	87.0296	0.955	0.837	268	1		GO:0005391	sodium:potassium-exchanging ATPase activity	0.0007	3.82	-5.403	1	235.986	0.794	0.502	5391	0		GO:0003987	acetate-CoA ligase activity	0.00035	-0.341	-0.009	0.699	-128.4	0.889	0.448	3987	0
GO:0019210	kinase inhibitor activity	0.00196	null	null	1.447	107.555	0.923	0.725	4862	1		GO:0046923	ER retention sequence binding	0.00021	null	null	0.477	94.4588	0.954	0.857	268	1		GO:0005328	neurotransmitter:sodium symporter activity	0.00182	null	null	1.415	103.174	0.92	0.747	5391	1		GO:0016878	acid-thiol ligase activity	0.00084	null	null	1.079	-40.6128	0.883	0.952	3987	1
GO:0030291	protein serine/threonine kinase inhibitor activity	0.00126	null	null	1.255	134.253	0.922	0.853	4862	1		GO:0004862	cAMP-dependent protein kinase inhibitor activity	0.00028	-0.957	0.675	0.602	192.176	0.93	0.512	4862	0		GO:0016790	thiolester hydrolase activity	0.00545	4.543	-6.962	1.892	64.9179	0.827	0.504	16790	0		GO:0004774	succinate-CoA ligase activity	0.00035	null	null	0.699	-31.2125	0.889	0.9	3987	1
GO:0019887	protein kinase regulator activity	0.00461	null	null	1.82	104.306	0.923	0.899	4862	1		GO:0019210	kinase inhibitor activity	0.00196	null	null	1.447	103.184	0.924	0.725	4862	1		GO:0016657	oxidoreductase activity, acting on NADH or NADPH, nitrogenous group as acceptor	0.00014	2.678	1.517	0.301	107.881	0.888	0.508	16657	0		GO:0016405	CoA-ligase activity	0.00077	null	null	1.041	-47.3816	0.884	0.897	3987	1
GO:0016538	cyclin-dependent protein kinase regulator activity	0.00133	null	null	1.279	98.0555	0.929	0.812	4862	1		GO:0030291	protein serine/threonine kinase inhibitor activity	0.00126	null	null	1.255	128.69	0.923	0.853	4862	1		GO:0008121	ubiquinol-cytochrome-c reductase activity	0.00042	3.842	0.078	0.778	55.6852	0.824	0.511	8121	0		GO:0019200	carbohydrate kinase activity	0.00147	2.948	-7.423	1.322	-25.0734	0.833	0.449	19200	0
GO:0004861	cyclin-dependent protein kinase inhibitor activity	0.00098	null	null	1.146	114.176	0.923	0.932	4862	1		GO:0019887	protein kinase regulator activity	0.00461	null	null	1.82	44.6318	0.925	0.899	4862	1		GO:0016681	oxidoreductase activity, acting on diphenols and related substances as donors, cytochrome as acceptor	0.00042	null	null	0.778	55.6852	0.879	1	8121	1		GO:0004645	phosphorylase activity	0.00028	2.848	-7.081	0.602	-226.034	0.852	0.449	4645	0
GO:0004860	protein kinase inhibitor activity	0.00175	null	null	1.398	115.829	0.921	0.956	4862	1		GO:0008603	cAMP-dependent protein kinase regulator activity	0.00098	null	null	1.146	75.1059	0.932	0.794	4862	1		GO:0030695	GTPase regulator activity	0.01795	0.674	0.471	2.41	111.033	0.93	0.514	30695	0		GO:0043015	gamma-tubulin binding	0.00035	-6.774	0.712	0.699	-162.573	0.922	0.456	43015	0
GO:0004707	MAP kinase activity	0.00119	-2.468	-7.313	1.23	200.066	0.866	0.513	4707	0		GO:0004861	cyclin-dependent protein kinase inhibitor activity	0.00098	null	null	1.146	106.526	0.924	0.932	4862	1		GO:0008047	enzyme activator activity	0.01453	null	null	2.318	95.5314	0.935	0.718	30695	1		GO:0004357	glutamate-cysteine ligase activity	0.00021	-0.482	0.172	0.477	-295.779	0.898	0.457	4357	0
GO:0003840	gamma-glutamyltransferase activity	0.00021	-1.687	-6.713	0.477	179.586	0.904	0.516	3840	0		GO:0004860	protein kinase inhibitor activity	0.00175	null	null	1.398	111.121	0.922	0.956	4862	1		GO:0060589	nucleoside-triphosphatase regulator activity	0.01858	null	null	2.425	107.468	0.934	0.74	30695	1		GO:0008353	RNA polymerase II carboxy-terminal domain kinase activity	0.0007	2.492	-6.739	1	-247.129	0.836	0.468	8353	0
GO:0003870	5-aminolevulinate synthase activity	0.00014	-1.676	-6.649	0.301	109.264	0.904	0.523	3870	0		GO:0003840	gamma-glutamyltransferase activity	0.00021	-3.469	-6.419	0.477	239.448	0.888	0.516	3840	0		GO:0005099	Ras GTPase activator activity	0.00356	null	null	1.708	88.8486	0.933	0.81	30695	1		GO:0003828	alpha-N-acetylneuraminate alpha-2,8-sialyltransferase activity	0.00035	2.547	-6.858	0.699	-49.0379	0.851	0.475	3828	0
GO:0016749	N-succinyltransferase activity	0.00014	null	null	0.301	109.264	0.904	0.922	3870	1		GO:0004331	fructose-2,6-bisphosphate 2-phosphatase activity	0.00049	-2.008	4.139	0.845	94.2045	0.891	0.52	4331	0		GO:0005097	Rab GTPase activator activity	0.0021	null	null	1.477	98.1659	0.935	0.768	30695	1		GO:0005432	calcium:sodium antiporter activity	0.00035	1.341	-1.097	0.699	-150.013	0.935	0.48	5432	0
GO:0043559	insulin binding	0.00035	-0.176	-2.559	0.699	160.075	0.952	0.528	43559	0		GO:0003870	5-aminolevulinate synthase activity	0.00014	-3.483	-6.44	0.301	145.685	0.887	0.523	3870	0		GO:0005096	GTPase activator activity	0.00922	null	null	2.121	97.942	0.929	0.899	30695	1		GO:0015368	calcium:cation antiporter activity	0.00042	null	null	0.778	-100.009	0.935	0.871	5432	1
GO:0017046	peptide hormone binding	0.00216	null	null	1.491	120.168	0.946	0.792	43559	1		GO:0016749	N-succinyltransferase activity	0.00014	null	null	0.301	145.685	0.887	0.922	3870	1		GO:0022843	voltage-gated cation channel activity	0.0095	1.485	-1.453	2.134	114.619	0.918	0.519	22843	0		GO:0015301	anion:anion antiporter activity	0.0014	null	null	1.301	-100.025	0.932	0.782	5432	1
GO:0003729	mRNA binding	0.00328	0.478	0.303	1.672	187.608	0.965	0.528	3729	0		GO:0042171	lysophosphatidic acid acyltransferase activity	0.00014	-3.503	-6.475	0.301	83.2247	0.889	0.523	42171	0		GO:0005244	voltage-gated ion channel activity	0.01208	null	null	2.238	80.3808	0.919	0.962	22843	1		GO:0015300	solute:solute antiporter activity	0.00335	null	null	1.681	-46.6691	0.932	0.916	5432	1
GO:0008553	hydrogen-exporting ATPase activity, phosphorylative mechanism	0.00063	-3.647	7.218	0.954	429.728	0.746	0.528	8553	0		GO:0043559	insulin binding	0.00035	-0.861	-1.971	0.699	160.075	0.957	0.528	43559	0		GO:0005245	voltage-gated calcium channel activity	0.00321	null	null	1.663	111.404	0.924	0.839	22843	1		GO:0003725	double-stranded RNA binding	0.00251	0.18	0.045	1.556	-52.6413	0.958	0.48	3725	0
GO:0015405	P-P-bond-hydrolysis-driven transmembrane transporter activity	0.00684	null	null	1.991	173.456	0.8	0.98	8553	1		GO:0003729	mRNA binding	0.00328	0.529	-0.379	1.672	92.9085	0.971	0.528	3729	0		GO:0005249	voltage-gated potassium channel activity	0.00545	null	null	1.892	121.952	0.921	0.884	22843	1		GO:0017002	activin receptor activity	0.00042	2.207	-6.655	0.778	-76.2543	0.812	0.48	17002	0
GO:0042626	ATPase activity, coupled to transmembrane movement of substances	0.00601	null	null	1.934	178.296	0.711	0.929	8553	1		GO:0008553	hydrogen-exporting ATPase activity, phosphorylative mechanism	0.00063	-2.914	7.279	0.954	429.728	0.763	0.528	8553	0		GO:0022832	voltage-gated channel activity	0.01208	null	null	2.238	80.3808	0.923	0.861	22843	1		GO:0004675	transmembrane receptor protein serine/threonine kinase activity	0.00126	null	null	1.255	-33.8106	0.801	0.733	17002	1
GO:0042625	ATPase activity, coupled to transmembrane movement of ions	0.00412	null	null	1.771	176.49	0.715	0.956	8553	1		GO:0042625	ATPase activity, coupled to transmembrane movement of ions	0.00412	null	null	1.771	58.4037	0.733	0.9	8553	1		GO:0032934	sterol binding	0.00112	-0.603	0.167	1.204	170.004	0.958	0.52	32934	0		GO:0005024	transforming growth factor beta receptor activity	0.00112	null	null	1.204	-33.8106	0.801	0.915	17002	1
GO:0015662	ATPase activity, coupled to transmembrane movement of ions, phosphorylative mechanism	0.003	null	null	1.633	251.985	0.721	0.83	8553	1		GO:0015662	ATPase activity, coupled to transmembrane movement of ions, phosphorylative mechanism	0.003	null	null	1.633	88.1885	0.739	0.83	8553	1		GO:0015485	cholesterol binding	0.00063	null	null	0.954	170.004	0.959	0.817	32934	1		GO:0005025	transforming growth factor beta receptor activity, type I	0.00077	null	null	1.041	-29.4955	0.805	0.955	17002	1
GO:0008195	phosphatidate phosphatase activity	0.00028	-3.21	3.53	0.602	264.192	0.885	0.535	8195	0		GO:0004864	protein phosphatase inhibitor activity	0.00056	-0.956	0.67	0.903	114.501	0.936	0.536	4864	0		GO:0055102	lipase inhibitor activity	0.00077	1.462	1.366	1.041	105.111	0.945	0.529	55102	0		GO:0016885	ligase activity, forming carbon-carbon bonds	0.00105	-0.362	-0.02	1.176	-68.3313	0.889	0.481	16885	0
GO:0010302	2-oxoglutarate-dependent dioxygenase activity	7e-05	-1.241	-0.728	0	304.803	0.913	0.542	10302	0		GO:0019212	phosphatase inhibitor activity	0.00063	null	null	0.954	112.016	0.935	0.877	4864	1		GO:0042577	lipid phosphatase activity	0.00014	4.022	-6.417	0.301	90.8567	0.858	0.53	42577	0		GO:0034593	phosphatidylinositol bisphosphate phosphatase activity	0.00035	3.718	5.865	0.699	-80.7615	0.851	0.488	34593	0
GO:0019798	procollagen-proline dioxygenase activity	0.0007	null	null	1	176.592	0.899	0.992	10302	1		GO:0004372	glycine hydroxymethyltransferase activity	0.00014	-3.348	-6.199	0.301	61.9746	0.903	0.538	4372	0		GO:0004190	aspartic-type endopeptidase activity	0.0081	4.455	-6.526	2.064	131.301	0.831	0.533	4190	0		GO:0043274	phospholipase binding	0.00028	-6.401	0.754	0.602	-223.978	0.922	0.488	43274	0
GO:0004656	procollagen-proline 4-dioxygenase activity	0.00063	null	null	0.954	176.592	0.9	0.723	10302	1		GO:0004176	ATP-dependent peptidase activity	0.00035	-2.177	4.442	0.699	54.8957	0.905	0.538	4176	0		GO:0043027	caspase inhibitor activity	0.00084	1.194	1.056	1.079	101.604	0.945	0.548	43027	0		GO:0004693	cyclin-dependent protein kinase activity	0.00063	2.897	-7.322	0.954	-140.064	0.837	0.493	4693	0
GO:0031543	peptidyl-proline dioxygenase activity	0.0007	null	null	1	176.592	0.901	0.836	10302	1		GO:0030898	actin-dependent ATPase activity	0.00035	-1.736	3.975	0.699	59.1611	0.906	0.538	30898	0		GO:0004844	uracil DNA N-glycosylase activity	0.00014	3.509	-5.903	0.301	72.42	0.871	0.549	4844	0		GO:0004697	protein kinase C activity	0.0007	2.91	-7.322	1	-86.2996	0.836	0.497	4697	0
GO:0031545	peptidyl-proline 4-dioxygenase activity	0.00063	null	null	0.954	176.592	0.9	0.992	10302	1		GO:0005501	retinoid binding	0.00133	0.154	-0.16	1.279	106.257	0.953	0.541	5501	0		GO:0009374	biotin binding	7e-05	-0.152	-0.052	0	60.9672	0.97	0.554	9374	0		GO:0019834	phospholipase A2 inhibitor activity	0.00021	1.213	-0.153	0.477	-88.129	0.948	0.5	19834	0
GO:0022839	ion gated channel activity	0.00084	-2.284	7.034	1.079	336.209	0.842	0.545	22839	0		GO:0019841	retinol binding	0.00063	null	null	0.954	90.2972	0.954	0.945	5501	1		GO:0003916	DNA topoisomerase activity	0.00042	0.559	0.286	0.778	381.45	0.864	0.555	3916	0		GO:0004859	phospholipase inhibitor activity	0.00049	null	null	0.845	-44.0645	0.946	0.891	19834	1
GO:0051427	hormone receptor binding	0.00454	8.005	0.728	1.813	168.511	0.901	0.547	51427	0		GO:0016918	retinal binding	0.00056	null	null	0.903	75.2477	0.955	0.937	5501	1		GO:0004615	phosphomannomutase activity	0.00014	-0.862	-0.156	0.301	86.7935	0.898	0.555	4615	0		GO:0030250	guanylate cyclase activator activity	0.00014	1.348	-0.03	0.301	-105.943	0.941	0.501	30250	0
GO:0004518	nuclease activity	0.01062	-3.489	3.265	2.182	146.232	0.86	0.549	4518	0		GO:0010302	2-oxoglutarate-dependent dioxygenase activity	7e-05	-1.316	1.077	0	304.803	0.901	0.542	10302	0		GO:0047750	cholestenol delta-isomerase activity	0.00014	-0.248	-0.14	0.301	157.331	0.894	0.555	47750	0		GO:0030249	guanylate cyclase regulator activity	0.00014	null	null	0.301	-105.943	0.946	1	30250	1
GO:0005164	tumor necrosis factor receptor binding	0.00147	8.364	0.822	1.322	305.702	0.904	0.552	5164	0		GO:0019798	procollagen-proline dioxygenase activity	0.0007	null	null	1	176.592	0.885	0.992	10302	1		GO:0016863	intramolecular oxidoreductase activity, transposing C=C bonds	0.00063	null	null	0.954	60.1517	0.884	0.842	47750	1		GO:0010853	cyclase activator activity	0.00014	null	null	0.301	-105.943	0.946	1	30250	1
GO:0005048	signal sequence binding	0.0007	-0.041	-1.252	1	93.9023	0.951	0.552	5048	0		GO:0004656	procollagen-proline 4-dioxygenase activity	0.00063	null	null	0.954	176.592	0.886	0.723	10302	1		GO:0016861	intramolecular oxidoreductase activity, interconverting aldoses and ketoses	0.00077	null	null	1.041	101.255	0.883	0.783	47750	1		GO:0016657	oxidoreductase activity, acting on NADH or NADPH, nitrogenous group as acceptor	0.00014	2.755	-0.84	0.301	-143.842	0.881	0.508	16657	0
GO:0070567	cytidylyltransferase activity	0.00021	-1.704	-6.733	0.477	122.198	0.899	0.555	70567	0		GO:0031543	peptidyl-proline dioxygenase activity	0.0007	null	null	1	176.592	0.887	0.836	10302	1		GO:0050220	prostaglandin-E synthase activity	0.00021	null	null	0.477	153.056	0.891	0.706	47750	1		GO:0004683	calmodulin-dependent protein kinase activity	0.00098	2.975	-7.499	1.146	-35.3054	0.832	0.509	4683	0
GO:0022890	inorganic cation transmembrane transporter activity	0.02186	-2.299	7.138	2.496	195.226	0.801	0.559	22890	0		GO:0031545	peptidyl-proline 4-dioxygenase activity	0.00063	null	null	0.954	176.592	0.886	0.992	10302	1		GO:0004342	glucosamine-6-phosphate deaminase activity	0.00021	null	null	0.477	117.155	0.891	0.723	47750	1		GO:0008967	phosphoglycolate phosphatase activity	0.00028	4.463	6.827	0.602	-50.0971	0.853	0.509	8967	0
GO:0046873	metal ion transmembrane transporter activity	0.00887	null	null	2.104	149.558	0.816	0.718	22890	1		GO:0022839	ion gated channel activity	0.00084	-1.7	6.859	1.079	336.209	0.852	0.545	22839	0		GO:0070815	peptidyl-lysine 5-dioxygenase activity	0.00028	2.559	1.459	0.602	97.7314	0.882	0.555	70815	0		GO:0017056	structural constituent of nuclear pore	0.00325	-1.295	0.384	1.663	-59.2626	0.991	0.51	17056	0
GO:0008565	protein transporter activity	0.00524	-2.471	7.253	1.875	101.486	0.843	0.559	8565	0		GO:0016748	succinyltransferase activity	0.00028	-3.584	-6.6	0.602	97.1236	0.885	0.545	16748	0		GO:0019208	phosphatase regulator activity	0.00147	1.528	1.423	1.322	98.2753	0.944	0.561	19208	0		GO:0004190	aspartic-type endopeptidase activity	0.0081	4.593	6.368	2.064	-29.4856	0.843	0.514	4190	0
GO:0005227	calcium activated cation channel activity	0.0007	-2.907	7.752	1	336.209	0.836	0.561	5227	0		GO:0004518	nuclease activity	0.01062	-1.415	3.687	2.182	48.3382	0.873	0.549	4518	0		GO:0002020	protease binding	0.00182	-7.957	-0.899	1.415	185.351	0.895	0.562	2020	0		GO:0032934	sterol binding	0.00112	-1.344	0.753	1.204	-170.004	0.956	0.52	32934	0
GO:0005501	retinoid binding	0.00133	0.15	0.133	1.279	121.508	0.958	0.561	5501	0		GO:0005164	tumor necrosis factor receptor binding	0.00147	8.278	-1.317	1.322	165.475	0.904	0.552	5164	0		GO:0034593	phosphatidylinositol bisphosphate phosphatase activity	0.00035	3.611	-5.985	0.699	60.5711	0.851	0.563	34593	0		GO:0015485	cholesterol binding	0.00063	null	null	0.954	-170.004	0.958	0.817	32934	1
GO:0019841	retinol binding	0.00063	null	null	0.954	92.1241	0.959	0.945	5501	1		GO:0005048	signal sequence binding	0.0007	-0.628	-0.974	1	93.9023	0.956	0.552	5048	0		GO:0034235	GPI anchor binding	0.00021	-0.198	-0.025	0.477	107.45	0.961	0.564	34235	0		GO:0004615	phosphomannomutase activity	0.00014	-1.757	1.255	0.301	-86.7935	0.897	0.521	4615	0
GO:0045513	interleukin-27 binding	0.00014	6.881	0.569	0.301	308.969	0.932	0.564	45513	0		GO:0070567	cytidylyltransferase activity	0.00021	-3.408	-6.267	0.477	122.198	0.89	0.555	70567	0		GO:0003878	ATP citrate synthase activity	0.00021	2.356	6.709	0.477	87.3987	0.857	0.565	3878	0		GO:0047750	cholestenol delta-isomerase activity	0.00014	-0.629	0.24	0.301	-157.331	0.891	0.521	47750	0
GO:0017124	SH3 domain binding	0.003	7.564	0.666	1.633	382.239	0.913	0.565	17124	0		GO:0004082	bisphosphoglycerate mutase activity	0.00021	0.195	-0.148	0.477	78.985	0.927	0.555	4082	0		GO:0003988	acetyl-CoA C-acyltransferase activity	0.00021	2.29	6.489	0.477	87.7009	0.856	0.565	3988	0		GO:0000247	C-8 sterol isomerase activity	0.00014	null	null	0.301	-54.6699	0.891	0.83	47750	1
GO:0046920	alpha(1,3)-fucosyltransferase activity	0.00028	-2.036	-7.114	0.602	226.775	0.9	0.568	46920	0		GO:0004619	phosphoglycerate mutase activity	0.00028	null	null	0.602	78.985	0.926	0.823	4082	1		GO:0004607	phosphatidylcholine-sterol O-acyltransferase activity	0.00021	2.733	7.006	0.477	119.146	0.856	0.565	4607	0		GO:0016863	intramolecular oxidoreductase activity, transposing C=C bonds	0.00063	null	null	0.954	-52.1926	0.882	0.842	47750	1
GO:0008135	translation factor activity, nucleic acid binding	0.00698	0.58	0.31	2	126.343	0.963	0.577	8135	0		GO:0009982	pseudouridine synthase activity	0.00105	null	null	1.176	46.9009	0.921	0.786	4082	1		GO:0016887	ATPase activity	0.0206	3.985	-5.841	2.47	127.576	0.82	0.567	16887	0		GO:0016861	intramolecular oxidoreductase activity, interconverting aldoses and ketoses	0.00077	null	null	1.041	-135.007	0.881	0.783	47750	1
GO:0005375	copper ion transmembrane transporter activity	0.00014	-2.312	6.988	0.301	809.516	0.854	0.584	5375	0		GO:0004167	dopachrome isomerase activity	0.00021	1.14	-0.732	0.477	55.714	0.93	0.555	4167	0		GO:0008026	ATP-dependent helicase activity	0.00643	null	null	1.964	97.4645	0.824	0.823	16887	1		GO:0050220	prostaglandin-E synthase activity	0.00021	null	null	0.477	-153.056	0.889	0.723	47750	1
GO:0003854	3-beta-hydroxy-delta5-steroid dehydrogenase activity	0.00028	-2.274	-1.29	0.602	292.137	0.916	0.586	3854	0		GO:0016653	oxidoreductase activity, acting on NADH or NADPH, heme protein as acceptor	0.00042	-2.347	1.729	0.778	76.4118	0.906	0.555	16653	0		GO:0042623	ATPase activity, coupled	0.01515	null	null	2.336	120.678	0.821	0.731	16887	1		GO:0004342	glucosamine-6-phosphate deaminase activity	0.00021	null	null	0.477	-156.207	0.889	0.706	47750	1
GO:0005272	sodium channel activity	0.00133	-2.578	7.369	1.279	106.373	0.829	0.588	5272	0		GO:0005540	hyaluronic acid binding	0.00119	0.221	-0.162	1.23	61.4464	0.969	0.557	5540	0		GO:0070035	purine NTP-dependent helicase activity	0.00643	null	null	1.964	97.4645	0.827	0.928	16887	1		GO:0016877	ligase activity, forming carbon-sulfur bonds	0.00112	-0.692	0.641	1.204	-35.5362	0.888	0.522	16877	0
GO:0019840	isoprenoid binding	0.00133	0.33	0.162	1.279	121.508	0.96	0.588	19840	0		GO:0019203	carbohydrate phosphatase activity	0.00084	-2.508	4.626	1.079	56.5227	0.887	0.558	19203	0		GO:0009008	DNA-methyltransferase activity	0.00042	2.709	6.835	0.778	153.043	0.855	0.568	9008	0		GO:0051015	actin filament binding	0.00272	-7.302	0.845	1.591	-42.6367	0.912	0.524	51015	0
GO:0004962	endothelin receptor activity	0.00035	-1.533	-3.99	0.699	142.386	0.927	0.589	4962	0		GO:0022890	inorganic cation transmembrane transporter activity	0.02186	-1.742	7.006	2.496	112.579	0.816	0.559	22890	0		GO:0004383	guanylate cyclase activity	0.00105	-0.526	-0.93	1.176	88.8458	0.906	0.568	4383	0		GO:0034450	ubiquitin-ubiquitin ligase activity	0.0007	-0.588	0.279	1	-32.8165	0.891	0.527	34450	0
GO:0015057	thrombin receptor activity	0.00035	-2.156	-5.051	0.699	94.0394	0.927	0.589	15057	0		GO:0046873	metal ion transmembrane transporter activity	0.00887	null	null	2.104	59.6478	0.829	0.718	22890	1		GO:0016564	transcription repressor activity	0.01152	-0.777	-0.043	2.217	135.858	0.987	0.571	16564	0		GO:0051861	glycolipid binding	0.00035	-1.352	0.77	0.699	-71.1048	0.961	0.528	51861	0
GO:0004768	stearoyl-CoA 9-desaturase activity	0.00028	-2.913	-1.663	0.602	1661.76	0.91	0.59	4768	0		GO:0005227	calcium activated cation channel activity	0.0007	-2.692	7.617	1	336.209	0.847	0.561	5227	0		GO:0019903	protein phosphatase binding	0.00223	-7.598	-0.859	1.505	63.7432	0.894	0.572	19903	0		GO:0005080	protein kinase C binding	0.00084	-6.775	0.799	1.079	-107.494	0.916	0.529	5080	0
GO:0015520	tetracycline:hydrogen antiporter activity	0.00042	-2.911	7.799	0.778	327.055	0.82	0.596	15520	0		GO:0004857	enzyme inhibitor activity	0.01865	-0.973	0.67	2.427	66.5238	0.931	0.564	4857	0		GO:0008376	acetylgalactosaminyltransferase activity	0.00063	2.329	6.603	0.954	195.991	0.848	0.572	8376	0		GO:0004035	alkaline phosphatase activity	0.00056	3.698	5.819	0.903	-53.3081	0.847	0.532	4035	0
GO:0008493	tetracycline transporter activity	0.00042	null	null	0.778	327.055	0.854	1	15520	1		GO:0004016	adenylate cyclase activity	0.0007	0.696	-0.437	1	107.74	0.935	0.564	4016	0		GO:0015926	glucosidase activity	0.00014	3.576	-5.944	0.301	316.202	0.87	0.573	15926	0		GO:0004653	polypeptide N-acetylgalactosaminyltransferase activity	0.00028	2.857	-7.092	0.602	-198.586	0.851	0.544	4653	0
GO:0042895	antibiotic transporter activity	0.00042	null	null	0.778	327.055	0.855	0.91	15520	1		GO:0019972	interleukin-12 binding	0.00028	6.511	-0.929	0.602	286.486	0.93	0.564	19972	0		GO:0004035	alkaline phosphatase activity	0.00056	3.621	-5.992	0.903	78.2327	0.846	0.582	4035	0		GO:0048531	beta-1,3-galactosyltransferase activity	0.00028	2.858	-7.176	0.602	-118.74	0.852	0.544	48531	0
GO:0015307	drug:hydrogen antiporter activity	0.00042	null	null	0.778	327.055	0.821	0.91	15520	1		GO:0070569	uridylyltransferase activity	0.00028	-3.417	-6.276	0.602	117.372	0.889	0.564	70569	0		GO:0015300	solute:solute antiporter activity	0.00335	1.31	-1.357	1.681	127.728	0.918	0.59	15300	0		GO:0043027	caspase inhibitor activity	0.00084	1.268	-0.15	1.079	-32.7961	0.945	0.548	43027	0
GO:0015299	solute:hydrogen antiporter activity	0.00154	null	null	1.342	158.69	0.811	0.873	15520	1		GO:0000062	fatty-acyl-CoA binding	0.00077	0.057	-0.101	1.041	77.344	0.952	0.565	62	0		GO:0015491	cation:cation antiporter activity	0.00126	null	null	1.255	61.4764	0.919	0.908	15300	1		GO:0004844	uracil DNA N-glycosylase activity	0.00014	3.704	5.719	0.301	-96.56	0.867	0.549	4844	0
GO:0004713	protein tyrosine kinase activity	0.00726	-2.671	-7.286	2.017	145.059	0.875	0.601	4713	0		GO:0005504	fatty acid binding	0.00189	null	null	1.431	44.8481	0.951	0.88	62	1		GO:0015368	calcium:cation antiporter activity	0.00042	null	null	0.778	75.0066	0.922	0.871	15300	1		GO:0019104	DNA N-glycosylase activity	0.00042	null	null	0.778	-39.7297	0.859	0.815	4844	1
GO:0004672	protein kinase activity	0.03729	null	null	2.728	118.123	0.859	0.719	4713	1		GO:0017124	SH3 domain binding	0.003	7.197	-1.076	1.633	192.823	0.912	0.565	17124	0		GO:0005432	calcium:sodium antiporter activity	0.00035	null	null	0.699	112.51	0.922	0.823	15300	1		GO:0003988	acetyl-CoA C-acyltransferase activity	0.00021	2.45	-6.625	0.477	-116.934	0.845	0.549	3988	0
GO:0004674	protein serine/threonine kinase activity	0.02465	null	null	2.548	112.511	0.862	0.844	4713	1		GO:0070080	titin Z domain binding	0.00014	6.32	-0.911	0.301	44.8282	0.927	0.565	70080	0		GO:0015301	anion:anion antiporter activity	0.0014	null	null	1.301	118.664	0.919	0.916	15300	1		GO:0004607	phosphatidylcholine-sterol O-acyltransferase activity	0.00021	2.814	-7.073	0.477	-119.146	0.844	0.549	4607	0
GO:0004175	endopeptidase activity	0.03338	-4.982	2.901	2.679	91.151	0.867	0.601	4175	0		GO:0005087	Ran guanyl-nucleotide exchange factor activity	0.00014	-0.891	0.628	0.301	69.1911	0.945	0.567	5087	0		GO:0015297	antiporter activity	0.00356	null	null	1.708	126.003	0.923	0.786	15300	1		GO:0016406	carnitine O-acyltransferase activity	0.00028	null	null	0.602	-82.9701	0.841	0.752	4607	1
GO:0004252	serine-type endopeptidase activity	0.01152	null	null	2.217	97.7009	0.877	0.759	4175	1		GO:0005089	Rho guanyl-nucleotide exchange factor activity	0.00335	null	null	1.681	63.4401	0.933	0.765	5087	1		GO:0015298	solute:cation antiporter activity	0.00196	null	null	1.447	135.222	0.917	0.941	15300	1		GO:0008047	enzyme activator activity	0.01453	1.744	0.085	2.318	-31.5365	0.938	0.55	8047	0
GO:0008236	serine-type peptidase activity	0.01341	null	null	2.283	98.0081	0.876	0.965	4175	1		GO:0005088	Ras guanyl-nucleotide exchange factor activity	0.0037	null	null	1.724	57.0795	0.933	0.878	5087	1		GO:0004379	glycylpeptide N-tetradecanoyltransferase activity	0.00042	2.364	6.768	0.778	94.5147	0.849	0.592	4379	0		GO:0008094	DNA-dependent ATPase activity	0.00244	3.969	6.101	1.544	-42.5549	0.848	0.554	8094	0
GO:0070011	peptidase activity, acting on L-amino acid peptides	0.04407	null	null	2.8	92.4104	0.864	0.893	4175	1		GO:0046920	alpha(1,3)-fucosyltransferase activity	0.00028	-3.643	-6.709	0.602	226.775	0.878	0.568	46920	0		GO:0004402	histone acetyltransferase activity	0.00154	null	null	1.342	63.7459	0.836	0.765	4379	1		GO:0003916	DNA topoisomerase activity	0.00042	0.218	0.126	0.778	-133.712	0.863	0.555	3916	0
GO:0005179	hormone activity	0.01229	8.64	0.87	2.246	157.944	0.892	0.608	5179	0		GO:0008107	galactoside 2-alpha-L-fucosyltransferase activity	0.00035	null	null	0.699	123.308	0.877	0.813	46920	1		GO:0004468	lysine N-acetyltransferase activity	0.00154	null	null	1.342	63.7459	0.836	0.898	4379	1		GO:0070815	peptidyl-lysine 5-dioxygenase activity	0.00028	2.672	-0.87	0.602	-97.7314	0.873	0.555	70815	0
GO:0016820	hydrolase activity, acting on acid anhydrides, catalyzing transmembrane movement of substances	0.00622	-3.742	7.069	1.949	178.296	0.743	0.609	16820	0		GO:0031127	alpha(1,2)-fucosyltransferase activity	0.00035	null	null	0.699	123.308	0.877	0.825	46920	1		GO:0019107	myristoyltransferase activity	0.00042	2.317	6.571	0.778	94.5147	0.85	0.592	19107	0		GO:0032405	MutLalpha complex binding	0.00021	-6.556	0.679	0.477	-95.1343	0.925	0.557	32405	0
GO:0008081	phosphoric diester hydrolase activity	0.00468	-3.828	3.862	1.826	127.437	0.861	0.61	8081	0		GO:0005375	copper ion transmembrane transporter activity	0.00014	-1.649	6.69	0.301	809.516	0.864	0.584	5375	0		GO:0008395	steroid hydroxylase activity	0.00049	1.552	0.658	0.845	105.338	0.878	0.594	8395	0		GO:0002020	protease binding	0.00182	-7.95	0.897	1.415	-29.0251	0.912	0.562	2020	0
GO:0016791	phosphatase activity	0.01543	null	null	2.344	91.9723	0.847	0.819	8081	1		GO:0003854	3-beta-hydroxy-delta5-steroid dehydrogenase activity	0.00028	-1.789	1.36	0.602	389.517	0.901	0.586	3854	0		GO:0050733	RS domain binding	0.00035	-6.594	-0.727	0.699	68.6174	0.921	0.594	50733	0		GO:0034235	GPI anchor binding	0.00021	-0.567	0.02	0.477	-107.45	0.96	0.564	34235	0
GO:0008138	protein tyrosine/serine/threonine phosphatase activity	0.00244	null	null	1.544	92.8911	0.867	0.83	8081	1		GO:0033764	steroid dehydrogenase activity, acting on the CH-OH group of donors, NAD or NADP as acceptor	0.00098	null	null	1.146	50.7637	0.894	0.89	3854	1		GO:0016763	transferase activity, transferring pentosyl groups	0.00405	3.415	7.009	1.763	108.746	0.833	0.595	16763	0		GO:0003810	protein-glutamine gamma-glutamyltransferase activity	0.00063	2.568	-6.966	0.954	-117.875	0.836	0.567	3810	0
GO:0004725	protein tyrosine phosphatase activity	0.00573	null	null	1.914	106.531	0.858	0.726	8081	1		GO:0005272	sodium channel activity	0.00133	-1.878	7.075	1.279	106.373	0.84	0.588	5272	0		GO:0008238	exopeptidase activity	0.00545	3.837	-6.106	1.892	84.8434	0.836	0.595	8238	0		GO:0009008	DNA-methyltransferase activity	0.00042	2.775	-6.965	0.778	-111.055	0.844	0.568	9008	0
GO:0004857	enzyme inhibitor activity	0.01865	-0.436	-0.204	2.427	128.735	0.927	0.612	4857	0		GO:0019840	isoprenoid binding	0.00133	0.687	-0.446	1.279	106.257	0.957	0.588	19840	0		GO:0043120	tumor necrosis factor binding	0.00035	-6.611	-0.67	0.699	314.967	0.905	0.596	43120	0		GO:0004383	guanylate cyclase activity	0.00105	-1.017	0.229	1.176	-88.8458	0.904	0.568	4383	0
GO:0005125	cytokine activity	0.0132	8.598	0.824	2.276	107.45	0.892	0.613	5125	0		GO:0004962	endothelin receptor activity	0.00035	-2.094	-2.991	0.699	142.386	0.93	0.589	4962	0		GO:0019956	chemokine binding	0.00314	null	null	1.653	55.1942	0.89	0.85	43120	1		GO:0016763	transferase activity, transferring pentosyl groups	0.00405	3.273	-7.377	1.763	-36.6509	0.826	0.569	16763	0
GO:0009982	pseudouridine synthase activity	0.00105	0.552	1.399	1.176	126.083	0.936	0.614	9982	0		GO:0015057	thrombin receptor activity	0.00035	-2.785	-3.788	0.699	125.386	0.93	0.589	15057	0		GO:0004950	chemokine receptor activity	0.00307	null	null	1.643	64.3932	0.877	0.913	43120	1		GO:0019107	myristoyltransferase activity	0.00042	2.49	-6.703	0.778	-126.02	0.839	0.573	19107	0
GO:0016866	intramolecular transferase activity	0.00237	null	null	1.531	96.3992	0.932	0.716	9982	1		GO:0004768	stearoyl-CoA 9-desaturase activity	0.00028	-2.367	1.743	0.602	1639.79	0.897	0.59	4768	0		GO:0004896	cytokine receptor activity	0.00384	null	null	1.74	117.084	0.879	0.712	43120	1		GO:0032404	mismatch repair complex binding	0.00035	-6.898	0.733	0.699	-63.4228	0.923	0.574	32404	0
GO:0004767	sphingomyelin phosphodiesterase activity	0.00021	-3.622	3.897	0.477	223.929	0.883	0.616	4767	0		GO:0016934	extracellular-glycine-gated chloride channel activity	0.00014	-1.64	6.807	0.301	150.379	0.854	0.595	16934	0		GO:0019959	interleukin-8 binding	0.00049	null	null	0.845	116.975	0.9	0.73	43120	1		GO:0004386	helicase activity	0.00887	4.128	5.995	2.104	-50.5776	0.837	0.575	4386	0
GO:0008374	O-acyltransferase activity	0.00189	-1.903	-6.825	1.431	129.941	0.89	0.617	8374	0		GO:0015631	tubulin binding	0.00719	7.145	-1.063	2.013	56.5677	0.904	0.597	15631	0		GO:0019958	C-X-C chemokine binding	0.00112	null	null	1.204	64.6649	0.895	0.797	43120	1		GO:0019209	kinase activator activity	0.00126	1.698	0.087	1.255	-86.3453	0.939	0.577	19209	0
GO:0070513	death domain binding	0.00049	7.31	0.599	0.845	89.3098	0.923	0.618	70513	0		GO:0005275	amine transmembrane transporter activity	0.00426	-1.887	7.115	1.785	56.1442	0.825	0.606	5275	0		GO:0016494	C-X-C chemokine receptor activity	0.00105	null	null	1.176	80.8312	0.884	0.937	43120	1		GO:0035014	phosphatidylinositol 3-kinase regulator activity	0.00028	null	null	0.602	-54.1453	0.948	0.703	19209	1
GO:0005230	extracellular ligand-gated ion channel activity	0.00405	-3.023	7.897	1.763	201.399	0.815	0.621	5230	0		GO:0010181	FMN binding	0.00133	-1.032	0.509	1.279	75.1017	0.963	0.611	10181	0		GO:0003735	structural constituent of ribosome	0.02095	-1.013	-0.273	2.477	77.5383	0.991	0.603	3735	0		GO:0051020	GTPase binding	0.00307	-7.279	0.849	1.643	-25.8187	0.909	0.587	51020	0
GO:0005217	intracellular ligand-gated ion channel activity	0.0007	null	null	1	160.529	0.837	0.775	5230	1		GO:0005179	hormone activity	0.01229	8.419	-1.331	2.246	87.462	0.894	0.613	5179	0		GO:0019992	diacylglycerol binding	0.0022	-0.328	0.085	1.491	149.266	0.957	0.603	19992	0		GO:0004722	protein serine/threonine phosphatase activity	0.00168	4.454	6.631	1.38	-52.3814	0.835	0.592	4722	0
GO:0005216	ion channel activity	0.02388	null	null	2.534	124.189	0.789	0.923	5230	1		GO:0008083	growth factor activity	0.01236	7.941	-1.233	2.248	49.5176	0.894	0.613	8083	0		GO:0043140	ATP-dependent 3'-5' DNA helicase activity	0.00014	3.836	-5.955	0.301	150.747	0.86	0.608	43140	0		GO:0008395	steroid hydroxylase activity	0.00049	1.662	-0.682	0.845	-105.338	0.868	0.594	8395	0
GO:0005261	cation channel activity	0.01592	null	null	2.358	142.827	0.792	0.792	5230	1		GO:0004767	sphingomyelin phosphodiesterase activity	0.00021	-2.215	4.236	0.477	223.929	0.889	0.616	4767	0		GO:0043138	3'-5' DNA helicase activity	0.00021	null	null	0.477	100.498	0.859	0.769	43140	1		GO:0004563	beta-N-acetylhexosaminidase activity	0.00028	3.52	5.568	0.602	-214.983	0.861	0.596	4563	0
GO:0005267	potassium channel activity	0.00733	null	null	2.021	135.979	0.804	0.805	5230	1		GO:0008374	O-acyltransferase activity	0.00189	-3.505	-6.437	1.431	96.0126	0.871	0.617	8374	0		GO:0043139	5'-3' DNA helicase activity	0.00021	null	null	0.477	148.077	0.859	0.751	43140	1		GO:0004415	hyalurononglucosaminidase activity	0.00063	null	null	0.954	-83.2377	0.854	0.873	4563	1
GO:0005242	inward rectifier potassium channel activity	0.00098	null	null	1.146	164.512	0.828	0.796	5230	1		GO:0070513	death domain binding	0.00049	7.016	-1.039	0.845	119.08	0.922	0.618	70513	0		GO:0004003	ATP-dependent DNA helicase activity	0.00105	null	null	1.176	85.1097	0.842	0.85	43140	1		GO:0004649	poly(ADP-ribose) glycohydrolase activity	0.00014	4.009	6.025	0.301	-50.7148	0.868	0.596	4649	0
GO:0015276	ligand-gated ion channel activity	0.00684	null	null	1.991	170.432	0.807	0.944	5230	1		GO:0004499	flavin-containing monooxygenase activity	0.00063	-1.372	1.109	0.954	121.178	0.892	0.622	4499	0		GO:0003810	protein-glutamine gamma-glutamyltransferase activity	0.00063	2.411	6.883	0.954	117.875	0.847	0.609	3810	0		GO:0043120	tumor necrosis factor binding	0.00035	-7.032	0.671	0.699	-314.967	0.901	0.596	43120	0
GO:0015267	channel activity	0.02458	null	null	2.547	119.794	0.795	0.973	5230	1		GO:0001786	phosphatidylserine binding	0.0007	0.696	-0.495	1	1095.77	0.958	0.625	1786	0		GO:0016715	oxidoreductase activity, acting on paired donors, with incorporation or reduction of molecular oxygen, reduced ascorbate as one donor, and incorporation of one atom of oxygen	0.00035	2.424	1.303	0.699	60.8855	0.879	0.613	16715	0		GO:0016408	C-acyltransferase activity	0.00091	2.513	-6.72	1.114	-81.4328	0.831	0.603	16408	0
GO:0022836	gated channel activity	0.01865	null	null	2.427	124.073	0.8	0.937	5230	1		GO:0046912	transferase activity, transferring acyl groups, acyl groups converted into alkyl on transfer	0.0007	-3.737	-6.875	1	51.1086	0.88	0.634	46912	0		GO:0070001	aspartic-type peptidase activity	0.0081	3.902	-6.091	2.064	131.301	0.831	0.62	70001	0		GO:0016410	N-acyltransferase activity	0.00419	null	null	1.778	-28.3394	0.813	0.802	16408	1
GO:0022834	ligand-gated channel activity	0.00684	null	null	1.991	170.432	0.815	0.745	5230	1		GO:0004064	arylesterase activity	0.00035	-1.193	3.568	0.699	108.923	0.894	0.637	4064	0		GO:0004568	chitinase activity	0.00056	3.482	-5.806	0.903	450.961	0.859	0.621	4568	0		GO:0016407	acetyltransferase activity	0.00356	null	null	1.708	-42.3991	0.815	0.705	16408	1
GO:0022838	substrate-specific channel activity	0.02409	null	null	2.538	121.915	0.792	0.969	5230	1		GO:0004448	isocitrate dehydrogenase activity	0.00084	-1.575	1.261	1.079	275.284	0.896	0.639	4448	0		GO:0004022	alcohol dehydrogenase (NAD) activity	0.00028	1.248	0.531	0.602	98.8352	0.879	0.623	4022	0		GO:0019992	diacylglycerol binding	0.0022	-0.616	0.136	1.491	-78.5752	0.956	0.603	19992	0
GO:0008429	phosphatidylethanolamine binding	0.00042	0.227	0.148	0.778	1370.91	0.962	0.625	8429	0		GO:0008509	anion transmembrane transporter activity	0.00712	-2.49	7.525	2.009	66.1219	0.837	0.64	8509	0		GO:0003700	sequence-specific DNA binding transcription factor activity	0.04931	-0.422	-0.224	2.849	113.047	0.991	0.624	3700	0		GO:0016847	1-aminocyclopropane-1-carboxylate synthase activity	0.00056	-1.861	0.937	0.903	-34.3899	0.908	0.607	16847	0
GO:0008201	heparin binding	0.00552	0.757	0.362	1.898	151.474	0.952	0.627	8201	0		GO:0017134	fibroblast growth factor binding	0.00091	6.925	-1.025	1.114	124.54	0.919	0.643	17134	0		GO:0016408	C-acyltransferase activity	0.00091	2.355	6.574	1.114	81.4328	0.843	0.625	16408	0		GO:0003678	DNA helicase activity	0.00147	3.706	5.827	1.322	-81.1074	0.848	0.608	3678	0
GO:0030247	polysaccharide binding	0.0088	null	null	2.1	107.837	0.95	0.976	8201	1		GO:0005520	insulin-like growth factor binding	0.00189	null	null	1.431	60.5143	0.915	0.749	17134	1		GO:0016410	N-acyltransferase activity	0.00419	null	null	1.778	56.4694	0.826	0.714	16408	1		GO:0008026	ATP-dependent helicase activity	0.00643	null	null	1.964	-67.8382	0.829	0.809	3678	1
GO:0005529	sugar binding	0.0095	null	null	2.134	142.159	0.952	0.787	8201	1		GO:0016813	hydrolase activity, acting on carbon-nitrogen (but not peptide) bonds, in linear amidines	0.00098	-2.418	4.379	1.146	80.0178	0.908	0.643	16813	0		GO:0003777	microtubule motor activity	0.00391	3.791	-6.135	1.748	61.4293	0.842	0.626	3777	0		GO:0070035	purine NTP-dependent helicase activity	0.00643	null	null	1.964	-67.8382	0.832	0.928	3678	1
GO:0005539	glycosaminoglycan binding	0.00761	null	null	2.037	116.859	0.951	0.931	8201	1		GO:0004817	cysteine-tRNA ligase activity	0.00014	-0.838	0.57	0.301	227.422	0.926	0.645	4817	0		GO:0004722	protein serine/threonine phosphatase activity	0.00168	4.263	-6.771	1.38	85.4424	0.834	0.631	4722	0		GO:0008079	translation termination factor activity	0.00049	-0.002	0.199	0.845	-49.3156	0.959	0.613	8079	0
GO:0003779	actin binding	0.01299	7.769	0.708	2.27	134.864	0.9	0.627	3779	0		GO:0005137	interleukin-5 receptor binding	0.00014	7.288	-1.168	0.301	151.345	0.916	0.645	5137	0		GO:0004630	phospholipase D activity	0.00021	4.18	-6.639	0.477	173.686	0.855	0.633	4630	0		GO:0016715	oxidoreductase activity, acting on paired donors, with incorporation or reduction of molecular oxygen, reduced ascorbate as one donor, and incorporation of one atom of oxygen	0.00035	2.56	-0.893	0.699	-81.1807	0.87	0.613	16715	0
GO:0015631	tubulin binding	0.00719	null	null	2.013	131.481	0.905	0.773	3779	1		GO:0022834	ligand-gated channel activity	0.00684	-1.794	7.019	1.991	128.38	0.827	0.648	22834	0		GO:0019901	protein kinase binding	0.00761	-7.75	-0.88	2.037	147.519	0.883	0.636	19901	0		GO:0070330	aromatase activity	0.00035	2.709	-0.881	0.699	-49.6869	0.87	0.613	70330	0
GO:0015399	primary active transmembrane transporter activity	0.00684	-2.67	7.529	1.991	173.456	0.806	0.629	15399	0		GO:0005216	ion channel activity	0.02388	null	null	2.534	44.895	0.804	0.937	22834	1		GO:0019900	kinase binding	0.00908	null	null	2.114	129.584	0.882	0.725	19901	1		GO:0019959	interleukin-8 binding	0.00049	-6.831	0.747	0.845	-116.975	0.895	0.618	19959	0
GO:0005275	amine transmembrane transporter activity	0.00426	null	null	1.785	106.587	0.811	0.732	15399	1		GO:0005261	cation channel activity	0.01592	null	null	2.358	72.4899	0.807	0.792	22834	1		GO:0005080	protein kinase C binding	0.00084	null	null	1.079	107.494	0.9	0.779	19901	1		GO:0019956	chemokine binding	0.00314	null	null	1.653	-37.7385	0.886	0.719	19959	1
GO:0046912	transferase activity, transferring acyl groups, acyl groups converted into alkyl on transfer	0.0007	-2.146	-7.142	1	121.368	0.897	0.634	46912	0		GO:0015267	channel activity	0.02458	null	null	2.547	43.2586	0.809	0.973	22834	1		GO:0019902	phosphatase binding	0.00244	-7.629	-0.861	1.544	63.7432	0.893	0.638	19902	0		GO:0004950	chemokine receptor activity	0.00307	null	null	1.643	-44.0283	0.853	0.913	19959	1
GO:0004064	arylesterase activity	0.00035	-3.141	3.385	0.699	108.923	0.888	0.637	4064	0		GO:0022836	gated channel activity	0.01865	null	null	2.427	60.0703	0.814	0.89	22834	1		GO:0004457	lactate dehydrogenase activity	0.00056	1.802	0.815	0.903	76.0489	0.874	0.638	4457	0		GO:0004896	cytokine receptor activity	0.00384	null	null	1.74	-36.2706	0.858	0.85	19959	1
GO:0004091	carboxylesterase activity	0.00154	null	null	1.342	92.6022	0.877	0.703	4064	1		GO:0022838	substrate-specific channel activity	0.02409	null	null	2.538	44.0242	0.806	0.969	22834	1		GO:0031267	small GTPase binding	0.00265	-8.014	-0.911	1.58	61.4377	0.893	0.642	31267	0		GO:0019957	C-C chemokine binding	0.00161	null	null	1.362	-26.8707	0.887	0.94	19959	1
GO:0004448	isocitrate dehydrogenase activity	0.00084	-1.713	-0.734	1.079	275.284	0.91	0.639	4448	0		GO:0042169	SH2 domain binding	0.00091	7.394	-1.132	1.114	98.6493	0.919	0.648	42169	0		GO:0016881	acid-amino acid ligase activity	0.01481	3.392	-2.86	2.326	77.5199	0.858	0.644	16881	0		GO:0019958	C-X-C chemokine binding	0.00112	null	null	1.204	-64.6649	0.89	0.797	19959	1
GO:0008509	anion transmembrane transporter activity	0.00712	-2.865	7.773	2.009	191.457	0.825	0.64	8509	0		GO:0000030	mannosyltransferase activity	0.00056	-3.497	-6.468	0.903	70.8736	0.881	0.648	30	0		GO:0016879	ligase activity, forming carbon-nitrogen bonds	0.01767	null	null	2.403	74.4881	0.857	0.865	16881	1		GO:0016494	C-X-C chemokine receptor activity	0.00105	null	null	1.176	-80.8312	0.863	0.937	19959	1
GO:0019207	kinase regulator activity	0.00524	-0.704	-0.404	1.875	94.9706	0.934	0.641	19207	0		GO:0008378	galactosyltransferase activity	0.00196	-3.48	-6.387	1.447	697.274	0.866	0.648	8378	0		GO:0008237	metallopeptidase activity	0.01208	3.988	-6.045	2.238	105.713	0.826	0.647	8237	0		GO:0016493	C-C chemokine receptor activity	0.00161	null	null	1.362	-26.8707	0.86	0.944	19959	1
GO:0032813	tumor necrosis factor receptor superfamily binding	0.00175	8.403	0.844	1.398	271.962	0.903	0.642	32813	0		GO:0016866	intramolecular transferase activity	0.00237	1.247	-0.196	1.531	50.0239	0.919	0.65	16866	0		GO:0016877	ligase activity, forming carbon-sulfur bonds	0.00112	1.09	-1.018	1.204	76.2924	0.882	0.648	16877	0		GO:0070001	aspartic-type peptidase activity	0.0081	4.025	5.964	2.064	-29.4856	0.843	0.62	70001	0
GO:0004817	cysteine-tRNA ligase activity	0.00014	-0.172	-0.083	0.301	227.422	0.935	0.645	4817	0		GO:0004792	thiosulfate sulfurtransferase activity	0.00028	-3.435	-6.343	0.602	90.4631	0.896	0.65	4792	0		GO:0008276	protein methyltransferase activity	0.00286	2.732	6.731	1.613	102.668	0.836	0.648	8276	0		GO:0070566	adenylyltransferase activity	0.00077	2.517	-6.756	1.041	-74.1295	0.841	0.621	70566	0
GO:0042169	SH2 domain binding	0.00091	7.669	0.677	1.114	98.6493	0.92	0.648	42169	0		GO:0016783	sulfurtransferase activity	0.00049	null	null	0.845	60.3088	0.892	0.701	4792	1		GO:0008170	N-methyltransferase activity	0.00265	null	null	1.58	69.44	0.836	0.75	8276	1		GO:0004022	alcohol dehydrogenase (NAD) activity	0.00028	1.225	-0.424	0.602	-131.78	0.871	0.623	4022	0
GO:0008378	galactosyltransferase activity	0.00196	-1.912	-6.827	1.447	761.555	0.887	0.648	8378	0		GO:0017150	tRNA dihydrouridine synthase activity	0.00035	-2.221	1.641	0.699	79.6706	0.906	0.652	17150	0		GO:0051020	GTPase binding	0.00307	-7.25	-0.817	1.643	64.597	0.891	0.651	51020	0		GO:0051059	NF-kappaB binding	0.00105	-6.947	0.797	1.176	-72.2681	0.915	0.628	51059	0
GO:0016849	phosphorus-oxygen lyase activity	0.0021	-0.136	2.26	1.477	125.892	0.936	0.649	16849	0		GO:0050508	glucuronosyl-N-acetylglucosaminyl-proteoglycan 4-alpha-N-acetylglucosaminyltransferase activity	0.00014	-3.358	-6.2	0.301	178.193	0.882	0.658	50508	0		GO:0004459	L-lactate dehydrogenase activity	0.00056	1.814	0.814	0.903	76.0489	0.873	0.651	4459	0		GO:0004931	extracellular ATP-gated cation channel activity	0.00035	1.261	-1.126	0.699	-58.7564	0.946	0.629	4931	0
GO:0004062	aryl sulfotransferase activity	0.00014	-1.6	-6.399	0.301	158.343	0.911	0.65	4062	0		GO:0017176	phosphatidylinositol N-acetylglucosaminyltransferase activity	0.00021	null	null	0.477	69.789	0.879	0.726	50508	1		GO:0005496	steroid binding	0.003	-0.136	0.033	1.633	91.3399	0.957	0.653	5496	0		GO:0016504	peptidase activator activity	0.0014	1.28	-0.225	1.301	-48.4093	0.941	0.629	16504	0
GO:0032555	purine ribonucleotide binding	0.11872	-1.004	-0.612	3.23	113.173	0.931	0.653	32555	0		GO:0050509	N-acetylglucosaminyl-proteoglycan 4-beta-glucuronosyltransferase activity	0.00014	-3.361	-6.205	0.301	178.193	0.882	0.658	50509	0		GO:0035091	phosphatidylinositol binding	0.00503	null	null	1.857	86.4502	0.954	0.702	5496	1		GO:0004437	inositol or phosphatidylinositol phosphatase activity	0.00133	3.972	6.175	1.279	-42.4579	0.838	0.631	4437	0
GO:0017076	purine nucleotide binding	0.11921	null	null	3.232	114.237	0.933	0.767	32555	1		GO:0004821	histidine-tRNA ligase activity	0.00021	-0.799	0.568	0.477	127.124	0.924	0.661	4821	0		GO:0003887	DNA-directed DNA polymerase activity	0.00182	2.592	6.975	1.415	76.085	0.842	0.659	3887	0		GO:0050431	transforming growth factor beta binding	0.00035	-6.571	0.759	0.699	-29.4955	0.896	0.632	50431	0
GO:0032553	ribonucleotide binding	0.11872	null	null	3.23	113.173	0.933	0.766	32555	1		GO:0005007	fibroblast growth factor receptor activity	0.00056	-3.475	-5.911	0.903	74.9404	0.855	0.663	5007	0		GO:0034061	DNA polymerase activity	0.00307	null	null	1.643	66.8061	0.836	0.777	3887	1		GO:0004630	phospholipase D activity	0.00021	4.411	6.608	0.477	-80.9716	0.856	0.633	4630	0
GO:0003899	DNA-directed RNA polymerase activity	0.00286	-2.027	-6.93	1.613	101.123	0.881	0.656	3899	0		GO:0046915	transition metal ion transmembrane transporter activity	0.00105	-2.092	7.094	1.176	144.514	0.846	0.667	46915	0		GO:0016289	CoA hydrolase activity	0.0007	4.25	-6.814	1	105.957	0.847	0.659	16289	0		GO:0004478	methionine adenosyltransferase activity	0.00014	2.405	-6.557	0.301	-88.5872	0.851	0.637	4478	0
GO:0034062	RNA polymerase activity	0.00286	null	null	1.613	101.123	0.881	0.803	3899	1		GO:0004622	lysophospholipase activity	0.00035	-2.727	4.784	0.699	105.856	0.893	0.668	4622	0		GO:0004221	ubiquitin thiolesterase activity	0.00419	null	null	1.778	70.4806	0.827	0.814	16289	1		GO:0004457	lactate dehydrogenase activity	0.00056	1.851	-0.69	0.903	-152.098	0.866	0.638	4457	0
GO:0050509	N-acetylglucosaminyl-proteoglycan 4-beta-glucuronosyltransferase activity	0.00014	-1.621	-6.573	0.301	89.0965	0.901	0.658	50509	0		GO:0004829	threonine-tRNA ligase activity	0.00028	-0.802	0.563	0.602	210.991	0.923	0.673	4829	0		GO:0004745	retinol dehydrogenase activity	0.0007	3.304	1.844	1	57.637	0.872	0.661	4745	0		GO:0004303	estradiol 17-beta-dehydrogenase activity	0.00049	2.587	-0.923	0.845	-47.8842	0.866	0.646	4303	0
GO:0004821	histidine-tRNA ligase activity	0.00021	-0.098	-0.062	0.477	127.124	0.934	0.661	4821	0		GO:0004000	adenosine deaminase activity	0.00042	-1.174	3.435	0.778	65.1976	0.913	0.673	4000	0		GO:0031625	ubiquitin protein ligase binding	0.0037	-6.953	-0.809	1.724	85.4636	0.89	0.663	31625	0		GO:0004568	chitinase activity	0.00056	3.553	5.616	0.903	-160.766	0.857	0.649	4568	0
GO:0043492	ATPase activity, coupled to movement of substances	0.00608	-3.665	3.717	1.94	174.73	0.873	0.661	43492	0		GO:0015355	secondary active monocarboxylate transmembrane transporter activity	0.00028	-2.03	6.892	0.602	205.347	0.835	0.677	15355	0		GO:0003945	N-acetyllactosamine synthase activity	0.00014	2.316	6.529	0.301	160.065	0.859	0.663	3945	0		GO:0015923	mannosidase activity	0.00105	null	null	1.176	-31.8499	0.851	0.745	4568	1
GO:0046915	transition metal ion transmembrane transporter activity	0.00105	-2.637	7.442	1.176	215.271	0.835	0.667	46915	0		GO:0008508	bile acid:sodium symporter activity	0.00091	null	null	1.114	49.6521	0.813	0.878	15355	1		GO:0048531	beta-1,3-galactosyltransferase activity	0.00028	null	null	0.602	89.055	0.855	0.73	3945	1		GO:0015929	hexosaminidase activity	0.00112	null	null	1.204	-60.4975	0.85	0.712	4568	1
GO:0070569	uridylyltransferase activity	0.00028	-1.718	-6.748	0.602	88.0292	0.898	0.67	70569	0		GO:0015125	bile acid transmembrane transporter activity	0.00091	null	null	1.114	49.6521	0.836	0.952	15355	1		GO:0003831	beta-N-acetylglucosaminylglycopeptide beta-1,4-galactosyltransferase activity	0.00014	null	null	0.301	160.065	0.859	0.758	3945	1		GO:0004459	L-lactate dehydrogenase activity	0.00056	1.863	-0.688	0.903	-152.098	0.865	0.651	4459	0
GO:0004829	threonine-tRNA ligase activity	0.00028	-0.127	-0.075	0.602	210.991	0.933	0.673	4829	0		GO:0048487	beta-tubulin binding	0.00084	7.376	-1.117	1.079	45.8753	0.916	0.678	48487	0		GO:0016860	intramolecular oxidoreductase activity	0.00216	0.53	-2.399	1.491	71.5302	0.879	0.664	16860	0		GO:0005496	steroid binding	0.003	-0.363	-0.02	1.633	-65.6211	0.956	0.653	5496	0
GO:0005520	insulin-like growth factor binding	0.00189	6.963	0.592	1.431	98.1995	0.92	0.674	5520	0		GO:0008009	chemokine activity	0.00356	8.421	-1.346	1.708	122.552	0.897	0.68	8009	0		GO:0016859	cis-trans isomerase activity	0.00293	null	null	1.623	68.469	0.877	0.772	16860	1		GO:0035091	phosphatidylinositol binding	0.00503	null	null	1.857	-33.2692	0.953	0.702	5496	1
GO:0017176	phosphatidylinositol N-acetylglucosaminyltransferase activity	0.00021	-1.782	-6.834	0.477	320.221	0.898	0.675	17176	0		GO:0042379	chemokine receptor binding	0.0037	null	null	1.724	122.552	0.897	0.841	8009	1		GO:0003755	peptidyl-prolyl cis-trans isomerase activity	0.00286	null	null	1.613	60.8606	0.877	0.791	16860	1		GO:0015297	antiporter activity	0.00356	1.102	-0.942	1.708	-39.6739	0.934	0.656	15297	0
GO:0050508	glucuronosyl-N-acetylglucosaminyl-proteoglycan 4-alpha-N-acetylglucosaminyltransferase activity	0.00014	null	null	0.301	89.0965	0.9	0.726	17176	1		GO:0016706	oxidoreductase activity, acting on paired donors, with incorporation or reduction of molecular oxygen, 2-oxoglutarate as one donor, and incorporation of one atom each of oxygen into both donors	0.00216	-2.002	1.574	1.491	93.4917	0.884	0.684	16706	0		GO:0016563	transcription activator activity	0.01341	-0.774	-0.04	2.283	86.5641	0.987	0.671	16563	0		GO:0005328	neurotransmitter:sodium symporter activity	0.00182	null	null	1.415	-33.9453	0.932	0.746	15297	1
GO:0046914	transition metal ion binding	0.1306	-2.146	-1.517	3.272	93.7604	0.938	0.676	46914	0		GO:0015450	P-P-bond-hydrolysis-driven protein transmembrane transporter activity	0.00084	-1.926	7.019	1.079	80.464	0.838	0.685	15450	0		GO:0019209	kinase activator activity	0.00126	1.593	1.429	1.255	64.759	0.937	0.672	19209	0		GO:0005391	sodium:potassium-exchanging ATPase activity	0.0007	null	null	1	-26.068	0.807	0.747	15297	1
GO:0015355	secondary active monocarboxylate transmembrane transporter activity	0.00028	-2.588	7.302	0.602	154.011	0.832	0.677	15355	0		GO:0008320	protein transmembrane transporter activity	0.00084	null	null	1.079	80.464	0.86	0.999	15450	1		GO:0017017	MAP kinase tyrosine/serine/threonine phosphatase activity	0.00063	3.764	-6.31	0.954	58.7125	0.844	0.674	17017	0		GO:0003827	alpha-1,3-mannosylglycoprotein 2-beta-N-acetylglucosaminyltransferase activity	0.00028	2.537	-6.844	0.602	-118.467	0.851	0.658	3827	0
GO:0016706	oxidoreductase activity, acting on paired donors, with incorporation or reduction of molecular oxygen, 2-oxoglutarate as one donor, and incorporation of one atom each of oxygen into both donors	0.00216	-2.977	-0.951	1.491	152.131	0.898	0.678	16706	0		GO:0016933	extracellular-glycine-gated ion channel activity	0.00014	-1.625	6.8	0.301	150.379	0.86	0.686	16933	0		GO:0000217	DNA secondary structure binding	0.00063	0.336	0.305	0.954	246.545	0.956	0.676	217	0		GO:0016289	CoA hydrolase activity	0.0007	4.49	6.809	1	-105.957	0.85	0.659	16289	0
GO:0015085	calcium ion transmembrane transporter activity	0.00105	-2.844	7.708	1.176	179.247	0.832	0.683	15085	0		GO:0048029	monosaccharide binding	0.00189	1.565	-1.107	1.431	170.448	0.967	0.686	48029	0		GO:0003697	single-stranded DNA binding	0.00244	null	null	1.544	92.8729	0.953	0.765	217	1		GO:0016860	intramolecular oxidoreductase activity	0.00216	-0.723	2.247	1.491	-50.5565	0.878	0.664	16860	0
GO:0005388	calcium-transporting ATPase activity	0.00063	null	null	0.954	179.247	0.741	0.909	15085	1		GO:0005529	sugar binding	0.0095	null	null	2.134	70.5668	0.965	0.709	48029	1		GO:0003690	double-stranded DNA binding	0.00335	null	null	1.681	57.4905	0.952	0.874	217	1		GO:0004185	serine-type carboxypeptidase activity	0.00042	4.093	6.013	0.778	-73.0141	0.868	0.667	4185	0
GO:0015450	P-P-bond-hydrolysis-driven protein transmembrane transporter activity	0.00084	-2.554	7.341	1.079	148.067	0.824	0.685	15450	0		GO:0005242	inward rectifier potassium channel activity	0.00098	-1.816	7.018	1.146	219.35	0.837	0.687	5242	0		GO:0004222	metalloendopeptidase activity	0.0074	4.217	-6.446	2.025	114.056	0.831	0.676	4222	0		GO:0070008	serine-type exopeptidase activity	0.00042	3.556	5.649	0.778	-73.0141	0.868	0.667	70008	0
GO:0008320	protein transmembrane transporter activity	0.00084	null	null	1.079	148.067	0.851	0.999	15450	1		GO:0005230	extracellular ligand-gated ion channel activity	0.00405	null	null	1.763	143.329	0.824	0.796	5242	1		GO:0033549	MAP kinase phosphatase activity	0.0007	3.739	-6.231	1	58.7125	0.843	0.679	33549	0		GO:0008607	phosphorylase kinase regulator activity	0.00014	1.223	-0.056	0.301	-59.7063	0.95	0.672	8607	0
GO:0005525	GTP binding	0.0264	-0.656	-0.43	2.577	151.357	0.933	0.685	5525	0		GO:0015276	ligand-gated ion channel activity	0.00684	null	null	1.991	128.38	0.817	0.944	5242	1		GO:0048407	platelet-derived growth factor binding	0.00105	-7.217	-0.799	1.176	69.0324	0.915	0.679	48407	0		GO:0017017	MAP kinase tyrosine/serine/threonine phosphatase activity	0.00063	3.972	6.188	0.954	-44.915	0.845	0.674	17017	0
GO:0032561	guanyl ribonucleotide binding	0.02696	null	null	2.587	150.042	0.933	0.969	5525	1		GO:0004012	phospholipid-translocating ATPase activity	0.00063	-2.509	6.801	0.954	45.8494	0.788	0.688	4012	0		GO:0004527	exonuclease activity	0.00328	3.709	-6.093	1.672	179.587	0.825	0.681	4527	0		GO:0000217	DNA secondary structure binding	0.00063	0.176	0.075	0.954	-246.545	0.956	0.676	217	0
GO:0005543	phospholipid binding	0.00873	0.133	0.124	2.097	109.999	0.955	0.686	5543	0		GO:0015247	aminophospholipid transporter activity	0.00035	null	null	0.699	45.8494	0.875	0.935	4012	1		GO:0031418	L-ascorbic acid binding	0.00161	-1.134	-0.083	1.362	107.926	0.964	0.681	31418	0		GO:0030983	mismatched DNA binding	0.00112	null	null	1.204	-27.1812	0.955	0.82	217	1
GO:0048029	monosaccharide binding	0.00189	1.125	0.409	1.431	263.006	0.956	0.686	48029	0		GO:0005178	integrin binding	0.00293	8.349	-1.32	1.623	190.432	0.9	0.689	5178	0		GO:0070279	vitamin B6 binding	0.00461	null	null	1.82	75.7137	0.962	0.868	31418	1		GO:0003690	double-stranded DNA binding	0.00335	null	null	1.681	-57.4905	0.952	0.784	217	1
GO:0004012	phospholipid-translocating ATPase activity	0.00063	-3.287	6.649	0.954	148.465	0.775	0.688	4012	0		GO:0032813	tumor necrosis factor receptor superfamily binding	0.00175	8.396	-1.326	1.398	63.5567	0.903	0.69	32813	0		GO:0030170	pyridoxal phosphate binding	0.00461	null	null	1.82	75.7137	0.962	0.79	31418	1		GO:0016857	racemase and epimerase activity, acting on carbohydrates and derivatives	0.00056	-1.652	1.14	0.903	-26.3552	0.888	0.678	16857	0
GO:0015247	aminophospholipid transporter activity	0.00035	null	null	0.699	148.465	0.867	0.935	4012	1		GO:0015385	sodium:hydrogen antiporter activity	0.00056	-2.149	7.121	0.903	66.6136	0.833	0.692	15385	0		GO:0004826	phenylalanine-tRNA ligase activity	0.00028	0.677	-0.518	0.602	79.8847	0.891	0.682	4826	0		GO:0033549	MAP kinase phosphatase activity	0.0007	3.951	6.156	1	-44.915	0.844	0.679	33549	0
GO:0005178	integrin binding	0.00293	8.471	0.85	1.623	239.503	0.897	0.689	5178	0		GO:0005451	monovalent cation:hydrogen antiporter activity	0.00056	null	null	0.903	66.6136	0.837	0.891	15385	1		GO:0016836	hydro-lyase activity	0.00272	0.274	-2.906	1.591	72.3248	0.9	0.682	16836	0		GO:0048407	platelet-derived growth factor binding	0.00105	-7.458	0.811	1.176	-92.0433	0.917	0.679	48407	0
GO:0005158	insulin receptor binding	0.00251	null	null	1.556	110.729	0.898	0.785	5178	1		GO:0022803	passive transmembrane transporter activity	0.02458	-1.808	7.054	2.547	43.2586	0.827	0.693	22803	0		GO:0004415	hyalurononglucosaminidase activity	0.00063	3.549	-5.91	0.954	325.976	0.857	0.684	4415	0		GO:0004527	exonuclease activity	0.00328	3.789	5.963	1.672	-50.18	0.825	0.681	4527	0
GO:0008009	chemokine activity	0.00356	8.572	0.851	1.708	136.228	0.897	0.69	8009	0		GO:0004806	triglyceride lipase activity	0.00084	-2.022	4.174	1.079	71.9871	0.887	0.695	4806	0		GO:0015929	hexosaminidase activity	0.00112	null	null	1.204	141.41	0.853	0.718	4415	1		GO:0031418	L-ascorbic acid binding	0.00161	-1.842	0.896	1.362	-30.9363	0.978	0.681	31418	0
GO:0042379	chemokine receptor binding	0.0037	null	null	1.724	136.228	0.897	0.841	8009	1		GO:0008417	fucosyltransferase activity	0.0014	-3.455	-6.365	1.301	75.5767	0.869	0.695	8417	0		GO:0004563	beta-N-acetylhexosaminidase activity	0.00028	null	null	0.602	107.492	0.864	0.873	4415	1		GO:0004826	phenylalanine-tRNA ligase activity	0.00028	-0.547	0.252	0.602	-79.8847	0.896	0.682	4826	0
GO:0022803	passive transmembrane transporter activity	0.02458	-2.482	7.256	2.547	119.794	0.813	0.693	22803	0		GO:0019865	immunoglobulin binding	0.00056	6.944	-1.055	0.903	70.9122	0.924	0.696	19865	0		GO:0004386	helicase activity	0.00887	4.028	-6.17	2.104	97.6926	0.832	0.686	4386	0		GO:0005099	Ras GTPase activator activity	0.00356	0.943	-0.325	1.708	-30.5121	0.937	0.683	5099	0
GO:0019865	immunoglobulin binding	0.00056	7.281	0.636	0.903	101.609	0.921	0.696	19865	0		GO:0005217	intracellular ligand-gated ion channel activity	0.0007	-2.561	7.489	1	109.651	0.845	0.697	5217	0		GO:0003827	alpha-1,3-mannosylglycoprotein 2-beta-N-acetylglucosaminyltransferase activity	0.00028	2.352	6.713	0.602	118.467	0.855	0.693	3827	0		GO:0004525	ribonuclease III activity	0.00028	3.687	5.821	0.602	-96.6248	0.847	0.694	4525	0
																								GO:0004653	polypeptide N-acetylgalactosaminyltransferase activity	0.00028	2.779	6.997	0.602	148.94	0.855	0.693	4653	0		GO:0004526	ribonuclease P activity	0.00049	null	null	0.845	-29.4492	0.842	0.807	4525	1
																								GO:0070566	adenylyltransferase activity	0.00077	2.327	6.568	1.041	55.5971	0.85	0.697	70566	0
